# Supplementary material for: Interactive human–machine learning framework for modelling of ferroelectric–dielectric composites
Source: Royal Society of Chemistry journal article supplement (doi:10.1039/c9tc06073a), 2020-01-01
Supplement: c9tc06073a2.xlsx [file c9tc06073a2.xlsx]

## Sheet: simulated_data
frequency	1k	10k	100k	1M	10M	100M	1G	10G	electric field	defect	x	Mg	tunability	loss
1000	1	0	0	0	0	0	0	0	0	0.2	0.3	0	0	0.00117999
1000	1	0	0	0	0	0	0	0	1	0.2	0.3	0	6.8274e-05	0.00117991
1000	1	0	0	0	0	0	0	0	2	0.2	0.3	0	0.000274177	0.00117967
1000	1	0	0	0	0	0	0	0	3	0.2	0.3	0	0.000617163	0.00117927
1000	1	0	0	0	0	0	0	0	4	0.2	0.3	0	0.00109651	0.0011787
1000	1	0	0	0	0	0	0	0	5	0.2	0.3	0	0.00171132	0.00117798
1000	1	0	0	0	0	0	0	0	6	0.2	0.3	0	0.00246054	0.00117709
1000	1	0	0	0	0	0	0	0	7	0.2	0.3	0	0.00334293	0.00117605
1000	1	0	0	0	0	0	0	0	8	0.2	0.3	0	0.00435711	0.00117485
1000	1	0	0	0	0	0	0	0	9	0.2	0.3	0	0.00550151	0.0011735
1000	1	0	0	0	0	0	0	0	10	0.2	0.3	0	0.00677445	0.001172
1000	1	0	0	0	0	0	0	0	11	0.2	0.3	0	0.00817407	0.00117035
1000	1	0	0	0	0	0	0	0	12	0.2	0.3	0	0.00969839	0.00116855
1000	1	0	0	0	0	0	0	0	13	0.2	0.3	0	0.0113453	0.00116661
1000	1	0	0	0	0	0	0	0	14	0.2	0.3	0	0.0131125	0.00116452
1000	1	0	0	0	0	0	0	0	15	0.2	0.3	0	0.0149977	0.0011623
1000	1	0	0	0	0	0	0	0	16	0.2	0.3	0	0.0169983	0.00115994
1000	1	0	0	0	0	0	0	0	17	0.2	0.3	0	0.0191118	0.00115744
1000	1	0	0	0	0	0	0	0	18	0.2	0.3	0	0.0213356	0.00115482
1000	1	0	0	0	0	0	0	0	19	0.2	0.3	0	0.0236667	0.00115207
1000	1	0	0	0	0	0	0	0	20	0.2	0.3	0	0.0261025	0.00114919
1000	1	0	0	0	0	0	0	0	21	0.2	0.3	0	0.0286399	0.0011462
1000	1	0	0	0	0	0	0	0	22	0.2	0.3	0	0.031276	0.00114309
1000	1	0	0	0	0	0	0	0	23	0.2	0.3	0	0.0340077	0.00113987
1000	1	0	0	0	0	0	0	0	24	0.2	0.3	0	0.036832	0.00113653
1000	1	0	0	0	0	0	0	0	25	0.2	0.3	0	0.0397456	0.00113309
1000	1	0	0	0	0	0	0	0	26	0.2	0.3	0	0.0427455	0.00112955
1000	1	0	0	0	0	0	0	0	27	0.2	0.3	0	0.0458285	0.00112592
1000	1	0	0	0	0	0	0	0	28	0.2	0.3	0	0.0489914	0.00112218
1000	1	0	0	0	0	0	0	0	29	0.2	0.3	0	0.0522309	0.00111836
1000	1	0	0	0	0	0	0	0	30	0.2	0.3	0	0.0555438	0.00111445
1000	1	0	0	0	0	0	0	0	0	0.2	0.4	0	0	0.00197003
1000	1	0	0	0	0	0	0	0	1	0.2	0.4	0	0.000213658	0.0019696
1000	1	0	0	0	0	0	0	0	2	0.2	0.4	0	0.000856041	0.00196834
1000	1	0	0	0	0	0	0	0	3	0.2	0.4	0	0.00192386	0.00196624
1000	1	0	0	0	0	0	0	0	4	0.2	0.4	0	0.00341205	0.0019633
1000	1	0	0	0	0	0	0	0	5	0.2	0.4	0	0.00531381	0.00195956
1000	1	0	0	0	0	0	0	0	6	0.2	0.4	0	0.00762073	0.00195501
1000	1	0	0	0	0	0	0	0	7	0.2	0.4	0	0.0103228	0.00194969
1000	1	0	0	0	0	0	0	0	8	0.2	0.4	0	0.0134087	0.00194361
1000	1	0	0	0	0	0	0	0	9	0.2	0.4	0	0.0168656	0.0019368
1000	1	0	0	0	0	0	0	0	10	0.2	0.4	0	0.0206796	0.00192929
1000	1	0	0	0	0	0	0	0	11	0.2	0.4	0	0.0248359	0.0019211
1000	1	0	0	0	0	0	0	0	12	0.2	0.4	0	0.0293186	0.00191227
1000	1	0	0	0	0	0	0	0	13	0.2	0.4	0	0.0341112	0.00190283
1000	1	0	0	0	0	0	0	0	14	0.2	0.4	0	0.0391965	0.00189281
1000	1	0	0	0	0	0	0	0	15	0.2	0.4	0	0.044557	0.00188225
1000	1	0	0	0	0	0	0	0	16	0.2	0.4	0	0.0501749	0.00187118
1000	1	0	0	0	0	0	0	0	17	0.2	0.4	0	0.0560321	0.00185964
1000	1	0	0	0	0	0	0	0	18	0.2	0.4	0	0.0621106	0.00184767
1000	1	0	0	0	0	0	0	0	19	0.2	0.4	0	0.0683925	0.00183529
1000	1	0	0	0	0	0	0	0	20	0.2	0.4	0	0.0748599	0.00182255
1000	1	0	0	0	0	0	0	0	21	0.2	0.4	0	0.0814956	0.00180948
1000	1	0	0	0	0	0	0	0	22	0.2	0.4	0	0.0882824	0.00179611
1000	1	0	0	0	0	0	0	0	23	0.2	0.4	0	0.0952037	0.00178247
1000	1	0	0	0	0	0	0	0	24	0.2	0.4	0	0.102244	0.0017686
1000	1	0	0	0	0	0	0	0	25	0.2	0.4	0	0.109386	0.00175453
1000	1	0	0	0	0	0	0	0	26	0.2	0.4	0	0.116617	0.00174028
1000	1	0	0	0	0	0	0	0	27	0.2	0.4	0	0.123923	0.00172589
1000	1	0	0	0	0	0	0	0	28	0.2	0.4	0	0.131288	0.00171138
1000	1	0	0	0	0	0	0	0	29	0.2	0.4	0	0.138701	0.00169678
1000	1	0	0	0	0	0	0	0	30	0.2	0.4	0	0.14615	0.0016821
1000	1	0	0	0	0	0	0	0	0	0.2	0.5	0	0	0.00349183
1000	1	0	0	0	0	0	0	0	1	0.2	0.5	0	0.000951821	0.00348851
1000	1	0	0	0	0	0	0	0	2	0.2	0.5	0	0.00379597	0.00347857
1000	1	0	0	0	0	0	0	0	3	0.2	0.5	0	0.00847582	0.00346223
1000	1	0	0	0	0	0	0	0	4	0.2	0.5	0	0.0149015	0.0034398
1000	1	0	0	0	0	0	0	0	5	0.2	0.5	0	0.0229545	0.00341167
1000	1	0	0	0	0	0	0	0	6	0.2	0.5	0	0.0324936	0.00337837
1000	1	0	0	0	0	0	0	0	7	0.2	0.5	0	0.0433612	0.00334042
1000	1	0	0	0	0	0	0	0	8	0.2	0.5	0	0.0553897	0.00329841
1000	1	0	0	0	0	0	0	0	9	0.2	0.5	0	0.0684081	0.00325296
1000	1	0	0	0	0	0	0	0	10	0.2	0.5	0	0.0822469	0.00320463
1000	1	0	0	0	0	0	0	0	11	0.2	0.5	0	0.0967429	0.00315401
1000	1	0	0	0	0	0	0	0	12	0.2	0.5	0	0.111743	0.00310164
1000	1	0	0	0	0	0	0	0	13	0.2	0.5	0	0.127105	0.00304799
1000	1	0	0	0	0	0	0	0	14	0.2	0.5	0	0.142703	0.00299353
1000	1	0	0	0	0	0	0	0	15	0.2	0.5	0	0.158422	0.00293864
1000	1	0	0	0	0	0	0	0	16	0.2	0.5	0	0.174164	0.00288367
1000	1	0	0	0	0	0	0	0	17	0.2	0.5	0	0.189845	0.00282891
1000	1	0	0	0	0	0	0	0	18	0.2	0.5	0	0.205392	0.00277462
1000	1	0	0	0	0	0	0	0	19	0.2	0.5	0	0.220746	0.00272101
1000	1	0	0	0	0	0	0	0	20	0.2	0.5	0	0.23586	0.00266823
1000	1	0	0	0	0	0	0	0	21	0.2	0.5	0	0.250692	0.00261644
1000	1	0	0	0	0	0	0	0	22	0.2	0.5	0	0.265215	0.00256573
1000	1	0	0	0	0	0	0	0	23	0.2	0.5	0	0.279404	0.00251618
1000	1	0	0	0	0	0	0	0	24	0.2	0.5	0	0.293243	0.00246786
1000	1	0	0	0	0	0	0	0	25	0.2	0.5	0	0.306721	0.0024208
1000	1	0	0	0	0	0	0	0	26	0.2	0.5	0	0.319832	0.00237501
1000	1	0	0	0	0	0	0	0	27	0.2	0.5	0	0.332573	0.00233053
1000	1	0	0	0	0	0	0	0	28	0.2	0.5	0	0.344943	0.00228733
1000	1	0	0	0	0	0	0	0	29	0.2	0.5	0	0.356946	0.00224542
1000	1	0	0	0	0	0	0	0	30	0.2	0.5	0	0.368586	0.00220477
1000	1	0	0	0	0	0	0	0	0	0.2	0.6	0	0	0.00690769
1000	1	0	0	0	0	0	0	0	1	0.2	0.6	0	0.00827284	0.00685054
1000	1	0	0	0	0	0	0	0	2	0.2	0.6	0	0.0317	0.0066887
1000	1	0	0	0	0	0	0	0	3	0.2	0.6	0	0.066595	0.00644763
1000	1	0	0	0	0	0	0	0	4	0.2	0.6	0	0.108498	0.00615816
1000	1	0	0	0	0	0	0	0	5	0.2	0.6	0	0.153439	0.0058477
1000	1	0	0	0	0	0	0	0	6	0.2	0.6	0	0.198517	0.0055363
1000	1	0	0	0	0	0	0	0	7	0.2	0.6	0	0.241916	0.0052365
1000	1	0	0	0	0	0	0	0	8	0.2	0.6	0	0.282664	0.00495502
1000	1	0	0	0	0	0	0	0	9	0.2	0.6	0	0.320356	0.00469465
1000	1	0	0	0	0	0	0	0	10	0.2	0.6	0	0.354925	0.00445585
1000	1	0	0	0	0	0	0	0	11	0.2	0.6	0	0.386495	0.00423778
1000	1	0	0	0	0	0	0	0	12	0.2	0.6	0	0.415278	0.00403895
1000	1	0	0	0	0	0	0	0	13	0.2	0.6	0	0.441523	0.00385766
1000	1	0	0	0	0	0	0	0	14	0.2	0.6	0	0.465483	0.00369215
1000	1	0	0	0	0	0	0	0	15	0.2	0.6	0	0.487397	0.00354078
1000	1	0	0	0	0	0	0	0	16	0.2	0.6	0	0.507486	0.00340201
1000	1	0	0	0	0	0	0	0	17	0.2	0.6	0	0.525947	0.00327449
1000	1	0	0	0	0	0	0	0	18	0.2	0.6	0	0.542957	0.00315699
1000	1	0	0	0	0	0	0	0	19	0.2	0.6	0	0.55867	0.00304846
1000	1	0	0	0	0	0	0	0	20	0.2	0.6	0	0.573222	0.00294793
1000	1	0	0	0	0	0	0	0	21	0.2	0.6	0	0.586734	0.0028546
1000	1	0	0	0	0	0	0	0	22	0.2	0.6	0	0.59931	0.00276773
1000	1	0	0	0	0	0	0	0	23	0.2	0.6	0	0.611042	0.00268669
1000	1	0	0	0	0	0	0	0	24	0.2	0.6	0	0.622012	0.00261091
1000	1	0	0	0	0	0	0	0	25	0.2	0.6	0	0.632291	0.00253991
1000	1	0	0	0	0	0	0	0	26	0.2	0.6	0	0.641943	0.00247325
1000	1	0	0	0	0	0	0	0	27	0.2	0.6	0	0.651022	0.00241053
1000	1	0	0	0	0	0	0	0	28	0.2	0.6	0	0.659579	0.00235142
1000	1	0	0	0	0	0	0	0	29	0.2	0.6	0	0.667659	0.00229561
1000	1	0	0	0	0	0	0	0	30	0.2	0.6	0	0.675299	0.00224283
1000	1	0	0	0	0	0	0	0	0	0.2	0.7	0	0	0.00561256
1000	1	0	0	0	0	0	0	0	1	0.2	0.7	0	0.013837	0.0055349
1000	1	0	0	0	0	0	0	0	2	0.2	0.7	0	0.0504888	0.00532918
1000	1	0	0	0	0	0	0	0	3	0.2	0.7	0	0.0992154	0.00505568
1000	1	0	0	0	0	0	0	0	4	0.2	0.7	0	0.151008	0.00476498
1000	1	0	0	0	0	0	0	0	5	0.2	0.7	0	0.200843	0.00448527
1000	1	0	0	0	0	0	0	0	6	0.2	0.7	0	0.246648	0.00422818
1000	1	0	0	0	0	0	0	0	7	0.2	0.7	0	0.287912	0.00399658
1000	1	0	0	0	0	0	0	0	8	0.2	0.7	0	0.324813	0.00378947
1000	1	0	0	0	0	0	0	0	9	0.2	0.7	0	0.357778	0.00360445
1000	1	0	0	0	0	0	0	0	10	0.2	0.7	0	0.38729	0.00343881
1000	1	0	0	0	0	0	0	0	11	0.2	0.7	0	0.413807	0.00328998
1000	1	0	0	0	0	0	0	0	12	0.2	0.7	0	0.437737	0.00315567
1000	1	0	0	0	0	0	0	0	13	0.2	0.7	0	0.459427	0.00303393
1000	1	0	0	0	0	0	0	0	14	0.2	0.7	0	0.479175	0.0029231
1000	1	0	0	0	0	0	0	0	15	0.2	0.7	0	0.497231	0.00282176
1000	1	0	0	0	0	0	0	0	16	0.2	0.7	0	0.513807	0.00272872
1000	1	0	0	0	0	0	0	0	17	0.2	0.7	0	0.529082	0.00264299
1000	1	0	0	0	0	0	0	0	18	0.2	0.7	0	0.543208	0.00256371
1000	1	0	0	0	0	0	0	0	19	0.2	0.7	0	0.556314	0.00249015
1000	1	0	0	0	0	0	0	0	20	0.2	0.7	0	0.568511	0.0024217
1000	1	0	0	0	0	0	0	0	21	0.2	0.7	0	0.579895	0.00235781
1000	1	0	0	0	0	0	0	0	22	0.2	0.7	0	0.590547	0.00229802
1000	1	0	0	0	0	0	0	0	23	0.2	0.7	0	0.600541	0.00224193
1000	1	0	0	0	0	0	0	0	24	0.2	0.7	0	0.609937	0.00218919
1000	1	0	0	0	0	0	0	0	25	0.2	0.7	0	0.618791	0.0021395
1000	1	0	0	0	0	0	0	0	26	0.2	0.7	0	0.627151	0.00209258
1000	1	0	0	0	0	0	0	0	27	0.2	0.7	0	0.63506	0.00204819
1000	1	0	0	0	0	0	0	0	28	0.2	0.7	0	0.642555	0.00200613
1000	1	0	0	0	0	0	0	0	29	0.2	0.7	0	0.649669	0.0019662
1000	1	0	0	0	0	0	0	0	30	0.2	0.7	0	0.656434	0.00192823
1000	1	0	0	0	0	0	0	0	0	0.2	0.8	0	0	0.00295116
1000	1	0	0	0	0	0	0	0	1	0.2	0.8	0	0.00441503	0.00293813
1000	1	0	0	0	0	0	0	0	2	0.2	0.8	0	0.0167253	0.0029018
1000	1	0	0	0	0	0	0	0	3	0.2	0.8	0	0.0341073	0.00285051
1000	1	0	0	0	0	0	0	0	4	0.2	0.8	0	0.0539441	0.00279196
1000	1	0	0	0	0	0	0	0	5	0.2	0.8	0	0.0745087	0.00273127
1000	1	0	0	0	0	0	0	0	6	0.2	0.8	0	0.0948465	0.00267125
1000	1	0	0	0	0	0	0	0	7	0.2	0.8	0	0.114488	0.00261329
1000	1	0	0	0	0	0	0	0	8	0.2	0.8	0	0.137028	0.00254677
1000	1	0	0	0	0	0	0	0	9	0.2	0.8	0	0.160711	0.00247687
1000	1	0	0	0	0	0	0	0	10	0.2	0.8	0	0.183084	0.00241084
1000	1	0	0	0	0	0	0	0	11	0.2	0.8	0	0.20418	0.00234859
1000	1	0	0	0	0	0	0	0	12	0.2	0.8	0	0.224059	0.00228992
1000	1	0	0	0	0	0	0	0	13	0.2	0.8	0	0.242798	0.00223462
1000	1	0	0	0	0	0	0	0	14	0.2	0.8	0	0.260476	0.00218245
1000	1	0	0	0	0	0	0	0	15	0.2	0.8	0	0.27717	0.00213318
1000	1	0	0	0	0	0	0	0	16	0.2	0.8	0	0.292955	0.0020866
1000	1	0	0	0	0	0	0	0	17	0.2	0.8	0	0.307901	0.00204249
1000	1	0	0	0	0	0	0	0	18	0.2	0.8	0	0.322071	0.00200067
1000	1	0	0	0	0	0	0	0	19	0.2	0.8	0	0.335524	0.00196097
1000	1	0	0	0	0	0	0	0	20	0.2	0.8	0	0.348315	0.00192322
1000	1	0	0	0	0	0	0	0	21	0.2	0.8	0	0.360491	0.00188728
1000	1	0	0	0	0	0	0	0	22	0.2	0.8	0	0.372098	0.00185303
1000	1	0	0	0	0	0	0	0	23	0.2	0.8	0	0.383177	0.00182034
1000	1	0	0	0	0	0	0	0	24	0.2	0.8	0	0.393763	0.0017891
1000	1	0	0	0	0	0	0	0	25	0.2	0.8	0	0.40389	0.00175921
1000	1	0	0	0	0	0	0	0	26	0.2	0.8	0	0.41359	0.00173058
1000	1	0	0	0	0	0	0	0	27	0.2	0.8	0	0.422891	0.00170313
1000	1	0	0	0	0	0	0	0	28	0.2	0.8	0	0.431817	0.00167679
1000	1	0	0	0	0	0	0	0	29	0.2	0.8	0	0.440392	0.00165148
1000	1	0	0	0	0	0	0	0	30	0.2	0.8	0	0.448638	0.00162715
1000	1	0	0	0	0	0	0	0	0	0.2	0.9	0	0	0.00207726
1000	1	0	0	0	0	0	0	0	1	0.2	0.9	0	0.00295218	0.00207113
1000	1	0	0	0	0	0	0	0	2	0.2	0.9	0	0.0113063	0.00205377
1000	1	0	0	0	0	0	0	0	3	0.2	0.9	0	0.0232373	0.00202899
1000	1	0	0	0	0	0	0	0	4	0.2	0.9	0	0.0370297	0.00200034
1000	1	0	0	0	0	0	0	0	5	0.2	0.9	0	0.0515249	0.00197023
1000	1	0	0	0	0	0	0	0	6	0.2	0.9	0	0.0660589	0.00194004
1000	1	0	0	0	0	0	0	0	7	0.2	0.9	0	0.0802858	0.00191048
1000	1	0	0	0	0	0	0	0	8	0.2	0.9	0	0.0940403	0.00188191
1000	1	0	0	0	0	0	0	0	9	0.2	0.9	0	0.107255	0.00185446
1000	1	0	0	0	0	0	0	0	10	0.2	0.9	0	0.119913	0.00182817
1000	1	0	0	0	0	0	0	0	11	0.2	0.9	0	0.132025	0.00180301
1000	1	0	0	0	0	0	0	0	12	0.2	0.9	0	0.143614	0.00177893
1000	1	0	0	0	0	0	0	0	13	0.2	0.9	0	0.154709	0.00175589
1000	1	0	0	0	0	0	0	0	14	0.2	0.9	0	0.165341	0.0017338
1000	1	0	0	0	0	0	0	0	15	0.2	0.9	0	0.17554	0.00171261
1000	1	0	0	0	0	0	0	0	16	0.2	0.9	0	0.185335	0.00169227
1000	1	0	0	0	0	0	0	0	17	0.2	0.9	0	0.194752	0.00167271
1000	1	0	0	0	0	0	0	0	18	0.2	0.9	0	0.205004	0.00165141
1000	1	0	0	0	0	0	0	0	19	0.2	0.9	0	0.216565	0.00162739
1000	1	0	0	0	0	0	0	0	20	0.2	0.9	0	0.227707	0.00160425
1000	1	0	0	0	0	0	0	0	21	0.2	0.9	0	0.238452	0.00158193
1000	1	0	0	0	0	0	0	0	22	0.2	0.9	0	0.248821	0.00156039
1000	1	0	0	0	0	0	0	0	23	0.2	0.9	0	0.258834	0.00153959
1000	1	0	0	0	0	0	0	0	24	0.2	0.9	0	0.268507	0.0015195
1000	1	0	0	0	0	0	0	0	25	0.2	0.9	0	0.27786	0.00150007
1000	1	0	0	0	0	0	0	0	26	0.2	0.9	0	0.286907	0.00148128
1000	1	0	0	0	0	0	0	0	27	0.2	0.9	0	0.295664	0.00146308
1000	1	0	0	0	0	0	0	0	28	0.2	0.9	0	0.304146	0.00144547
1000	1	0	0	0	0	0	0	0	29	0.2	0.9	0	0.312366	0.00142839
1000	1	0	0	0	0	0	0	0	30	0.2	0.9	0	0.320336	0.00141183
1000	1	0	0	0	0	0	0	0	0	0.4	0.3	0	0	0.00108038
1000	1	0	0	0	0	0	0	0	1	0.4	0.3	0	5.12919e-05	0.00108032
1000	1	0	0	0	0	0	0	0	2	0.4	0.3	0	0.000209179	0.00108015
1000	1	0	0	0	0	0	0	0	3	0.4	0.3	0	0.000473286	0.00107987
1000	1	0	0	0	0	0	0	0	4	0.4	0.3	0	0.000843135	0.00107947
1000	1	0	0	0	0	0	0	0	5	0.4	0.3	0	0.00131815	0.00107896
1000	1	0	0	0	0	0	0	0	6	0.4	0.3	0	0.00189764	0.00107833
1000	1	0	0	0	0	0	0	0	7	0.4	0.3	0	0.00258083	0.00107759
1000	1	0	0	0	0	0	0	0	8	0.4	0.3	0	0.00336684	0.00107674
1000	1	0	0	0	0	0	0	0	9	0.4	0.3	0	0.00425469	0.00107578
1000	1	0	0	0	0	0	0	0	10	0.4	0.3	0	0.00524332	0.00107471
1000	1	0	0	0	0	0	0	0	11	0.4	0.3	0	0.00633158	0.00107354
1000	1	0	0	0	0	0	0	0	12	0.4	0.3	0	0.00751821	0.00107226
1000	1	0	0	0	0	0	0	0	13	0.4	0.3	0	0.00880189	0.00107087
1000	1	0	0	0	0	0	0	0	14	0.4	0.3	0	0.0101812	0.00106938
1000	1	0	0	0	0	0	0	0	15	0.4	0.3	0	0.0116547	0.00106779
1000	1	0	0	0	0	0	0	0	16	0.4	0.3	0	0.0132207	0.0010661
1000	1	0	0	0	0	0	0	0	17	0.4	0.3	0	0.0148777	0.00106431
1000	1	0	0	0	0	0	0	0	18	0.4	0.3	0	0.016624	0.00106242
1000	1	0	0	0	0	0	0	0	19	0.4	0.3	0	0.0184578	0.00106044
1000	1	0	0	0	0	0	0	0	20	0.4	0.3	0	0.0203772	0.00105836
1000	1	0	0	0	0	0	0	0	21	0.4	0.3	0	0.0223805	0.0010562
1000	1	0	0	0	0	0	0	0	22	0.4	0.3	0	0.0244657	0.00105395
1000	1	0	0	0	0	0	0	0	23	0.4	0.3	0	0.0266308	0.00105161
1000	1	0	0	0	0	0	0	0	24	0.4	0.3	0	0.0288738	0.00104918
1000	1	0	0	0	0	0	0	0	25	0.4	0.3	0	0.0311927	0.00104668
1000	1	0	0	0	0	0	0	0	26	0.4	0.3	0	0.0335855	0.00104409
1000	1	0	0	0	0	0	0	0	27	0.4	0.3	0	0.0360499	0.00104143
1000	1	0	0	0	0	0	0	0	28	0.4	0.3	0	0.0385839	0.00103869
1000	1	0	0	0	0	0	0	0	29	0.4	0.3	0	0.0411854	0.00103588
1000	1	0	0	0	0	0	0	0	30	0.4	0.3	0	0.0438522	0.001033
1000	1	0	0	0	0	0	0	0	0	0.4	0.4	0	0	0.0017748
1000	1	0	0	0	0	0	0	0	1	0.4	0.4	0	0.000155533	0.00177453
1000	1	0	0	0	0	0	0	0	2	0.4	0.4	0	0.000629386	0.00177368
1000	1	0	0	0	0	0	0	0	3	0.4	0.4	0	0.00141964	0.00177228
1000	1	0	0	0	0	0	0	0	4	0.4	0.4	0	0.00252341	0.00177032
1000	1	0	0	0	0	0	0	0	5	0.4	0.4	0	0.00393682	0.00176781
1000	1	0	0	0	0	0	0	0	6	0.4	0.4	0	0.00565508	0.00176476
1000	1	0	0	0	0	0	0	0	7	0.4	0.4	0	0.00767253	0.00176118
1000	1	0	0	0	0	0	0	0	8	0.4	0.4	0	0.00998264	0.00175708
1000	1	0	0	0	0	0	0	0	9	0.4	0.4	0	0.0125781	0.00175248
1000	1	0	0	0	0	0	0	0	10	0.4	0.4	0	0.0154509	0.00174738
1000	1	0	0	0	0	0	0	0	11	0.4	0.4	0	0.0185924	0.0017418
1000	1	0	0	0	0	0	0	0	12	0.4	0.4	0	0.0219932	0.00173577
1000	1	0	0	0	0	0	0	0	13	0.4	0.4	0	0.0256437	0.00172929
1000	1	0	0	0	0	0	0	0	14	0.4	0.4	0	0.0295334	0.00172238
1000	1	0	0	0	0	0	0	0	15	0.4	0.4	0	0.0336517	0.00171508
1000	1	0	0	0	0	0	0	0	16	0.4	0.4	0	0.0379878	0.00170738
1000	1	0	0	0	0	0	0	0	17	0.4	0.4	0	0.0425303	0.00169932
1000	1	0	0	0	0	0	0	0	18	0.4	0.4	0	0.047268	0.00169091
1000	1	0	0	0	0	0	0	0	19	0.4	0.4	0	0.0521893	0.00168217
1000	1	0	0	0	0	0	0	0	20	0.4	0.4	0	0.0572827	0.00167313
1000	1	0	0	0	0	0	0	0	21	0.4	0.4	0	0.0625368	0.00166381
1000	1	0	0	0	0	0	0	0	22	0.4	0.4	0	0.0679399	0.00165422
1000	1	0	0	0	0	0	0	0	23	0.4	0.4	0	0.0734809	0.00164439
1000	1	0	0	0	0	0	0	0	24	0.4	0.4	0	0.0791486	0.00163433
1000	1	0	0	0	0	0	0	0	25	0.4	0.4	0	0.084932	0.00162406
1000	1	0	0	0	0	0	0	0	26	0.4	0.4	0	0.0908204	0.00161361
1000	1	0	0	0	0	0	0	0	27	0.4	0.4	0	0.0968035	0.00160299
1000	1	0	0	0	0	0	0	0	28	0.4	0.4	0	0.102871	0.00159222
1000	1	0	0	0	0	0	0	0	29	0.4	0.4	0	0.109013	0.00158132
1000	1	0	0	0	0	0	0	0	30	0.4	0.4	0	0.115221	0.00157031
1000	1	0	0	0	0	0	0	0	0	0.4	0.5	0	0	0.00299493
1000	1	0	0	0	0	0	0	0	1	0.4	0.5	0	0.000607204	0.00299312
1000	1	0	0	0	0	0	0	0	2	0.4	0.5	0	0.00244259	0.00298762
1000	1	0	0	0	0	0	0	0	3	0.4	0.5	0	0.00548186	0.00297852
1000	1	0	0	0	0	0	0	0	4	0.4	0.5	0	0.00968619	0.00296592
1000	1	0	0	0	0	0	0	0	5	0.4	0.5	0	0.0150035	0.00295
1000	1	0	0	0	0	0	0	0	6	0.4	0.5	0	0.0213704	0.00293093
1000	1	0	0	0	0	0	0	0	7	0.4	0.5	0	0.0287137	0.00290894
1000	1	0	0	0	0	0	0	0	8	0.4	0.5	0	0.0369533	0.00288426
1000	1	0	0	0	0	0	0	0	9	0.4	0.5	0	0.0460038	0.00285715
1000	1	0	0	0	0	0	0	0	10	0.4	0.5	0	0.0557768	0.00282788
1000	1	0	0	0	0	0	0	0	11	0.4	0.5	0	0.0661832	0.00279672
1000	1	0	0	0	0	0	0	0	12	0.4	0.5	0	0.0771346	0.00276392
1000	1	0	0	0	0	0	0	0	13	0.4	0.5	0	0.0885453	0.00272974
1000	1	0	0	0	0	0	0	0	14	0.4	0.5	0	0.100333	0.00269444
1000	1	0	0	0	0	0	0	0	15	0.4	0.5	0	0.11242	0.00265824
1000	1	0	0	0	0	0	0	0	16	0.4	0.5	0	0.124734	0.00262136
1000	1	0	0	0	0	0	0	0	17	0.4	0.5	0	0.137209	0.002584
1000	1	0	0	0	0	0	0	0	18	0.4	0.5	0	0.149785	0.00254633
1000	1	0	0	0	0	0	0	0	19	0.4	0.5	0	0.162406	0.00250853
1000	1	0	0	0	0	0	0	0	20	0.4	0.5	0	0.175025	0.00247074
1000	1	0	0	0	0	0	0	0	21	0.4	0.5	0	0.187599	0.00243308
1000	1	0	0	0	0	0	0	0	22	0.4	0.5	0	0.200091	0.00239567
1000	1	0	0	0	0	0	0	0	23	0.4	0.5	0	0.212469	0.0023586
1000	1	0	0	0	0	0	0	0	24	0.4	0.5	0	0.224705	0.00232195
1000	1	0	0	0	0	0	0	0	25	0.4	0.5	0	0.236777	0.00228579
1000	1	0	0	0	0	0	0	0	26	0.4	0.5	0	0.248666	0.00225019
1000	1	0	0	0	0	0	0	0	27	0.4	0.5	0	0.260356	0.00221518
1000	1	0	0	0	0	0	0	0	28	0.4	0.5	0	0.271834	0.0021808
1000	1	0	0	0	0	0	0	0	29	0.4	0.5	0	0.283091	0.00214708
1000	1	0	0	0	0	0	0	0	30	0.4	0.5	0	0.29412	0.00211405
1000	1	0	0	0	0	0	0	0	0	0.4	0.6	0	0	0.00497742
1000	1	0	0	0	0	0	0	0	1	0.4	0.6	0	0.00309358	0.00496202
1000	1	0	0	0	0	0	0	0	2	0.4	0.6	0	0.0122606	0.00491639
1000	1	0	0	0	0	0	0	0	3	0.4	0.6	0	0.0268987	0.00484353
1000	1	0	0	0	0	0	0	0	4	0.4	0.6	0	0.0461254	0.00474782
1000	1	0	0	0	0	0	0	0	5	0.4	0.6	0	0.0689163	0.00463438
1000	1	0	0	0	0	0	0	0	6	0.4	0.6	0	0.0942351	0.00450835
1000	1	0	0	0	0	0	0	0	7	0.4	0.6	0	0.121132	0.00437447
1000	1	0	0	0	0	0	0	0	8	0.4	0.6	0	0.148799	0.00423676
1000	1	0	0	0	0	0	0	0	9	0.4	0.6	0	0.176593	0.00409841
1000	1	0	0	0	0	0	0	0	10	0.4	0.6	0	0.204029	0.00396185
1000	1	0	0	0	0	0	0	0	11	0.4	0.6	0	0.230761	0.00382879
1000	1	0	0	0	0	0	0	0	12	0.4	0.6	0	0.256557	0.00370039
1000	1	0	0	0	0	0	0	0	13	0.4	0.6	0	0.281276	0.00357735
1000	1	0	0	0	0	0	0	0	14	0.4	0.6	0	0.30484	0.00346006
1000	1	0	0	0	0	0	0	0	15	0.4	0.6	0	0.327224	0.00334864
1000	1	0	0	0	0	0	0	0	16	0.4	0.6	0	0.348433	0.00324308
1000	1	0	0	0	0	0	0	0	17	0.4	0.6	0	0.368498	0.0031432
1000	1	0	0	0	0	0	0	0	18	0.4	0.6	0	0.387462	0.00304881
1000	1	0	0	0	0	0	0	0	19	0.4	0.6	0	0.405378	0.00295964
1000	1	0	0	0	0	0	0	0	20	0.4	0.6	0	0.422304	0.00287539
1000	1	0	0	0	0	0	0	0	21	0.4	0.6	0	0.438298	0.00279578
1000	1	0	0	0	0	0	0	0	22	0.4	0.6	0	0.453419	0.00272052
1000	1	0	0	0	0	0	0	0	23	0.4	0.6	0	0.467723	0.00264932
1000	1	0	0	0	0	0	0	0	24	0.4	0.6	0	0.481266	0.00258191
1000	1	0	0	0	0	0	0	0	25	0.4	0.6	0	0.494098	0.00251804
1000	1	0	0	0	0	0	0	0	26	0.4	0.6	0	0.506268	0.00245746
1000	1	0	0	0	0	0	0	0	27	0.4	0.6	0	0.517821	0.00239996
1000	1	0	0	0	0	0	0	0	28	0.4	0.6	0	0.5288	0.00234532
1000	1	0	0	0	0	0	0	0	29	0.4	0.6	0	0.539242	0.00229334
1000	1	0	0	0	0	0	0	0	30	0.4	0.6	0	0.549184	0.00224386
1000	1	0	0	0	0	0	0	0	0	0.4	0.7	0	0	0.00442598
1000	1	0	0	0	0	0	0	0	1	0.4	0.7	0	0.00449786	0.00440607
1000	1	0	0	0	0	0	0	0	2	0.4	0.7	0	0.0177447	0.00434744
1000	1	0	0	0	0	0	0	0	3	0.4	0.7	0	0.0382639	0.00425662
1000	1	0	0	0	0	0	0	0	4	0.4	0.7	0	0.0640963	0.00414228
1000	1	0	0	0	0	0	0	0	5	0.4	0.7	0	0.0932608	0.00401319
1000	1	0	0	0	0	0	0	0	6	0.4	0.7	0	0.124064	0.00387686
1000	1	0	0	0	0	0	0	0	7	0.4	0.7	0	0.15522	0.00373896
1000	1	0	0	0	0	0	0	0	8	0.4	0.7	0	0.185844	0.00360341
1000	1	0	0	0	0	0	0	0	9	0.4	0.7	0	0.215379	0.00347269
1000	1	0	0	0	0	0	0	0	10	0.4	0.7	0	0.243509	0.00334818
1000	1	0	0	0	0	0	0	0	11	0.4	0.7	0	0.270086	0.00323055
1000	1	0	0	0	0	0	0	0	12	0.4	0.7	0	0.295069	0.00311998
1000	1	0	0	0	0	0	0	0	13	0.4	0.7	0	0.318487	0.00301633
1000	1	0	0	0	0	0	0	0	14	0.4	0.7	0	0.340404	0.00291932
1000	1	0	0	0	0	0	0	0	15	0.4	0.7	0	0.360909	0.00282857
1000	1	0	0	0	0	0	0	0	16	0.4	0.7	0	0.380098	0.00274364
1000	1	0	0	0	0	0	0	0	17	0.4	0.7	0	0.398067	0.00266411
1000	1	0	0	0	0	0	0	0	18	0.4	0.7	0	0.414911	0.00258956
1000	1	0	0	0	0	0	0	0	19	0.4	0.7	0	0.430722	0.00251958
1000	1	0	0	0	0	0	0	0	20	0.4	0.7	0	0.445582	0.00245381
1000	1	0	0	0	0	0	0	0	21	0.4	0.7	0	0.459569	0.0023919
1000	1	0	0	0	0	0	0	0	22	0.4	0.7	0	0.472754	0.00233355
1000	1	0	0	0	0	0	0	0	23	0.4	0.7	0	0.485201	0.00227845
1000	1	0	0	0	0	0	0	0	24	0.4	0.7	0	0.49697	0.00222637
1000	1	0	0	0	0	0	0	0	25	0.4	0.7	0	0.508112	0.00217705
1000	1	0	0	0	0	0	0	0	26	0.4	0.7	0	0.518677	0.00213029
1000	1	0	0	0	0	0	0	0	27	0.4	0.7	0	0.528709	0.00208589
1000	1	0	0	0	0	0	0	0	28	0.4	0.7	0	0.538246	0.00204368
1000	1	0	0	0	0	0	0	0	29	0.4	0.7	0	0.547325	0.0020035
1000	1	0	0	0	0	0	0	0	30	0.4	0.7	0	0.555979	0.0019652
1000	1	0	0	0	0	0	0	0	0	0.4	0.8	0	0	0.00282454
1000	1	0	0	0	0	0	0	0	1	0.4	0.8	0	0.00225325	0.00281817
1000	1	0	0	0	0	0	0	0	2	0.4	0.8	0	0.00914931	0.0027987
1000	1	0	0	0	0	0	0	0	3	0.4	0.8	0	0.0201105	0.00276774
1000	1	0	0	0	0	0	0	0	4	0.4	0.8	0	0.0343359	0.00272755
1000	1	0	0	0	0	0	0	0	5	0.4	0.8	0	0.0509631	0.00268059
1000	1	0	0	0	0	0	0	0	6	0.4	0.8	0	0.0691918	0.0026291
1000	1	0	0	0	0	0	0	0	7	0.4	0.8	0	0.0883498	0.00257499
1000	1	0	0	0	0	0	0	0	8	0.4	0.8	0	0.107912	0.00251973
1000	1	0	0	0	0	0	0	0	9	0.4	0.8	0	0.127491	0.00246443
1000	1	0	0	0	0	0	0	0	10	0.4	0.8	0	0.146811	0.00240986
1000	1	0	0	0	0	0	0	0	11	0.4	0.8	0	0.165688	0.00235654
1000	1	0	0	0	0	0	0	0	12	0.4	0.8	0	0.184005	0.0023048
1000	1	0	0	0	0	0	0	0	13	0.4	0.8	0	0.20169	0.00225485
1000	1	0	0	0	0	0	0	0	14	0.4	0.8	0	0.218708	0.00220678
1000	1	0	0	0	0	0	0	0	15	0.4	0.8	0	0.235049	0.00216063
1000	1	0	0	0	0	0	0	0	16	0.4	0.8	0	0.250714	0.00211638
1000	1	0	0	0	0	0	0	0	17	0.4	0.8	0	0.265721	0.00207399
1000	1	0	0	0	0	0	0	0	18	0.4	0.8	0	0.280089	0.00203341
1000	1	0	0	0	0	0	0	0	19	0.4	0.8	0	0.293846	0.00199455
1000	1	0	0	0	0	0	0	0	20	0.4	0.8	0	0.307018	0.00195735
1000	1	0	0	0	0	0	0	0	21	0.4	0.8	0	0.319635	0.00192171
1000	1	0	0	0	0	0	0	0	22	0.4	0.8	0	0.331725	0.00188756
1000	1	0	0	0	0	0	0	0	23	0.4	0.8	0	0.343316	0.00185482
1000	1	0	0	0	0	0	0	0	24	0.4	0.8	0	0.354436	0.00182341
1000	1	0	0	0	0	0	0	0	25	0.4	0.8	0	0.36511	0.00179326
1000	1	0	0	0	0	0	0	0	26	0.4	0.8	0	0.375364	0.0017643
1000	1	0	0	0	0	0	0	0	27	0.4	0.8	0	0.38522	0.00173646
1000	1	0	0	0	0	0	0	0	28	0.4	0.8	0	0.394701	0.00170968
1000	1	0	0	0	0	0	0	0	29	0.4	0.8	0	0.403827	0.0016839
1000	1	0	0	0	0	0	0	0	30	0.4	0.8	0	0.412618	0.00165908
1000	1	0	0	0	0	0	0	0	0	0.4	0.9	0	0	0.00201261
1000	1	0	0	0	0	0	0	0	1	0.4	0.9	0	0.00106506	0.00201047
1000	1	0	0	0	0	0	0	0	2	0.4	0.9	0	0.00448501	0.00200359
1000	1	0	0	0	0	0	0	0	3	0.4	0.9	0	0.00999284	0.0019925
1000	1	0	0	0	0	0	0	0	4	0.4	0.9	0	0.0172175	0.00197796
1000	1	0	0	0	0	0	0	0	5	0.4	0.9	0	0.0257576	0.00196077
1000	1	0	0	0	0	0	0	0	6	0.4	0.9	0	0.0352378	0.00194169
1000	1	0	0	0	0	0	0	0	7	0.4	0.9	0	0.0453387	0.00192136
1000	1	0	0	0	0	0	0	0	8	0.4	0.9	0	0.0558062	0.0019003
1000	1	0	0	0	0	0	0	0	9	0.4	0.9	0	0.0664468	0.00187888
1000	1	0	0	0	0	0	0	0	10	0.4	0.9	0	0.0771187	0.0018574
1000	1	0	0	0	0	0	0	0	11	0.4	0.9	0	0.0877206	0.00183607
1000	1	0	0	0	0	0	0	0	12	0.4	0.9	0	0.0981822	0.00181501
1000	1	0	0	0	0	0	0	0	13	0.4	0.9	0	0.108456	0.00179433
1000	1	0	0	0	0	0	0	0	14	0.4	0.9	0	0.118518	0.00177408
1000	1	0	0	0	0	0	0	0	15	0.4	0.9	0	0.131539	0.00174788
1000	1	0	0	0	0	0	0	0	16	0.4	0.9	0	0.144224	0.00172235
1000	1	0	0	0	0	0	0	0	17	0.4	0.9	0	0.156561	0.00169751
1000	1	0	0	0	0	0	0	0	18	0.4	0.9	0	0.168548	0.00167339
1000	1	0	0	0	0	0	0	0	19	0.4	0.9	0	0.180183	0.00164997
1000	1	0	0	0	0	0	0	0	20	0.4	0.9	0	0.191472	0.00162725
1000	1	0	0	0	0	0	0	0	21	0.4	0.9	0	0.202421	0.00160522
1000	1	0	0	0	0	0	0	0	22	0.4	0.9	0	0.21304	0.00158385
1000	1	0	0	0	0	0	0	0	23	0.4	0.9	0	0.223336	0.00156312
1000	1	0	0	0	0	0	0	0	24	0.4	0.9	0	0.233322	0.00154302
1000	1	0	0	0	0	0	0	0	25	0.4	0.9	0	0.243008	0.00152353
1000	1	0	0	0	0	0	0	0	26	0.4	0.9	0	0.252404	0.00150462
1000	1	0	0	0	0	0	0	0	27	0.4	0.9	0	0.261523	0.00148627
1000	1	0	0	0	0	0	0	0	28	0.4	0.9	0	0.270373	0.00146845
1000	1	0	0	0	0	0	0	0	29	0.4	0.9	0	0.278967	0.00145116
1000	1	0	0	0	0	0	0	0	30	0.4	0.9	0	0.287315	0.00143436
1000	1	0	0	0	0	0	0	0	0	0.6	0.3	0	0	0.000937022
1000	1	0	0	0	0	0	0	0	1	0.6	0.3	0	3.2064e-05	0.000936992
1000	1	0	0	0	0	0	0	0	2	0.6	0.3	0	0.000134381	0.000936896
1000	1	0	0	0	0	0	0	0	3	0.6	0.3	0	0.000306742	0.000936734
1000	1	0	0	0	0	0	0	0	4	0.6	0.3	0	0.000548893	0.000936507
1000	1	0	0	0	0	0	0	0	5	0.6	0.3	0	0.000860538	0.000936215
1000	1	0	0	0	0	0	0	0	6	0.6	0.3	0	0.00124134	0.000935859
1000	1	0	0	0	0	0	0	0	7	0.6	0.3	0	0.00169091	0.000935437
1000	1	0	0	0	0	0	0	0	8	0.6	0.3	0	0.00220884	0.000934952
1000	1	0	0	0	0	0	0	0	9	0.6	0.3	0	0.00279465	0.000934403
1000	1	0	0	0	0	0	0	0	10	0.6	0.3	0	0.00344783	0.000933791
1000	1	0	0	0	0	0	0	0	11	0.6	0.3	0	0.00416786	0.000933116
1000	1	0	0	0	0	0	0	0	12	0.6	0.3	0	0.00495413	0.00093238
1000	1	0	0	0	0	0	0	0	13	0.6	0.3	0	0.00580603	0.000931581
1000	1	0	0	0	0	0	0	0	14	0.6	0.3	0	0.00672289	0.000930722
1000	1	0	0	0	0	0	0	0	15	0.6	0.3	0	0.00770403	0.000929803
1000	1	0	0	0	0	0	0	0	16	0.6	0.3	0	0.00874871	0.000928824
1000	1	0	0	0	0	0	0	0	17	0.6	0.3	0	0.00985616	0.000927786
1000	1	0	0	0	0	0	0	0	18	0.6	0.3	0	0.0110256	0.000926691
1000	1	0	0	0	0	0	0	0	19	0.6	0.3	0	0.0122562	0.000925537
1000	1	0	0	0	0	0	0	0	20	0.6	0.3	0	0.013547	0.000924328
1000	1	0	0	0	0	0	0	0	21	0.6	0.3	0	0.0148973	0.000923062
1000	1	0	0	0	0	0	0	0	22	0.6	0.3	0	0.0163061	0.000921742
1000	1	0	0	0	0	0	0	0	23	0.6	0.3	0	0.0177724	0.000920369
1000	1	0	0	0	0	0	0	0	24	0.6	0.3	0	0.0192953	0.000918942
1000	1	0	0	0	0	0	0	0	25	0.6	0.3	0	0.0208738	0.000917462
1000	1	0	0	0	0	0	0	0	26	0.6	0.3	0	0.0225069	0.000915932
1000	1	0	0	0	0	0	0	0	27	0.6	0.3	0	0.0241935	0.000914352
1000	1	0	0	0	0	0	0	0	28	0.6	0.3	0	0.0259326	0.000912722
1000	1	0	0	0	0	0	0	0	29	0.6	0.3	0	0.0277232	0.000911044
1000	1	0	0	0	0	0	0	0	30	0.6	0.3	0	0.0295641	0.000909319
1000	1	0	0	0	0	0	0	0	0	0.6	0.4	0	0	0.00151382
1000	1	0	0	0	0	0	0	0	1	0.6	0.4	0	9.47911e-05	0.00151367
1000	1	0	0	0	0	0	0	0	2	0.6	0.4	0	0.000390203	0.00151323
1000	1	0	0	0	0	0	0	0	3	0.6	0.4	0	0.000885383	0.00151248
1000	1	0	0	0	0	0	0	0	4	0.6	0.4	0	0.00157909	0.00151143
1000	1	0	0	0	0	0	0	0	5	0.6	0.4	0	0.00246969	0.00151008
1000	1	0	0	0	0	0	0	0	6	0.6	0.4	0	0.00355517	0.00150844
1000	1	0	0	0	0	0	0	0	7	0.6	0.4	0	0.00483317	0.0015065
1000	1	0	0	0	0	0	0	0	8	0.6	0.4	0	0.00630096	0.00150428
1000	1	0	0	0	0	0	0	0	9	0.6	0.4	0	0.00795547	0.00150177
1000	1	0	0	0	0	0	0	0	10	0.6	0.4	0	0.00979332	0.00149899
1000	1	0	0	0	0	0	0	0	11	0.6	0.4	0	0.0118108	0.00149594
1000	1	0	0	0	0	0	0	0	12	0.6	0.4	0	0.0140039	0.00149262
1000	1	0	0	0	0	0	0	0	13	0.6	0.4	0	0.0163685	0.00148904
1000	1	0	0	0	0	0	0	0	14	0.6	0.4	0	0.0189	0.00148521
1000	1	0	0	0	0	0	0	0	15	0.6	0.4	0	0.0215936	0.00148113
1000	1	0	0	0	0	0	0	0	16	0.6	0.4	0	0.0244446	0.00147681
1000	1	0	0	0	0	0	0	0	17	0.6	0.4	0	0.0274477	0.00147227
1000	1	0	0	0	0	0	0	0	18	0.6	0.4	0	0.0305978	0.0014675
1000	1	0	0	0	0	0	0	0	19	0.6	0.4	0	0.0338893	0.00146251
1000	1	0	0	0	0	0	0	0	20	0.6	0.4	0	0.0373169	0.00145733
1000	1	0	0	0	0	0	0	0	21	0.6	0.4	0	0.0408749	0.00145194
1000	1	0	0	0	0	0	0	0	22	0.6	0.4	0	0.0445577	0.00144636
1000	1	0	0	0	0	0	0	0	23	0.6	0.4	0	0.0483594	0.00144061
1000	1	0	0	0	0	0	0	0	24	0.6	0.4	0	0.0522745	0.00143468
1000	1	0	0	0	0	0	0	0	25	0.6	0.4	0	0.0562971	0.00142859
1000	1	0	0	0	0	0	0	0	26	0.6	0.4	0	0.0604215	0.00142235
1000	1	0	0	0	0	0	0	0	27	0.6	0.4	0	0.0646419	0.00141596
1000	1	0	0	0	0	0	0	0	28	0.6	0.4	0	0.0689528	0.00140943
1000	1	0	0	0	0	0	0	0	29	0.6	0.4	0	0.0733484	0.00140278
1000	1	0	0	0	0	0	0	0	30	0.6	0.4	0	0.0778232	0.00139601
1000	1	0	0	0	0	0	0	0	0	0.6	0.5	0	0	0.00244011
1000	1	0	0	0	0	0	0	0	1	0.6	0.5	0	0.000325993	0.00243931
1000	1	0	0	0	0	0	0	0	2	0.6	0.5	0	0.00132898	0.00243687
1000	1	0	0	0	0	0	0	0	3	0.6	0.5	0	0.00300133	0.00243279
1000	1	0	0	0	0	0	0	0	4	0.6	0.5	0	0.00533082	0.0024271
1000	1	0	0	0	0	0	0	0	5	0.6	0.5	0	0.00830096	0.00241985
1000	1	0	0	0	0	0	0	0	6	0.6	0.5	0	0.0118912	0.00241109
1000	1	0	0	0	0	0	0	0	7	0.6	0.5	0	0.0160774	0.00240088
1000	1	0	0	0	0	0	0	0	8	0.6	0.5	0	0.0208323	0.00238928
1000	1	0	0	0	0	0	0	0	9	0.6	0.5	0	0.0261257	0.00237636
1000	1	0	0	0	0	0	0	0	10	0.6	0.5	0	0.0319253	0.00236221
1000	1	0	0	0	0	0	0	0	11	0.6	0.5	0	0.0381972	0.0023469
1000	1	0	0	0	0	0	0	0	12	0.6	0.5	0	0.0449059	0.00233053
1000	1	0	0	0	0	0	0	0	13	0.6	0.5	0	0.0520156	0.00231318
1000	1	0	0	0	0	0	0	0	14	0.6	0.5	0	0.0594898	0.00229495
1000	1	0	0	0	0	0	0	0	15	0.6	0.5	0	0.0672922	0.00227591
1000	1	0	0	0	0	0	0	0	16	0.6	0.5	0	0.0753871	0.00225615
1000	1	0	0	0	0	0	0	0	17	0.6	0.5	0	0.0837396	0.00223577
1000	1	0	0	0	0	0	0	0	18	0.6	0.5	0	0.0923156	0.00221485
1000	1	0	0	0	0	0	0	0	19	0.6	0.5	0	0.101083	0.00219345
1000	1	0	0	0	0	0	0	0	20	0.6	0.5	0	0.11001	0.00217167
1000	1	0	0	0	0	0	0	0	21	0.6	0.5	0	0.119067	0.00214957
1000	1	0	0	0	0	0	0	0	22	0.6	0.5	0	0.128228	0.00212722
1000	1	0	0	0	0	0	0	0	23	0.6	0.5	0	0.137465	0.00210468
1000	1	0	0	0	0	0	0	0	24	0.6	0.5	0	0.146755	0.00208201
1000	1	0	0	0	0	0	0	0	25	0.6	0.5	0	0.156075	0.00205926
1000	1	0	0	0	0	0	0	0	26	0.6	0.5	0	0.165406	0.0020365
1000	1	0	0	0	0	0	0	0	27	0.6	0.5	0	0.174729	0.00201375
1000	1	0	0	0	0	0	0	0	28	0.6	0.5	0	0.184026	0.00199106
1000	1	0	0	0	0	0	0	0	29	0.6	0.5	0	0.193282	0.00196848
1000	1	0	0	0	0	0	0	0	30	0.6	0.5	0	0.202484	0.00194602
1000	1	0	0	0	0	0	0	0	0	0.6	0.6	0	0	0.00376758
1000	1	0	0	0	0	0	0	0	1	0.6	0.6	0	0.00126523	0.00376281
1000	1	0	0	0	0	0	0	0	2	0.6	0.6	0	0.00511586	0.00374831
1000	1	0	0	0	0	0	0	0	3	0.6	0.6	0	0.0114419	0.00372447
1000	1	0	0	0	0	0	0	0	4	0.6	0.6	0	0.0200704	0.00369196
1000	1	0	0	0	0	0	0	0	5	0.6	0.6	0	0.0307782	0.00365162
1000	1	0	0	0	0	0	0	0	6	0.6	0.6	0	0.0433075	0.00360441
1000	1	0	0	0	0	0	0	0	7	0.6	0.6	0	0.0573811	0.00355139
1000	1	0	0	0	0	0	0	0	8	0.6	0.6	0	0.0727176	0.0034936
1000	1	0	0	0	0	0	0	0	9	0.6	0.6	0	0.0890435	0.00343209
1000	1	0	0	0	0	0	0	0	10	0.6	0.6	0	0.106102	0.00336782
1000	1	0	0	0	0	0	0	0	11	0.6	0.6	0	0.123662	0.00330166
1000	1	0	0	0	0	0	0	0	12	0.6	0.6	0	0.141516	0.0032344
1000	1	0	0	0	0	0	0	0	13	0.6	0.6	0	0.159489	0.00316668
1000	1	0	0	0	0	0	0	0	14	0.6	0.6	0	0.177431	0.00309908
1000	1	0	0	0	0	0	0	0	15	0.6	0.6	0	0.19522	0.00303206
1000	1	0	0	0	0	0	0	0	16	0.6	0.6	0	0.212759	0.00296598
1000	1	0	0	0	0	0	0	0	17	0.6	0.6	0	0.229969	0.00290114
1000	1	0	0	0	0	0	0	0	18	0.6	0.6	0	0.246793	0.00283775
1000	1	0	0	0	0	0	0	0	19	0.6	0.6	0	0.263187	0.00277598
1000	1	0	0	0	0	0	0	0	20	0.6	0.6	0	0.279122	0.00271595
1000	1	0	0	0	0	0	0	0	21	0.6	0.6	0	0.294577	0.00265772
1000	1	0	0	0	0	0	0	0	22	0.6	0.6	0	0.309543	0.00260133
1000	1	0	0	0	0	0	0	0	23	0.6	0.6	0	0.324016	0.00254681
1000	1	0	0	0	0	0	0	0	24	0.6	0.6	0	0.337997	0.00249413
1000	1	0	0	0	0	0	0	0	25	0.6	0.6	0	0.351494	0.00244328
1000	1	0	0	0	0	0	0	0	26	0.6	0.6	0	0.364514	0.00239423
1000	1	0	0	0	0	0	0	0	27	0.6	0.6	0	0.37707	0.00234692
1000	1	0	0	0	0	0	0	0	28	0.6	0.6	0	0.389174	0.00230131
1000	1	0	0	0	0	0	0	0	29	0.6	0.6	0	0.400843	0.00225735
1000	1	0	0	0	0	0	0	0	30	0.6	0.6	0	0.41209	0.00221498
1000	1	0	0	0	0	0	0	0	0	0.6	0.7	0	0	0.00385208
1000	1	0	0	0	0	0	0	0	1	0.6	0.7	0	0.00219248	0.00384363
1000	1	0	0	0	0	0	0	0	2	0.6	0.7	0	0.00888884	0.00381784
1000	1	0	0	0	0	0	0	0	3	0.6	0.7	0	0.0197178	0.00377612
1000	1	0	0	0	0	0	0	0	4	0.6	0.7	0	0.0341239	0.00372063
1000	1	0	0	0	0	0	0	0	5	0.6	0.7	0	0.0514438	0.00365391
1000	1	0	0	0	0	0	0	0	6	0.6	0.7	0	0.0709831	0.00357864
1000	1	0	0	0	0	0	0	0	7	0.6	0.7	0	0.0920782	0.00349738
1000	1	0	0	0	0	0	0	0	8	0.6	0.7	0	0.114139	0.0034124
1000	1	0	0	0	0	0	0	0	9	0.6	0.7	0	0.136668	0.00332561
1000	1	0	0	0	0	0	0	0	10	0.6	0.7	0	0.159267	0.00323856
1000	1	0	0	0	0	0	0	0	11	0.6	0.7	0	0.181633	0.0031524
1000	1	0	0	0	0	0	0	0	12	0.6	0.7	0	0.20354	0.00306801
1000	1	0	0	0	0	0	0	0	13	0.6	0.7	0	0.224831	0.002986
1000	1	0	0	0	0	0	0	0	14	0.6	0.7	0	0.245403	0.00290675
1000	1	0	0	0	0	0	0	0	15	0.6	0.7	0	0.265193	0.00283052
1000	1	0	0	0	0	0	0	0	16	0.6	0.7	0	0.284172	0.00275741
1000	1	0	0	0	0	0	0	0	17	0.6	0.7	0	0.302329	0.00268746
1000	1	0	0	0	0	0	0	0	18	0.6	0.7	0	0.319675	0.00262065
1000	1	0	0	0	0	0	0	0	19	0.6	0.7	0	0.336227	0.00255689
1000	1	0	0	0	0	0	0	0	20	0.6	0.7	0	0.352013	0.00249608
1000	1	0	0	0	0	0	0	0	21	0.6	0.7	0	0.367063	0.0024381
1000	1	0	0	0	0	0	0	0	22	0.6	0.7	0	0.381414	0.00238282
1000	1	0	0	0	0	0	0	0	23	0.6	0.7	0	0.395098	0.00233011
1000	1	0	0	0	0	0	0	0	24	0.6	0.7	0	0.408152	0.00227982
1000	1	0	0	0	0	0	0	0	25	0.6	0.7	0	0.420611	0.00223183
1000	1	0	0	0	0	0	0	0	26	0.6	0.7	0	0.432509	0.002186
1000	1	0	0	0	0	0	0	0	27	0.6	0.7	0	0.443877	0.00214221
1000	1	0	0	0	0	0	0	0	28	0.6	0.7	0	0.454747	0.00210034
1000	1	0	0	0	0	0	0	0	29	0.6	0.7	0	0.465147	0.00206028
1000	1	0	0	0	0	0	0	0	30	0.6	0.7	0	0.475105	0.00202191
1000	1	0	0	0	0	0	0	0	0	0.6	0.8	0	0	0.002738
1000	1	0	0	0	0	0	0	0	1	0.6	0.8	0	0.00135205	0.0027343
1000	1	0	0	0	0	0	0	0	2	0.6	0.8	0	0.00565264	0.00272252
1000	1	0	0	0	0	0	0	0	3	0.6	0.8	0	0.0127027	0.00270322
1000	1	0	0	0	0	0	0	0	4	0.6	0.8	0	0.0222	0.00267722
1000	1	0	0	0	0	0	0	0	5	0.6	0.8	0	0.0337757	0.00264552
1000	1	0	0	0	0	0	0	0	6	0.6	0.8	0	0.0470334	0.00260922
1000	1	0	0	0	0	0	0	0	7	0.6	0.8	0	0.0615818	0.00256939
1000	1	0	0	0	0	0	0	0	8	0.6	0.8	0	0.0770591	0.00252701
1000	1	0	0	0	0	0	0	0	9	0.6	0.8	0	0.0931467	0.00248296
1000	1	0	0	0	0	0	0	0	10	0.6	0.8	0	0.109576	0.00243798
1000	1	0	0	0	0	0	0	0	11	0.6	0.8	0	0.126127	0.00239266
1000	1	0	0	0	0	0	0	0	12	0.6	0.8	0	0.142627	0.00234748
1000	1	0	0	0	0	0	0	0	13	0.6	0.8	0	0.158941	0.00230281
1000	1	0	0	0	0	0	0	0	14	0.6	0.8	0	0.174971	0.00225892
1000	1	0	0	0	0	0	0	0	15	0.6	0.8	0	0.190644	0.00221601
1000	1	0	0	0	0	0	0	0	16	0.6	0.8	0	0.20591	0.00217421
1000	1	0	0	0	0	0	0	0	17	0.6	0.8	0	0.220736	0.00213362
1000	1	0	0	0	0	0	0	0	18	0.6	0.8	0	0.235104	0.00209428
1000	1	0	0	0	0	0	0	0	19	0.6	0.8	0	0.249006	0.00205622
1000	1	0	0	0	0	0	0	0	20	0.6	0.8	0	0.262439	0.00201943
1000	1	0	0	0	0	0	0	0	21	0.6	0.8	0	0.27541	0.00198392
1000	1	0	0	0	0	0	0	0	22	0.6	0.8	0	0.287926	0.00194965
1000	1	0	0	0	0	0	0	0	23	0.6	0.8	0	0.300001	0.00191659
1000	1	0	0	0	0	0	0	0	24	0.6	0.8	0	0.311646	0.00188471
1000	1	0	0	0	0	0	0	0	25	0.6	0.8	0	0.322878	0.00185395
1000	1	0	0	0	0	0	0	0	26	0.6	0.8	0	0.333712	0.00182429
1000	1	0	0	0	0	0	0	0	27	0.6	0.8	0	0.344164	0.00179567
1000	1	0	0	0	0	0	0	0	28	0.6	0.8	0	0.354251	0.00176805
1000	1	0	0	0	0	0	0	0	29	0.6	0.8	0	0.363987	0.0017414
1000	1	0	0	0	0	0	0	0	30	0.6	0.8	0	0.373389	0.00171565
1000	1	0	0	0	0	0	0	0	0	0.6	0.9	0	0	0.00204955
1000	1	0	0	0	0	0	0	0	1	0.6	0.9	0	0.000580118	0.00204837
1000	1	0	0	0	0	0	0	0	2	0.6	0.9	0	0.00259786	0.00204423
1000	1	0	0	0	0	0	0	0	3	0.6	0.9	0	0.00597286	0.00203731
1000	1	0	0	0	0	0	0	0	4	0.6	0.9	0	0.0105821	0.00202787
1000	1	0	0	0	0	0	0	0	5	0.6	0.9	0	0.0162736	0.0020162
1000	1	0	0	0	0	0	0	0	6	0.6	0.9	0	0.0246819	0.00199897
1000	1	0	0	0	0	0	0	0	7	0.6	0.9	0	0.0344852	0.00197887
1000	1	0	0	0	0	0	0	0	8	0.6	0.9	0	0.04507	0.00195718
1000	1	0	0	0	0	0	0	0	9	0.6	0.9	0	0.0562424	0.00193428
1000	1	0	0	0	0	0	0	0	10	0.6	0.9	0	0.0678319	0.00191053
1000	1	0	0	0	0	0	0	0	11	0.6	0.9	0	0.0796925	0.00188622
1000	1	0	0	0	0	0	0	0	12	0.6	0.9	0	0.0917026	0.0018616
1000	1	0	0	0	0	0	0	0	13	0.6	0.9	0	0.103762	0.00183689
1000	1	0	0	0	0	0	0	0	14	0.6	0.9	0	0.115792	0.00181223
1000	1	0	0	0	0	0	0	0	15	0.6	0.9	0	0.127728	0.00178777
1000	1	0	0	0	0	0	0	0	16	0.6	0.9	0	0.139521	0.0017636
1000	1	0	0	0	0	0	0	0	17	0.6	0.9	0	0.151134	0.0017398
1000	1	0	0	0	0	0	0	0	18	0.6	0.9	0	0.162538	0.00171642
1000	1	0	0	0	0	0	0	0	19	0.6	0.9	0	0.173715	0.00169351
1000	1	0	0	0	0	0	0	0	20	0.6	0.9	0	0.184649	0.0016711
1000	1	0	0	0	0	0	0	0	21	0.6	0.9	0	0.195332	0.00164921
1000	1	0	0	0	0	0	0	0	22	0.6	0.9	0	0.205759	0.00162784
1000	1	0	0	0	0	0	0	0	23	0.6	0.9	0	0.215928	0.001607
1000	1	0	0	0	0	0	0	0	24	0.6	0.9	0	0.225839	0.00158668
1000	1	0	0	0	0	0	0	0	25	0.6	0.9	0	0.235494	0.00156689
1000	1	0	0	0	0	0	0	0	26	0.6	0.9	0	0.244898	0.00154762
1000	1	0	0	0	0	0	0	0	27	0.6	0.9	0	0.254055	0.00152885
1000	1	0	0	0	0	0	0	0	28	0.6	0.9	0	0.26297	0.00151058
1000	1	0	0	0	0	0	0	0	29	0.6	0.9	0	0.27165	0.00149279
1000	1	0	0	0	0	0	0	0	30	0.6	0.9	0	0.280101	0.00147547
1000	1	0	0	0	0	0	0	0	0	0.8	0.3	0	0	0.000771391
1000	1	0	0	0	0	0	0	0	1	0.8	0.3	0	1.66476e-05	0.000771378
1000	1	0	0	0	0	0	0	0	2	0.8	0.3	0	7.27598e-05	0.000771335
1000	1	0	0	0	0	0	0	0	3	0.8	0.3	0	0.000168236	0.000771261
1000	1	0	0	0	0	0	0	0	4	0.8	0.3	0	0.000302964	0.000771157
1000	1	0	0	0	0	0	0	0	5	0.8	0.3	0	0.000476818	0.000771023
1000	1	0	0	0	0	0	0	0	6	0.8	0.3	0	0.00068966	0.000770859
1000	1	0	0	0	0	0	0	0	7	0.8	0.3	0	0.000941339	0.000770665
1000	1	0	0	0	0	0	0	0	8	0.8	0.3	0	0.00123169	0.000770441
1000	1	0	0	0	0	0	0	0	9	0.8	0.3	0	0.00156054	0.000770187
1000	1	0	0	0	0	0	0	0	10	0.8	0.3	0	0.00192771	0.000769904
1000	1	0	0	0	0	0	0	0	11	0.8	0.3	0	0.00233298	0.000769591
1000	1	0	0	0	0	0	0	0	12	0.8	0.3	0	0.00277615	0.00076925
1000	1	0	0	0	0	0	0	0	13	0.8	0.3	0	0.003257	0.000768879
1000	1	0	0	0	0	0	0	0	14	0.8	0.3	0	0.00377529	0.000768479
1000	1	0	0	0	0	0	0	0	15	0.8	0.3	0	0.00433076	0.00076805
1000	1	0	0	0	0	0	0	0	16	0.8	0.3	0	0.00492317	0.000767593
1000	1	0	0	0	0	0	0	0	17	0.8	0.3	0	0.00555224	0.000767108
1000	1	0	0	0	0	0	0	0	18	0.8	0.3	0	0.0062177	0.000766595
1000	1	0	0	0	0	0	0	0	19	0.8	0.3	0	0.00691924	0.000766054
1000	1	0	0	0	0	0	0	0	20	0.8	0.3	0	0.00765656	0.000765485
1000	1	0	0	0	0	0	0	0	21	0.8	0.3	0	0.00842936	0.000764889
1000	1	0	0	0	0	0	0	0	22	0.8	0.3	0	0.00923731	0.000764265
1000	1	0	0	0	0	0	0	0	23	0.8	0.3	0	0.0100801	0.000763615
1000	1	0	0	0	0	0	0	0	24	0.8	0.3	0	0.0109573	0.000762939
1000	1	0	0	0	0	0	0	0	25	0.8	0.3	0	0.0118687	0.000762236
1000	1	0	0	0	0	0	0	0	26	0.8	0.3	0	0.0128138	0.000761507
1000	1	0	0	0	0	0	0	0	27	0.8	0.3	0	0.0137923	0.000760752
1000	1	0	0	0	0	0	0	0	28	0.8	0.3	0	0.0148038	0.000759971
1000	1	0	0	0	0	0	0	0	29	0.8	0.3	0	0.015848	0.000759166
1000	1	0	0	0	0	0	0	0	30	0.8	0.3	0	0.0169244	0.000758336
1000	1	0	0	0	0	0	0	0	0	0.8	0.4	0	0	0.00123476
1000	1	0	0	0	0	0	0	0	1	0.8	0.4	0	4.94622e-05	0.0012347
1000	1	0	0	0	0	0	0	0	2	0.8	0.4	0	0.000208791	0.0012345
1000	1	0	0	0	0	0	0	0	3	0.8	0.4	0	0.000477669	0.00123417
1000	1	0	0	0	0	0	0	0	4	0.8	0.4	0	0.000855663	0.0012337
1000	1	0	0	0	0	0	0	0	5	0.8	0.4	0	0.00134222	0.0012331
1000	1	0	0	0	0	0	0	0	6	0.8	0.4	0	0.00193669	0.00123237
1000	1	0	0	0	0	0	0	0	7	0.8	0.4	0	0.00263828	0.0012315
1000	1	0	0	0	0	0	0	0	8	0.8	0.4	0	0.00344611	0.0012305
1000	1	0	0	0	0	0	0	0	9	0.8	0.4	0	0.00435919	0.00122937
1000	1	0	0	0	0	0	0	0	10	0.8	0.4	0	0.00537643	0.00122812
1000	1	0	0	0	0	0	0	0	11	0.8	0.4	0	0.00649662	0.00122674
1000	1	0	0	0	0	0	0	0	12	0.8	0.4	0	0.00771847	0.00122523
1000	1	0	0	0	0	0	0	0	13	0.8	0.4	0	0.00904058	0.00122359
1000	1	0	0	0	0	0	0	0	14	0.8	0.4	0	0.0104615	0.00122184
1000	1	0	0	0	0	0	0	0	15	0.8	0.4	0	0.0119796	0.00121997
1000	1	0	0	0	0	0	0	0	16	0.8	0.4	0	0.0135933	0.00121797
1000	1	0	0	0	0	0	0	0	17	0.8	0.4	0	0.0153008	0.00121586
1000	1	0	0	0	0	0	0	0	18	0.8	0.4	0	0.0171004	0.00121364
1000	1	0	0	0	0	0	0	0	19	0.8	0.4	0	0.0189901	0.00121131
1000	1	0	0	0	0	0	0	0	20	0.8	0.4	0	0.0209681	0.00120887
1000	1	0	0	0	0	0	0	0	21	0.8	0.4	0	0.0230323	0.00120632
1000	1	0	0	0	0	0	0	0	22	0.8	0.4	0	0.0251807	0.00120366
1000	1	0	0	0	0	0	0	0	23	0.8	0.4	0	0.0274112	0.00120091
1000	1	0	0	0	0	0	0	0	24	0.8	0.4	0	0.0297217	0.00119806
1000	1	0	0	0	0	0	0	0	25	0.8	0.4	0	0.0321099	0.00119511
1000	1	0	0	0	0	0	0	0	26	0.8	0.4	0	0.0345738	0.00119207
1000	1	0	0	0	0	0	0	0	27	0.8	0.4	0	0.0371109	0.00118893
1000	1	0	0	0	0	0	0	0	28	0.8	0.4	0	0.0397192	0.00118571
1000	1	0	0	0	0	0	0	0	29	0.8	0.4	0	0.0423962	0.00118241
1000	1	0	0	0	0	0	0	0	30	0.8	0.4	0	0.0451397	0.00117902
1000	1	0	0	0	0	0	0	0	0	0.8	0.5	0	0	0.00192774
1000	1	0	0	0	0	0	0	0	1	0.8	0.5	0	0.000155661	0.00192744
1000	1	0	0	0	0	0	0	0	2	0.8	0.5	0	0.000646132	0.00192649
1000	1	0	0	0	0	0	0	0	3	0.8	0.5	0	0.0014694	0.00192491
1000	1	0	0	0	0	0	0	0	4	0.8	0.5	0	0.00262232	0.00192268
1000	1	0	0	0	0	0	0	0	5	0.8	0.5	0	0.00410065	0.00191983
1000	1	0	0	0	0	0	0	0	6	0.8	0.5	0	0.00589909	0.00191637
1000	1	0	0	0	0	0	0	0	7	0.8	0.5	0	0.00801133	0.00191229
1000	1	0	0	0	0	0	0	0	8	0.8	0.5	0	0.0104301	0.00190763
1000	1	0	0	0	0	0	0	0	9	0.8	0.5	0	0.0131472	0.00190239
1000	1	0	0	0	0	0	0	0	10	0.8	0.5	0	0.0161538	0.0018966
1000	1	0	0	0	0	0	0	0	11	0.8	0.5	0	0.01944	0.00189026
1000	1	0	0	0	0	0	0	0	12	0.8	0.5	0	0.0229956	0.00188341
1000	1	0	0	0	0	0	0	0	13	0.8	0.5	0	0.0268096	0.00187606
1000	1	0	0	0	0	0	0	0	14	0.8	0.5	0	0.0308706	0.00186823
1000	1	0	0	0	0	0	0	0	15	0.8	0.5	0	0.0351668	0.00185995
1000	1	0	0	0	0	0	0	0	16	0.8	0.5	0	0.0396861	0.00185123
1000	1	0	0	0	0	0	0	0	17	0.8	0.5	0	0.0444161	0.00184212
1000	1	0	0	0	0	0	0	0	18	0.8	0.5	0	0.0493442	0.00183261
1000	1	0	0	0	0	0	0	0	19	0.8	0.5	0	0.054458	0.00182276
1000	1	0	0	0	0	0	0	0	20	0.8	0.5	0	0.0597447	0.00181257
1000	1	0	0	0	0	0	0	0	21	0.8	0.5	0	0.0651919	0.00180206
1000	1	0	0	0	0	0	0	0	22	0.8	0.5	0	0.0707872	0.00179128
1000	1	0	0	0	0	0	0	0	23	0.8	0.5	0	0.0765183	0.00178023
1000	1	0	0	0	0	0	0	0	24	0.8	0.5	0	0.0823732	0.00176894
1000	1	0	0	0	0	0	0	0	25	0.8	0.5	0	0.0883403	0.00175744
1000	1	0	0	0	0	0	0	0	26	0.8	0.5	0	0.094408	0.00174574
1000	1	0	0	0	0	0	0	0	27	0.8	0.5	0	0.100565	0.00173387
1000	1	0	0	0	0	0	0	0	28	0.8	0.5	0	0.106802	0.00172185
1000	1	0	0	0	0	0	0	0	29	0.8	0.5	0	0.113107	0.0017097
1000	1	0	0	0	0	0	0	0	30	0.8	0.5	0	0.119471	0.00169743
1000	1	0	0	0	0	0	0	0	0	0.8	0.6	0	0	0.00289515
1000	1	0	0	0	0	0	0	0	1	0.8	0.6	0	0.000526756	0.00289363
1000	1	0	0	0	0	0	0	0	2	0.8	0.6	0	0.00216674	0.00288888
1000	1	0	0	0	0	0	0	0	3	0.8	0.6	0	0.00489932	0.00288097
1000	1	0	0	0	0	0	0	0	4	0.8	0.6	0	0.00869125	0.00286999
1000	1	0	0	0	0	0	0	0	5	0.8	0.6	0	0.0134978	0.00285608
1000	1	0	0	0	0	0	0	0	6	0.8	0.6	0	0.0192641	0.00283938
1000	1	0	0	0	0	0	0	0	7	0.8	0.6	0	0.025927	0.00282009
1000	1	0	0	0	0	0	0	0	8	0.8	0.6	0	0.0334168	0.00279841
1000	1	0	0	0	0	0	0	0	9	0.8	0.6	0	0.041659	0.00277454
1000	1	0	0	0	0	0	0	0	10	0.8	0.6	0	0.0505765	0.00274873
1000	1	0	0	0	0	0	0	0	11	0.8	0.6	0	0.0600907	0.00272118
1000	1	0	0	0	0	0	0	0	12	0.8	0.6	0	0.0701239	0.00269213
1000	1	0	0	0	0	0	0	0	13	0.8	0.6	0	0.0805999	0.0026618
1000	1	0	0	0	0	0	0	0	14	0.8	0.6	0	0.0914454	0.0026304
1000	1	0	0	0	0	0	0	0	15	0.8	0.6	0	0.102591	0.00259813
1000	1	0	0	0	0	0	0	0	16	0.8	0.6	0	0.113972	0.00256518
1000	1	0	0	0	0	0	0	0	17	0.8	0.6	0	0.125527	0.00253173
1000	1	0	0	0	0	0	0	0	18	0.8	0.6	0	0.137202	0.00249793
1000	1	0	0	0	0	0	0	0	19	0.8	0.6	0	0.148947	0.00246393
1000	1	0	0	0	0	0	0	0	20	0.8	0.6	0	0.160716	0.00242985
1000	1	0	0	0	0	0	0	0	21	0.8	0.6	0	0.172471	0.00239582
1000	1	0	0	0	0	0	0	0	22	0.8	0.6	0	0.184175	0.00236193
1000	1	0	0	0	0	0	0	0	23	0.8	0.6	0	0.1958	0.00232828
1000	1	0	0	0	0	0	0	0	24	0.8	0.6	0	0.207317	0.00229493
1000	1	0	0	0	0	0	0	0	25	0.8	0.6	0	0.218705	0.00226196
1000	1	0	0	0	0	0	0	0	26	0.8	0.6	0	0.229945	0.00222942
1000	1	0	0	0	0	0	0	0	27	0.8	0.6	0	0.241021	0.00219735
1000	1	0	0	0	0	0	0	0	28	0.8	0.6	0	0.25192	0.0021658
1000	1	0	0	0	0	0	0	0	29	0.8	0.6	0	0.262632	0.00213479
1000	1	0	0	0	0	0	0	0	30	0.8	0.6	0	0.273149	0.00210434
1000	1	0	0	0	0	0	0	0	0	0.8	0.7	0	0	0.00340465
1000	1	0	0	0	0	0	0	0	1	0.8	0.7	0	0.00116374	0.00340069
1000	1	0	0	0	0	0	0	0	2	0.8	0.7	0	0.00479598	0.00338832
1000	1	0	0	0	0	0	0	0	3	0.8	0.7	0	0.0107892	0.00336792
1000	1	0	0	0	0	0	0	0	4	0.8	0.7	0	0.018974	0.00334005
1000	1	0	0	0	0	0	0	0	5	0.8	0.7	0	0.0291324	0.00330546
1000	1	0	0	0	0	0	0	0	6	0.8	0.7	0	0.0410135	0.00326501
1000	1	0	0	0	0	0	0	0	7	0.8	0.7	0	0.0543491	0.00321961
1000	1	0	0	0	0	0	0	0	8	0.8	0.7	0	0.0688683	0.00317017
1000	1	0	0	0	0	0	0	0	9	0.8	0.7	0	0.0843096	0.0031176
1000	1	0	0	0	0	0	0	0	10	0.8	0.7	0	0.10043	0.00306272
1000	1	0	0	0	0	0	0	0	11	0.8	0.7	0	0.117009	0.00300627
1000	1	0	0	0	0	0	0	0	12	0.8	0.7	0	0.133856	0.00294891
1000	1	0	0	0	0	0	0	0	13	0.8	0.7	0	0.150806	0.0028912
1000	1	0	0	0	0	0	0	0	14	0.8	0.7	0	0.167721	0.00283361
1000	1	0	0	0	0	0	0	0	15	0.8	0.7	0	0.184489	0.00277652
1000	1	0	0	0	0	0	0	0	16	0.8	0.7	0	0.201021	0.00272023
1000	1	0	0	0	0	0	0	0	17	0.8	0.7	0	0.217247	0.00266499
1000	1	0	0	0	0	0	0	0	18	0.8	0.7	0	0.233114	0.00261097
1000	1	0	0	0	0	0	0	0	19	0.8	0.7	0	0.248583	0.0025583
1000	1	0	0	0	0	0	0	0	20	0.8	0.7	0	0.263629	0.00250707
1000	1	0	0	0	0	0	0	0	21	0.8	0.7	0	0.278234	0.00245735
1000	1	0	0	0	0	0	0	0	22	0.8	0.7	0	0.292389	0.00240916
1000	1	0	0	0	0	0	0	0	23	0.8	0.7	0	0.306091	0.0023625
1000	1	0	0	0	0	0	0	0	24	0.8	0.7	0	0.319343	0.00231739
1000	1	0	0	0	0	0	0	0	25	0.8	0.7	0	0.332149	0.00227379
1000	1	0	0	0	0	0	0	0	26	0.8	0.7	0	0.344519	0.00223167
1000	1	0	0	0	0	0	0	0	27	0.8	0.7	0	0.356463	0.002191
1000	1	0	0	0	0	0	0	0	28	0.8	0.7	0	0.367994	0.00215175
1000	1	0	0	0	0	0	0	0	29	0.8	0.7	0	0.379124	0.00211385
1000	1	0	0	0	0	0	0	0	30	0.8	0.7	0	0.389868	0.00207727
1000	1	0	0	0	0	0	0	0	0	0.8	0.8	0	0	0.00273931
1000	1	0	0	0	0	0	0	0	1	0.8	0.8	0	0.000954466	0.00273669
1000	1	0	0	0	0	0	0	0	2	0.8	0.8	0	0.0040515	0.00272821
1000	1	0	0	0	0	0	0	0	3	0.8	0.8	0	0.0091972	0.00271411
1000	1	0	0	0	0	0	0	0	4	0.8	0.8	0	0.0162437	0.00269481
1000	1	0	0	0	0	0	0	0	5	0.8	0.8	0	0.0250012	0.00267082
1000	1	0	0	0	0	0	0	0	6	0.8	0.8	0	0.0352521	0.00264274
1000	1	0	0	0	0	0	0	0	7	0.8	0.8	0	0.0467651	0.0026112
1000	1	0	0	0	0	0	0	0	8	0.8	0.8	0	0.0593078	0.00257684
1000	1	0	0	0	0	0	0	0	9	0.8	0.8	0	0.0726571	0.00254027
1000	1	0	0	0	0	0	0	0	10	0.8	0.8	0	0.0866066	0.00250206
1000	1	0	0	0	0	0	0	0	11	0.8	0.8	0	0.100971	0.00246271
1000	1	0	0	0	0	0	0	0	12	0.8	0.8	0	0.115589	0.00242267
1000	1	0	0	0	0	0	0	0	13	0.8	0.8	0	0.130321	0.00238231
1000	1	0	0	0	0	0	0	0	14	0.8	0.8	0	0.145054	0.00234195
1000	1	0	0	0	0	0	0	0	15	0.8	0.8	0	0.159693	0.00230185
1000	1	0	0	0	0	0	0	0	16	0.8	0.8	0	0.174162	0.00226222
1000	1	0	0	0	0	0	0	0	17	0.8	0.8	0	0.188402	0.00222321
1000	1	0	0	0	0	0	0	0	18	0.8	0.8	0	0.202368	0.00218495
1000	1	0	0	0	0	0	0	0	19	0.8	0.8	0	0.216027	0.00214754
1000	1	0	0	0	0	0	0	0	20	0.8	0.8	0	0.229355	0.00211103
1000	1	0	0	0	0	0	0	0	21	0.8	0.8	0	0.242336	0.00207547
1000	1	0	0	0	0	0	0	0	22	0.8	0.8	0	0.25496	0.00204089
1000	1	0	0	0	0	0	0	0	23	0.8	0.8	0	0.267223	0.00200729
1000	1	0	0	0	0	0	0	0	24	0.8	0.8	0	0.279126	0.00197469
1000	1	0	0	0	0	0	0	0	25	0.8	0.8	0	0.29067	0.00194307
1000	1	0	0	0	0	0	0	0	26	0.8	0.8	0	0.301861	0.00191241
1000	1	0	0	0	0	0	0	0	27	0.8	0.8	0	0.312706	0.0018827
1000	1	0	0	0	0	0	0	0	28	0.8	0.8	0	0.323213	0.00185392
1000	1	0	0	0	0	0	0	0	29	0.8	0.8	0	0.333393	0.00182603
1000	1	0	0	0	0	0	0	0	30	0.8	0.8	0	0.343254	0.00179902
1000	1	0	0	0	0	0	0	0	0	0.8	0.9	0	0	0.00209951
1000	1	0	0	0	0	0	0	0	1	0.8	0.9	0	0.000595396	0.00209826
1000	1	0	0	0	0	0	0	0	2	0.8	0.9	0	0.00264265	0.00209396
1000	1	0	0	0	0	0	0	0	3	0.8	0.9	0	0.00608953	0.00208673
1000	1	0	0	0	0	0	0	0	4	0.8	0.9	0	0.010853	0.00207673
1000	1	0	0	0	0	0	0	0	5	0.8	0.9	0	0.0168254	0.00206419
1000	1	0	0	0	0	0	0	0	6	0.8	0.9	0	0.0238812	0.00204937
1000	1	0	0	0	0	0	0	0	7	0.8	0.9	0	0.0318846	0.00203257
1000	1	0	0	0	0	0	0	0	8	0.8	0.9	0	0.0406965	0.00201407
1000	1	0	0	0	0	0	0	0	9	0.8	0.9	0	0.0501798	0.00199416
1000	1	0	0	0	0	0	0	0	10	0.8	0.9	0	0.0602045	0.00197311
1000	1	0	0	0	0	0	0	0	11	0.8	0.9	0	0.0706502	0.00195118
1000	1	0	0	0	0	0	0	0	12	0.8	0.9	0	0.0814081	0.00192859
1000	1	0	0	0	0	0	0	0	13	0.8	0.9	0	0.0923823	0.00190555
1000	1	0	0	0	0	0	0	0	14	0.8	0.9	0	0.103489	0.00188223
1000	1	0	0	0	0	0	0	0	15	0.8	0.9	0	0.114657	0.00185879
1000	1	0	0	0	0	0	0	0	16	0.8	0.9	0	0.125826	0.00183534
1000	1	0	0	0	0	0	0	0	17	0.8	0.9	0	0.136945	0.00181199
1000	1	0	0	0	0	0	0	0	18	0.8	0.9	0	0.147974	0.00178884
1000	1	0	0	0	0	0	0	0	19	0.8	0.9	0	0.158879	0.00176594
1000	1	0	0	0	0	0	0	0	20	0.8	0.9	0	0.169633	0.00174336
1000	1	0	0	0	0	0	0	0	21	0.8	0.9	0	0.180217	0.00172114
1000	1	0	0	0	0	0	0	0	22	0.8	0.9	0	0.190613	0.00169932
1000	1	0	0	0	0	0	0	0	23	0.8	0.9	0	0.200811	0.0016779
1000	1	0	0	0	0	0	0	0	24	0.8	0.9	0	0.210802	0.00165693
1000	1	0	0	0	0	0	0	0	25	0.8	0.9	0	0.22058	0.0016364
1000	1	0	0	0	0	0	0	0	26	0.8	0.9	0	0.230143	0.00161632
1000	1	0	0	0	0	0	0	0	27	0.8	0.9	0	0.239488	0.0015967
1000	1	0	0	0	0	0	0	0	28	0.8	0.9	0	0.248617	0.00157753
1000	1	0	0	0	0	0	0	0	29	0.8	0.9	0	0.257531	0.00155882
1000	1	0	0	0	0	0	0	0	30	0.8	0.9	0	0.266232	0.00154055
1000	1	0	0	0	0	0	0	0	0	0.2	0.3	0.2	0	0.000888437
1000	1	0	0	0	0	0	0	0	1	0.2	0.3	0.2	7.67001e-05	0.000888369
1000	1	0	0	0	0	0	0	0	2	0.2	0.3	0.2	0.000312764	0.000888159
1000	1	0	0	0	0	0	0	0	3	0.2	0.3	0.2	0.000707511	0.000887808
1000	1	0	0	0	0	0	0	0	4	0.2	0.3	0.2	0.00126002	0.000887317
1000	1	0	0	0	0	0	0	0	5	0.2	0.3	0.2	0.00196915	0.000886687
1000	1	0	0	0	0	0	0	0	6	0.2	0.3	0.2	0.00283351	0.000885919
1000	1	0	0	0	0	0	0	0	7	0.2	0.3	0.2	0.00385151	0.000885015
1000	1	0	0	0	0	0	0	0	8	0.2	0.3	0.2	0.00502133	0.000883976
1000	1	0	0	0	0	0	0	0	9	0.2	0.3	0.2	0.00634094	0.000882803
1000	1	0	0	0	0	0	0	0	10	0.2	0.3	0.2	0.00780813	0.0008815
1000	1	0	0	0	0	0	0	0	11	0.2	0.3	0.2	0.00942047	0.000880067
1000	1	0	0	0	0	0	0	0	12	0.2	0.3	0.2	0.0111754	0.000878508
1000	1	0	0	0	0	0	0	0	13	0.2	0.3	0.2	0.01307	0.000876825
1000	1	0	0	0	0	0	0	0	14	0.2	0.3	0.2	0.0151015	0.00087502
1000	1	0	0	0	0	0	0	0	15	0.2	0.3	0.2	0.0172668	0.000873096
1000	1	0	0	0	0	0	0	0	16	0.2	0.3	0.2	0.0195626	0.000871057
1000	1	0	0	0	0	0	0	0	17	0.2	0.3	0.2	0.0219855	0.000868904
1000	1	0	0	0	0	0	0	0	18	0.2	0.3	0.2	0.0245321	0.000866641
1000	1	0	0	0	0	0	0	0	19	0.2	0.3	0.2	0.0271989	0.000864272
1000	1	0	0	0	0	0	0	0	20	0.2	0.3	0.2	0.029982	0.0008618
1000	1	0	0	0	0	0	0	0	21	0.2	0.3	0.2	0.0328779	0.000859227
1000	1	0	0	0	0	0	0	0	22	0.2	0.3	0.2	0.0358826	0.000856557
1000	1	0	0	0	0	0	0	0	23	0.2	0.3	0.2	0.0389922	0.000853795
1000	1	0	0	0	0	0	0	0	24	0.2	0.3	0.2	0.0422029	0.000850942
1000	1	0	0	0	0	0	0	0	25	0.2	0.3	0.2	0.0455106	0.000848003
1000	1	0	0	0	0	0	0	0	26	0.2	0.3	0.2	0.0489115	0.000844982
1000	1	0	0	0	0	0	0	0	27	0.2	0.3	0.2	0.0524014	0.000841881
1000	1	0	0	0	0	0	0	0	28	0.2	0.3	0.2	0.0559763	0.000838705
1000	1	0	0	0	0	0	0	0	29	0.2	0.3	0.2	0.0596323	0.000835457
1000	1	0	0	0	0	0	0	0	30	0.2	0.3	0.2	0.0633654	0.000832141
1000	1	0	0	0	0	0	0	0	0	0.2	0.4	0.2	0	0.00146064
1000	1	0	0	0	0	0	0	0	1	0.2	0.4	0.2	0.000231777	0.0014603
1000	1	0	0	0	0	0	0	0	2	0.2	0.4	0.2	0.00093759	0.00145927
1000	1	0	0	0	0	0	0	0	3	0.2	0.4	0.2	0.0021135	0.00145756
1000	1	0	0	0	0	0	0	0	4	0.2	0.4	0.2	0.00375339	0.00145516
1000	1	0	0	0	0	0	0	0	5	0.2	0.4	0.2	0.00584907	0.0014521
1000	1	0	0	0	0	0	0	0	6	0.2	0.4	0.2	0.00839033	0.00144839
1000	1	0	0	0	0	0	0	0	7	0.2	0.4	0.2	0.0113651	0.00144404
1000	1	0	0	0	0	0	0	0	8	0.2	0.4	0.2	0.0147597	0.00143908
1000	1	0	0	0	0	0	0	0	9	0.2	0.4	0.2	0.0185588	0.00143354
1000	1	0	0	0	0	0	0	0	10	0.2	0.4	0.2	0.0227457	0.00142742
1000	1	0	0	0	0	0	0	0	11	0.2	0.4	0.2	0.0273026	0.00142076
1000	1	0	0	0	0	0	0	0	12	0.2	0.4	0.2	0.0322106	0.00141359
1000	1	0	0	0	0	0	0	0	13	0.2	0.4	0.2	0.03745	0.00140594
1000	1	0	0	0	0	0	0	0	14	0.2	0.4	0.2	0.0430007	0.00139783
1000	1	0	0	0	0	0	0	0	15	0.2	0.4	0.2	0.048842	0.0013893
1000	1	0	0	0	0	0	0	0	16	0.2	0.4	0.2	0.0549529	0.00138038
1000	1	0	0	0	0	0	0	0	17	0.2	0.4	0.2	0.0613125	0.00137109
1000	1	0	0	0	0	0	0	0	18	0.2	0.4	0.2	0.0679	0.00136146
1000	1	0	0	0	0	0	0	0	19	0.2	0.4	0.2	0.0746945	0.00135154
1000	1	0	0	0	0	0	0	0	20	0.2	0.4	0.2	0.0816759	0.00134134
1000	1	0	0	0	0	0	0	0	21	0.2	0.4	0.2	0.0888244	0.0013309
1000	1	0	0	0	0	0	0	0	22	0.2	0.4	0.2	0.0961205	0.00132024
1000	1	0	0	0	0	0	0	0	23	0.2	0.4	0.2	0.103546	0.0013094
1000	1	0	0	0	0	0	0	0	24	0.2	0.4	0.2	0.111082	0.00129839
1000	1	0	0	0	0	0	0	0	25	0.2	0.4	0.2	0.118713	0.00128725
1000	1	0	0	0	0	0	0	0	26	0.2	0.4	0.2	0.126421	0.00127599
1000	1	0	0	0	0	0	0	0	27	0.2	0.4	0.2	0.134192	0.00126464
1000	1	0	0	0	0	0	0	0	28	0.2	0.4	0.2	0.142011	0.00125322
1000	1	0	0	0	0	0	0	0	29	0.2	0.4	0.2	0.149863	0.00124175
1000	1	0	0	0	0	0	0	0	30	0.2	0.4	0.2	0.157737	0.00123024
1000	1	0	0	0	0	0	0	0	0	0.2	0.5	0.2	0	0.00244957
1000	1	0	0	0	0	0	0	0	1	0.2	0.5	0.2	0.000882119	0.00244741
1000	1	0	0	0	0	0	0	0	2	0.2	0.5	0.2	0.00354388	0.00244089
1000	1	0	0	0	0	0	0	0	3	0.2	0.5	0.2	0.00793535	0.00243014
1000	1	0	0	0	0	0	0	0	4	0.2	0.5	0.2	0.0139771	0.00241534
1000	1	0	0	0	0	0	0	0	5	0.2	0.5	0.2	0.021564	0.00239675
1000	1	0	0	0	0	0	0	0	6	0.2	0.5	0.2	0.0305702	0.00237469
1000	1	0	0	0	0	0	0	0	7	0.2	0.5	0.2	0.0408544	0.0023495
1000	1	0	0	0	0	0	0	0	8	0.2	0.5	0.2	0.0522656	0.00232154
1000	1	0	0	0	0	0	0	0	9	0.2	0.5	0.2	0.0646484	0.00229121
1000	1	0	0	0	0	0	0	0	10	0.2	0.5	0.2	0.0778476	0.00225888
1000	1	0	0	0	0	0	0	0	11	0.2	0.5	0.2	0.0917126	0.00222492
1000	1	0	0	0	0	0	0	0	12	0.2	0.5	0.2	0.1061	0.00218967
1000	1	0	0	0	0	0	0	0	13	0.2	0.5	0.2	0.120878	0.00215347
1000	1	0	0	0	0	0	0	0	14	0.2	0.5	0.2	0.135924	0.00211661
1000	1	0	0	0	0	0	0	0	15	0.2	0.5	0.2	0.151131	0.00207937
1000	1	0	0	0	0	0	0	0	16	0.2	0.5	0.2	0.166401	0.00204196
1000	1	0	0	0	0	0	0	0	17	0.2	0.5	0.2	0.181652	0.0020046
1000	1	0	0	0	0	0	0	0	18	0.2	0.5	0.2	0.196812	0.00196747
1000	1	0	0	0	0	0	0	0	19	0.2	0.5	0.2	0.211821	0.0019307
1000	1	0	0	0	0	0	0	0	20	0.2	0.5	0.2	0.226629	0.00189443
1000	1	0	0	0	0	0	0	0	21	0.2	0.5	0.2	0.241195	0.00185875
1000	1	0	0	0	0	0	0	0	22	0.2	0.5	0.2	0.255486	0.00182374
1000	1	0	0	0	0	0	0	0	23	0.2	0.5	0.2	0.269479	0.00178946
1000	1	0	0	0	0	0	0	0	24	0.2	0.5	0.2	0.283153	0.00175597
1000	1	0	0	0	0	0	0	0	25	0.2	0.5	0.2	0.296494	0.00172328
1000	1	0	0	0	0	0	0	0	26	0.2	0.5	0.2	0.309494	0.00169144
1000	1	0	0	0	0	0	0	0	27	0.2	0.5	0.2	0.322148	0.00166044
1000	1	0	0	0	0	0	0	0	28	0.2	0.5	0.2	0.334453	0.0016303
1000	1	0	0	0	0	0	0	0	29	0.2	0.5	0.2	0.34641	0.00160101
1000	1	0	0	0	0	0	0	0	30	0.2	0.5	0.2	0.358021	0.00157257
1000	1	0	0	0	0	0	0	0	0	0.2	0.6	0.2	0	0.00385671
1000	1	0	0	0	0	0	0	0	1	0.2	0.6	0.2	0.00380681	0.00384203
1000	1	0	0	0	0	0	0	0	2	0.2	0.6	0.2	0.015039	0.00379871
1000	1	0	0	0	0	0	0	0	3	0.2	0.6	0.2	0.0328095	0.00373017
1000	1	0	0	0	0	0	0	0	4	0.2	0.6	0.2	0.055852	0.0036413
1000	1	0	0	0	0	0	0	0	5	0.2	0.6	0.2	0.0827484	0.00353757
1000	1	0	0	0	0	0	0	0	6	0.2	0.6	0.2	0.112129	0.00342425
1000	1	0	0	0	0	0	0	0	7	0.2	0.6	0.2	0.142803	0.00330595
1000	1	0	0	0	0	0	0	0	8	0.2	0.6	0.2	0.173819	0.00318633
1000	1	0	0	0	0	0	0	0	9	0.2	0.6	0.2	0.204469	0.00306812
1000	1	0	0	0	0	0	0	0	10	0.2	0.6	0.2	0.23426	0.00295322
1000	1	0	0	0	0	0	0	0	11	0.2	0.6	0.2	0.262875	0.00284286
1000	1	0	0	0	0	0	0	0	12	0.2	0.6	0.2	0.29013	0.00273775
1000	1	0	0	0	0	0	0	0	13	0.2	0.6	0.2	0.315938	0.00263821
1000	1	0	0	0	0	0	0	0	14	0.2	0.6	0.2	0.340279	0.00254433
1000	1	0	0	0	0	0	0	0	15	0.2	0.6	0.2	0.363179	0.00245602
1000	1	0	0	0	0	0	0	0	16	0.2	0.6	0.2	0.38469	0.00237305
1000	1	0	0	0	0	0	0	0	17	0.2	0.6	0.2	0.404881	0.00229518
1000	1	0	0	0	0	0	0	0	18	0.2	0.6	0.2	0.423832	0.00222209
1000	1	0	0	0	0	0	0	0	19	0.2	0.6	0.2	0.441623	0.00215348
1000	1	0	0	0	0	0	0	0	20	0.2	0.6	0.2	0.458334	0.00208903
1000	1	0	0	0	0	0	0	0	21	0.2	0.6	0.2	0.474045	0.00202843
1000	1	0	0	0	0	0	0	0	22	0.2	0.6	0.2	0.48883	0.00197142
1000	1	0	0	0	0	0	0	0	23	0.2	0.6	0.2	0.502757	0.0019177
1000	1	0	0	0	0	0	0	0	24	0.2	0.6	0.2	0.515893	0.00186704
1000	1	0	0	0	0	0	0	0	25	0.2	0.6	0.2	0.528296	0.00181921
1000	1	0	0	0	0	0	0	0	26	0.2	0.6	0.2	0.540022	0.00177398
1000	1	0	0	0	0	0	0	0	27	0.2	0.6	0.2	0.551121	0.00173118
1000	1	0	0	0	0	0	0	0	28	0.2	0.6	0.2	0.56164	0.00169061
1000	1	0	0	0	0	0	0	0	29	0.2	0.6	0.2	0.571622	0.00165211
1000	1	0	0	0	0	0	0	0	30	0.2	0.6	0.2	0.581103	0.00161554
1000	1	0	0	0	0	0	0	0	0	0.2	0.7	0.2	0	0.00331856
1000	1	0	0	0	0	0	0	0	1	0.2	0.7	0.2	0.00470687	0.00330294
1000	1	0	0	0	0	0	0	0	2	0.2	0.7	0.2	0.0185563	0.00325698
1000	1	0	0	0	0	0	0	0	3	0.2	0.7	0.2	0.0399748	0.0031859
1000	1	0	0	0	0	0	0	0	4	0.2	0.7	0.2	0.066881	0.00309661
1000	1	0	0	0	0	0	0	0	5	0.2	0.7	0.2	0.0971801	0.00299605
1000	1	0	0	0	0	0	0	0	6	0.2	0.7	0.2	0.129092	0.00289015
1000	1	0	0	0	0	0	0	0	7	0.2	0.7	0.2	0.161278	0.00278334
1000	1	0	0	0	0	0	0	0	8	0.2	0.7	0.2	0.192824	0.00267865
1000	1	0	0	0	0	0	0	0	9	0.2	0.7	0.2	0.223163	0.00257797
1000	1	0	0	0	0	0	0	0	10	0.2	0.7	0.2	0.251983	0.00248233
1000	1	0	0	0	0	0	0	0	11	0.2	0.7	0.2	0.279142	0.0023922
1000	1	0	0	0	0	0	0	0	12	0.2	0.7	0.2	0.304613	0.00230767
1000	1	0	0	0	0	0	0	0	13	0.2	0.7	0.2	0.328434	0.00222862
1000	1	0	0	0	0	0	0	0	14	0.2	0.7	0.2	0.350683	0.00215478
1000	1	0	0	0	0	0	0	0	15	0.2	0.7	0.2	0.371458	0.00208584
1000	1	0	0	0	0	0	0	0	16	0.2	0.7	0.2	0.390864	0.00202144
1000	1	0	0	0	0	0	0	0	17	0.2	0.7	0.2	0.409006	0.00196123
1000	1	0	0	0	0	0	0	0	18	0.2	0.7	0.2	0.425985	0.00190489
1000	1	0	0	0	0	0	0	0	19	0.2	0.7	0.2	0.441898	0.00185208
1000	1	0	0	0	0	0	0	0	20	0.2	0.7	0.2	0.456834	0.00180251
1000	1	0	0	0	0	0	0	0	21	0.2	0.7	0.2	0.470874	0.00175592
1000	1	0	0	0	0	0	0	0	22	0.2	0.7	0.2	0.484093	0.00171205
1000	1	0	0	0	0	0	0	0	23	0.2	0.7	0.2	0.496557	0.00167069
1000	1	0	0	0	0	0	0	0	24	0.2	0.7	0.2	0.508329	0.00163163
1000	1	0	0	0	0	0	0	0	25	0.2	0.7	0.2	0.519463	0.00159468
1000	1	0	0	0	0	0	0	0	26	0.2	0.7	0.2	0.530009	0.00155968
1000	1	0	0	0	0	0	0	0	27	0.2	0.7	0.2	0.540013	0.00152648
1000	1	0	0	0	0	0	0	0	28	0.2	0.7	0.2	0.549517	0.00149494
1000	1	0	0	0	0	0	0	0	29	0.2	0.7	0.2	0.558556	0.00146495
1000	1	0	0	0	0	0	0	0	30	0.2	0.7	0.2	0.567164	0.00143638
1000	1	0	0	0	0	0	0	0	0	0.2	0.8	0.2	0	0.0022113
1000	1	0	0	0	0	0	0	0	1	0.2	0.8	0.2	0.00254364	0.00220567
1000	1	0	0	0	0	0	0	0	2	0.2	0.8	0.2	0.0102765	0.00218857
1000	1	0	0	0	0	0	0	0	3	0.2	0.8	0.2	0.0225227	0.00216149
1000	1	0	0	0	0	0	0	0	4	0.2	0.8	0.2	0.0383497	0.00212649
1000	1	0	0	0	0	0	0	0	5	0.2	0.8	0.2	0.0567613	0.00208578
1000	1	0	0	0	0	0	0	0	6	0.2	0.8	0.2	0.0768419	0.00204138
1000	1	0	0	0	0	0	0	0	7	0.2	0.8	0.2	0.0978323	0.00199496
1000	1	0	0	0	0	0	0	0	8	0.2	0.8	0.2	0.119148	0.00194782
1000	1	0	0	0	0	0	0	0	9	0.2	0.8	0.2	0.140366	0.0019009
1000	1	0	0	0	0	0	0	0	10	0.2	0.8	0.2	0.161194	0.00185485
1000	1	0	0	0	0	0	0	0	11	0.2	0.8	0.2	0.18144	0.00181008
1000	1	0	0	0	0	0	0	0	12	0.2	0.8	0.2	0.200988	0.00176685
1000	1	0	0	0	0	0	0	0	13	0.2	0.8	0.2	0.219775	0.00172531
1000	1	0	0	0	0	0	0	0	14	0.2	0.8	0.2	0.237774	0.00168551
1000	1	0	0	0	0	0	0	0	15	0.2	0.8	0.2	0.254983	0.00164745
1000	1	0	0	0	0	0	0	0	16	0.2	0.8	0.2	0.271417	0.00161111
1000	1	0	0	0	0	0	0	0	17	0.2	0.8	0.2	0.2871	0.00157643
1000	1	0	0	0	0	0	0	0	18	0.2	0.8	0.2	0.302063	0.00154334
1000	1	0	0	0	0	0	0	0	19	0.2	0.8	0.2	0.316341	0.00151177
1000	1	0	0	0	0	0	0	0	20	0.2	0.8	0.2	0.329969	0.00148163
1000	1	0	0	0	0	0	0	0	21	0.2	0.8	0.2	0.342984	0.00145285
1000	1	0	0	0	0	0	0	0	22	0.2	0.8	0.2	0.355419	0.00142536
1000	1	0	0	0	0	0	0	0	23	0.2	0.8	0.2	0.36731	0.00139906
1000	1	0	0	0	0	0	0	0	24	0.2	0.8	0.2	0.378688	0.0013739
1000	1	0	0	0	0	0	0	0	25	0.2	0.8	0.2	0.389583	0.00134981
1000	1	0	0	0	0	0	0	0	26	0.2	0.8	0.2	0.400025	0.00132672
1000	1	0	0	0	0	0	0	0	27	0.2	0.8	0.2	0.410039	0.00130457
1000	1	0	0	0	0	0	0	0	28	0.2	0.8	0.2	0.419652	0.00128332
1000	1	0	0	0	0	0	0	0	29	0.2	0.8	0.2	0.428887	0.0012629
1000	1	0	0	0	0	0	0	0	30	0.2	0.8	0.2	0.437766	0.00124326
1000	1	0	0	0	0	0	0	0	0	0.2	0.9	0.2	0	0.00161624
1000	1	0	0	0	0	0	0	0	1	0.2	0.9	0.2	0.00121382	0.00161428
1000	1	0	0	0	0	0	0	0	2	0.2	0.9	0.2	0.00506742	0.00160805
1000	1	0	0	0	0	0	0	0	3	0.2	0.9	0.2	0.0112554	0.00159805
1000	1	0	0	0	0	0	0	0	4	0.2	0.9	0.2	0.019354	0.00158496
1000	1	0	0	0	0	0	0	0	5	0.2	0.9	0.2	0.0289059	0.00156953
1000	1	0	0	0	0	0	0	0	6	0.2	0.9	0.2	0.0394848	0.00155243
1000	1	0	0	0	0	0	0	0	7	0.2	0.9	0.2	0.0507294	0.00153425
1000	1	0	0	0	0	0	0	0	8	0.2	0.9	0.2	0.0623537	0.00151547
1000	1	0	0	0	0	0	0	0	9	0.2	0.9	0.2	0.0741414	0.00149641
1000	1	0	0	0	0	0	0	0	10	0.2	0.9	0.2	0.085935	0.00147735
1000	1	0	0	0	0	0	0	0	11	0.2	0.9	0.2	0.0991509	0.00145599
1000	1	0	0	0	0	0	0	0	12	0.2	0.9	0.2	0.1144	0.00143135
1000	1	0	0	0	0	0	0	0	13	0.2	0.9	0.2	0.129323	0.00140723
1000	1	0	0	0	0	0	0	0	14	0.2	0.9	0.2	0.143869	0.00138372
1000	1	0	0	0	0	0	0	0	15	0.2	0.9	0.2	0.158007	0.00136087
1000	1	0	0	0	0	0	0	0	16	0.2	0.9	0.2	0.171719	0.0013387
1000	1	0	0	0	0	0	0	0	17	0.2	0.9	0.2	0.185	0.00131724
1000	1	0	0	0	0	0	0	0	18	0.2	0.9	0.2	0.19785	0.00129647
1000	1	0	0	0	0	0	0	0	19	0.2	0.9	0.2	0.210276	0.00127639
1000	1	0	0	0	0	0	0	0	20	0.2	0.9	0.2	0.222286	0.00125698
1000	1	0	0	0	0	0	0	0	21	0.2	0.9	0.2	0.233893	0.00123821
1000	1	0	0	0	0	0	0	0	22	0.2	0.9	0.2	0.245111	0.00122008
1000	1	0	0	0	0	0	0	0	23	0.2	0.9	0.2	0.255953	0.00120256
1000	1	0	0	0	0	0	0	0	24	0.2	0.9	0.2	0.266434	0.00118562
1000	1	0	0	0	0	0	0	0	25	0.2	0.9	0.2	0.27657	0.00116924
1000	1	0	0	0	0	0	0	0	26	0.2	0.9	0.2	0.286374	0.00115339
1000	1	0	0	0	0	0	0	0	27	0.2	0.9	0.2	0.295862	0.00113806
1000	1	0	0	0	0	0	0	0	28	0.2	0.9	0.2	0.305046	0.00112321
1000	1	0	0	0	0	0	0	0	29	0.2	0.9	0.2	0.313941	0.00110884
1000	1	0	0	0	0	0	0	0	30	0.2	0.9	0.2	0.322558	0.00109491
1000	1	0	0	0	0	0	0	0	0	0.4	0.3	0.2	0	0.000769379
1000	1	0	0	0	0	0	0	0	1	0.4	0.3	0.2	4.78252e-05	0.000769342
1000	1	0	0	0	0	0	0	0	2	0.4	0.3	0.2	0.000200434	0.000769225
1000	1	0	0	0	0	0	0	0	3	0.4	0.3	0.2	0.000457463	0.000769027
1000	1	0	0	0	0	0	0	0	4	0.4	0.3	0.2	0.000818447	0.000768749
1000	1	0	0	0	0	0	0	0	5	0.4	0.3	0.2	0.00128282	0.000768392
1000	1	0	0	0	0	0	0	0	6	0.4	0.3	0.2	0.00184993	0.000767956
1000	1	0	0	0	0	0	0	0	7	0.4	0.3	0.2	0.00251901	0.000767441
1000	1	0	0	0	0	0	0	0	8	0.4	0.3	0.2	0.00328921	0.000766848
1000	1	0	0	0	0	0	0	0	9	0.4	0.3	0.2	0.00415959	0.000766179
1000	1	0	0	0	0	0	0	0	10	0.4	0.3	0.2	0.00512911	0.000765433
1000	1	0	0	0	0	0	0	0	11	0.4	0.3	0.2	0.00619665	0.000764611
1000	1	0	0	0	0	0	0	0	12	0.4	0.3	0.2	0.00736102	0.000763716
1000	1	0	0	0	0	0	0	0	13	0.4	0.3	0.2	0.00862091	0.000762746
1000	1	0	0	0	0	0	0	0	14	0.4	0.3	0.2	0.00997498	0.000761705
1000	1	0	0	0	0	0	0	0	15	0.4	0.3	0.2	0.0114218	0.000760591
1000	1	0	0	0	0	0	0	0	16	0.4	0.3	0.2	0.0129598	0.000759408
1000	1	0	0	0	0	0	0	0	17	0.4	0.3	0.2	0.0145874	0.000758156
1000	1	0	0	0	0	0	0	0	18	0.4	0.3	0.2	0.016303	0.000756836
1000	1	0	0	0	0	0	0	0	19	0.4	0.3	0.2	0.0181049	0.000755449
1000	1	0	0	0	0	0	0	0	20	0.4	0.3	0.2	0.0199914	0.000753998
1000	1	0	0	0	0	0	0	0	21	0.4	0.3	0.2	0.0219605	0.000752483
1000	1	0	0	0	0	0	0	0	22	0.4	0.3	0.2	0.0240106	0.000750906
1000	1	0	0	0	0	0	0	0	23	0.4	0.3	0.2	0.0261395	0.000749268
1000	1	0	0	0	0	0	0	0	24	0.4	0.3	0.2	0.0283455	0.00074757
1000	1	0	0	0	0	0	0	0	25	0.4	0.3	0.2	0.0306264	0.000745816
1000	1	0	0	0	0	0	0	0	26	0.4	0.3	0.2	0.0329804	0.000744004
1000	1	0	0	0	0	0	0	0	27	0.4	0.3	0.2	0.0354054	0.000742139
1000	1	0	0	0	0	0	0	0	28	0.4	0.3	0.2	0.0378993	0.00074022
1000	1	0	0	0	0	0	0	0	29	0.4	0.3	0.2	0.0404599	0.00073825
1000	1	0	0	0	0	0	0	0	30	0.4	0.3	0.2	0.0430853	0.00073623
1000	1	0	0	0	0	0	0	0	0	0.4	0.4	0.2	0	0.00124173
1000	1	0	0	0	0	0	0	0	1	0.4	0.4	0.2	0.000140412	0.00124156
1000	1	0	0	0	0	0	0	0	2	0.4	0.4	0.2	0.000577936	0.00124102
1000	1	0	0	0	0	0	0	0	3	0.4	0.4	0.2	0.00131089	0.00124011
1000	1	0	0	0	0	0	0	0	4	0.4	0.4	0.2	0.00233672	0.00123883
1000	1	0	0	0	0	0	0	0	5	0.4	0.4	0.2	0.00365206	0.0012372
1000	1	0	0	0	0	0	0	0	6	0.4	0.4	0.2	0.00525271	0.00123521
1000	1	0	0	0	0	0	0	0	7	0.4	0.4	0.2	0.00713369	0.00123288
1000	1	0	0	0	0	0	0	0	8	0.4	0.4	0.2	0.0092893	0.0012302
1000	1	0	0	0	0	0	0	0	9	0.4	0.4	0.2	0.0117131	0.00122719
1000	1	0	0	0	0	0	0	0	10	0.4	0.4	0.2	0.0143982	0.00122386
1000	1	0	0	0	0	0	0	0	11	0.4	0.4	0.2	0.0173367	0.00122021
1000	1	0	0	0	0	0	0	0	12	0.4	0.4	0.2	0.0205206	0.00121625
1000	1	0	0	0	0	0	0	0	13	0.4	0.4	0.2	0.0239412	0.00121201
1000	1	0	0	0	0	0	0	0	14	0.4	0.4	0.2	0.0275894	0.00120748
1000	1	0	0	0	0	0	0	0	15	0.4	0.4	0.2	0.0314557	0.00120267
1000	1	0	0	0	0	0	0	0	16	0.4	0.4	0.2	0.0355305	0.00119761
1000	1	0	0	0	0	0	0	0	17	0.4	0.4	0.2	0.0398037	0.00119231
1000	1	0	0	0	0	0	0	0	18	0.4	0.4	0.2	0.0442652	0.00118677
1000	1	0	0	0	0	0	0	0	19	0.4	0.4	0.2	0.0489046	0.00118101
1000	1	0	0	0	0	0	0	0	20	0.4	0.4	0.2	0.0537117	0.00117504
1000	1	0	0	0	0	0	0	0	21	0.4	0.4	0.2	0.058676	0.00116887
1000	1	0	0	0	0	0	0	0	22	0.4	0.4	0.2	0.0637871	0.00116253
1000	1	0	0	0	0	0	0	0	23	0.4	0.4	0.2	0.0690348	0.00115601
1000	1	0	0	0	0	0	0	0	24	0.4	0.4	0.2	0.0744089	0.00114934
1000	1	0	0	0	0	0	0	0	25	0.4	0.4	0.2	0.0798994	0.00114252
1000	1	0	0	0	0	0	0	0	26	0.4	0.4	0.2	0.0854964	0.00113557
1000	1	0	0	0	0	0	0	0	27	0.4	0.4	0.2	0.0911903	0.0011285
1000	1	0	0	0	0	0	0	0	28	0.4	0.4	0.2	0.0969718	0.00112132
1000	1	0	0	0	0	0	0	0	29	0.4	0.4	0.2	0.102832	0.00111404
1000	1	0	0	0	0	0	0	0	30	0.4	0.4	0.2	0.108761	0.00110668
1000	1	0	0	0	0	0	0	0	0	0.4	0.5	0.2	0	0.00198179
1000	1	0	0	0	0	0	0	0	1	0.4	0.5	0.2	0.000467411	0.00198087
1000	1	0	0	0	0	0	0	0	2	0.4	0.5	0.2	0.0019047	0.00197802
1000	1	0	0	0	0	0	0	0	3	0.4	0.5	0.2	0.00429663	0.00197328
1000	1	0	0	0	0	0	0	0	4	0.4	0.5	0.2	0.00761879	0.00196669
1000	1	0	0	0	0	0	0	0	5	0.4	0.5	0.2	0.0118382	0.00195833
1000	1	0	0	0	0	0	0	0	6	0.4	0.5	0.2	0.0169145	0.00194827
1000	1	0	0	0	0	0	0	0	7	0.4	0.5	0.2	0.0228003	0.00193661
1000	1	0	0	0	0	0	0	0	8	0.4	0.5	0.2	0.0294431	0.00192344
1000	1	0	0	0	0	0	0	0	9	0.4	0.5	0.2	0.0367861	0.00190889
1000	1	0	0	0	0	0	0	0	10	0.4	0.5	0.2	0.0447695	0.00189307
1000	1	0	0	0	0	0	0	0	11	0.4	0.5	0.2	0.0533315	0.0018761
1000	1	0	0	0	0	0	0	0	12	0.4	0.5	0.2	0.0624097	0.00185811
1000	1	0	0	0	0	0	0	0	13	0.4	0.5	0.2	0.0719422	0.00183922
1000	1	0	0	0	0	0	0	0	14	0.4	0.5	0.2	0.0818679	0.00181955
1000	1	0	0	0	0	0	0	0	15	0.4	0.5	0.2	0.0921279	0.00179921
1000	1	0	0	0	0	0	0	0	16	0.4	0.5	0.2	0.102666	0.00177833
1000	1	0	0	0	0	0	0	0	17	0.4	0.5	0.2	0.113428	0.001757
1000	1	0	0	0	0	0	0	0	18	0.4	0.5	0.2	0.124365	0.00173532
1000	1	0	0	0	0	0	0	0	19	0.4	0.5	0.2	0.135431	0.0017134
1000	1	0	0	0	0	0	0	0	20	0.4	0.5	0.2	0.146581	0.0016913
1000	1	0	0	0	0	0	0	0	21	0.4	0.5	0.2	0.157779	0.00166911
1000	1	0	0	0	0	0	0	0	22	0.4	0.5	0.2	0.168988	0.00164689
1000	1	0	0	0	0	0	0	0	23	0.4	0.5	0.2	0.180177	0.00162472
1000	1	0	0	0	0	0	0	0	24	0.4	0.5	0.2	0.191318	0.00160264
1000	1	0	0	0	0	0	0	0	25	0.4	0.5	0.2	0.202387	0.0015807
1000	1	0	0	0	0	0	0	0	26	0.4	0.5	0.2	0.213361	0.00155895
1000	1	0	0	0	0	0	0	0	27	0.4	0.5	0.2	0.224223	0.00153743
1000	1	0	0	0	0	0	0	0	28	0.4	0.5	0.2	0.234955	0.00151616
1000	1	0	0	0	0	0	0	0	29	0.4	0.5	0.2	0.245545	0.00149517
1000	1	0	0	0	0	0	0	0	30	0.4	0.5	0.2	0.255981	0.00147449
1000	1	0	0	0	0	0	0	0	0	0.4	0.6	0.2	0	0.00291487
1000	1	0	0	0	0	0	0	0	1	0.4	0.6	0.2	0.00156948	0.0029103
1000	1	0	0	0	0	0	0	0	2	0.4	0.6	0.2	0.00634199	0.00289639
1000	1	0	0	0	0	0	0	0	3	0.4	0.6	0.2	0.0141508	0.00287363
1000	1	0	0	0	0	0	0	0	4	0.4	0.6	0.2	0.0247367	0.00284277
1000	1	0	0	0	0	0	0	0	5	0.4	0.6	0.2	0.0377706	0.00280478
1000	1	0	0	0	0	0	0	0	6	0.4	0.6	0.2	0.0528809	0.00276073
1000	1	0	0	0	0	0	0	0	7	0.4	0.6	0.2	0.0696789	0.00271177
1000	1	0	0	0	0	0	0	0	8	0.4	0.6	0.2	0.0877819	0.002659
1000	1	0	0	0	0	0	0	0	9	0.4	0.6	0.2	0.106831	0.00260347
1000	1	0	0	0	0	0	0	0	10	0.4	0.6	0.2	0.126501	0.00254614
1000	1	0	0	0	0	0	0	0	11	0.4	0.6	0.2	0.14651	0.00248781
1000	1	0	0	0	0	0	0	0	12	0.4	0.6	0.2	0.16662	0.00242919
1000	1	0	0	0	0	0	0	0	13	0.4	0.6	0.2	0.186636	0.00237085
1000	1	0	0	0	0	0	0	0	14	0.4	0.6	0.2	0.2064	0.00231324
1000	1	0	0	0	0	0	0	0	15	0.4	0.6	0.2	0.225792	0.00225671
1000	1	0	0	0	0	0	0	0	16	0.4	0.6	0.2	0.244722	0.00220153
1000	1	0	0	0	0	0	0	0	17	0.4	0.6	0.2	0.263124	0.00214789
1000	1	0	0	0	0	0	0	0	18	0.4	0.6	0.2	0.280953	0.00209592
1000	1	0	0	0	0	0	0	0	19	0.4	0.6	0.2	0.298184	0.0020457
1000	1	0	0	0	0	0	0	0	20	0.4	0.6	0.2	0.314802	0.00199726
1000	1	0	0	0	0	0	0	0	21	0.4	0.6	0.2	0.330803	0.00195062
1000	1	0	0	0	0	0	0	0	22	0.4	0.6	0.2	0.346193	0.00190576
1000	1	0	0	0	0	0	0	0	23	0.4	0.6	0.2	0.360981	0.00186265
1000	1	0	0	0	0	0	0	0	24	0.4	0.6	0.2	0.375183	0.00182125
1000	1	0	0	0	0	0	0	0	25	0.4	0.6	0.2	0.388816	0.00178151
1000	1	0	0	0	0	0	0	0	26	0.4	0.6	0.2	0.401901	0.00174337
1000	1	0	0	0	0	0	0	0	27	0.4	0.6	0.2	0.414459	0.00170677
1000	1	0	0	0	0	0	0	0	28	0.4	0.6	0.2	0.426512	0.00167164
1000	1	0	0	0	0	0	0	0	29	0.4	0.6	0.2	0.438082	0.00163791
1000	1	0	0	0	0	0	0	0	30	0.4	0.6	0.2	0.449191	0.00160553
1000	1	0	0	0	0	0	0	0	0	0.4	0.7	0.2	0	0.00284436
1000	1	0	0	0	0	0	0	0	1	0.4	0.7	0.2	0.00226794	0.0028379
1000	1	0	0	0	0	0	0	0	2	0.4	0.7	0.2	0.00920119	0.00281818
1000	1	0	0	0	0	0	0	0	3	0.4	0.7	0.2	0.0204075	0.00278631
1000	1	0	0	0	0	0	0	0	4	0.4	0.7	0.2	0.0353012	0.00274395
1000	1	0	0	0	0	0	0	0	5	0.4	0.7	0.2	0.0531842	0.00269308
1000	1	0	0	0	0	0	0	0	6	0.4	0.7	0.2	0.0733281	0.00263578
1000	1	0	0	0	0	0	0	0	7	0.4	0.7	0.2	0.0950398	0.00257402
1000	1	0	0	0	0	0	0	0	8	0.4	0.7	0.2	0.117705	0.00250956
1000	1	0	0	0	0	0	0	0	9	0.4	0.7	0.2	0.140811	0.00244383
1000	1	0	0	0	0	0	0	0	10	0.4	0.7	0.2	0.163947	0.00237803
1000	1	0	0	0	0	0	0	0	11	0.4	0.7	0.2	0.186804	0.00231301
1000	1	0	0	0	0	0	0	0	12	0.4	0.7	0.2	0.209153	0.00224944
1000	1	0	0	0	0	0	0	0	13	0.4	0.7	0.2	0.230838	0.00218776
1000	1	0	0	0	0	0	0	0	14	0.4	0.7	0.2	0.251758	0.00212826
1000	1	0	0	0	0	0	0	0	15	0.4	0.7	0.2	0.271853	0.0020711
1000	1	0	0	0	0	0	0	0	16	0.4	0.7	0.2	0.291096	0.00201637
1000	1	0	0	0	0	0	0	0	17	0.4	0.7	0.2	0.309481	0.00196407
1000	1	0	0	0	0	0	0	0	18	0.4	0.7	0.2	0.327022	0.00191418
1000	1	0	0	0	0	0	0	0	19	0.4	0.7	0.2	0.34374	0.00186663
1000	1	0	0	0	0	0	0	0	20	0.4	0.7	0.2	0.359666	0.00182133
1000	1	0	0	0	0	0	0	0	21	0.4	0.7	0.2	0.374834	0.00177819
1000	1	0	0	0	0	0	0	0	22	0.4	0.7	0.2	0.389281	0.00173709
1000	1	0	0	0	0	0	0	0	23	0.4	0.7	0.2	0.403045	0.00169794
1000	1	0	0	0	0	0	0	0	24	0.4	0.7	0.2	0.416162	0.00166063
1000	1	0	0	0	0	0	0	0	25	0.4	0.7	0.2	0.428671	0.00162505
1000	1	0	0	0	0	0	0	0	26	0.4	0.7	0.2	0.440606	0.00159111
1000	1	0	0	0	0	0	0	0	27	0.4	0.7	0.2	0.452001	0.00155869
1000	1	0	0	0	0	0	0	0	28	0.4	0.7	0.2	0.462889	0.00152773
1000	1	0	0	0	0	0	0	0	29	0.4	0.7	0.2	0.473299	0.00149812
1000	1	0	0	0	0	0	0	0	30	0.4	0.7	0.2	0.48326	0.00146978
1000	1	0	0	0	0	0	0	0	0	0.4	0.8	0.2	0	0.00209552
1000	1	0	0	0	0	0	0	0	1	0.4	0.8	0.2	0.00147189	0.00209244
1000	1	0	0	0	0	0	0	0	2	0.4	0.8	0.2	0.00612696	0.00208269
1000	1	0	0	0	0	0	0	0	3	0.4	0.8	0.2	0.0137427	0.00206673
1000	1	0	0	0	0	0	0	0	4	0.4	0.8	0.2	0.0239817	0.00204527
1000	1	0	0	0	0	0	0	0	5	0.4	0.8	0.2	0.0364343	0.00201918
1000	1	0	0	0	0	0	0	0	6	0.4	0.8	0.2	0.0506613	0.00198936
1000	1	0	0	0	0	0	0	0	7	0.4	0.8	0.2	0.0662321	0.00195673
1000	1	0	0	0	0	0	0	0	8	0.4	0.8	0.2	0.0827504	0.00192212
1000	1	0	0	0	0	0	0	0	9	0.4	0.8	0.2	0.0998704	0.00188624
1000	1	0	0	0	0	0	0	0	10	0.4	0.8	0.2	0.117302	0.00184971
1000	1	0	0	0	0	0	0	0	11	0.4	0.8	0.2	0.134812	0.00181302
1000	1	0	0	0	0	0	0	0	12	0.4	0.8	0.2	0.152216	0.00177655
1000	1	0	0	0	0	0	0	0	13	0.4	0.8	0.2	0.169375	0.00174059
1000	1	0	0	0	0	0	0	0	14	0.4	0.8	0.2	0.186188	0.00170536
1000	1	0	0	0	0	0	0	0	15	0.4	0.8	0.2	0.202581	0.00167101
1000	1	0	0	0	0	0	0	0	16	0.4	0.8	0.2	0.218507	0.00163763
1000	1	0	0	0	0	0	0	0	17	0.4	0.8	0.2	0.233936	0.0016053
1000	1	0	0	0	0	0	0	0	18	0.4	0.8	0.2	0.248852	0.00157405
1000	1	0	0	0	0	0	0	0	19	0.4	0.8	0.2	0.263249	0.00154388
1000	1	0	0	0	0	0	0	0	20	0.4	0.8	0.2	0.277131	0.00151479
1000	1	0	0	0	0	0	0	0	21	0.4	0.8	0.2	0.290505	0.00148676
1000	1	0	0	0	0	0	0	0	22	0.4	0.8	0.2	0.303385	0.00145977
1000	1	0	0	0	0	0	0	0	23	0.4	0.8	0.2	0.315785	0.00143379
1000	1	0	0	0	0	0	0	0	24	0.4	0.8	0.2	0.327723	0.00140877
1000	1	0	0	0	0	0	0	0	25	0.4	0.8	0.2	0.339216	0.00138469
1000	1	0	0	0	0	0	0	0	26	0.4	0.8	0.2	0.350282	0.0013615
1000	1	0	0	0	0	0	0	0	27	0.4	0.8	0.2	0.360941	0.00133916
1000	1	0	0	0	0	0	0	0	28	0.4	0.8	0.2	0.371211	0.00131764
1000	1	0	0	0	0	0	0	0	29	0.4	0.8	0.2	0.381109	0.0012969
1000	1	0	0	0	0	0	0	0	30	0.4	0.8	0.2	0.390653	0.0012769
1000	1	0	0	0	0	0	0	0	0	0.4	0.9	0.2	0	0.0016179
1000	1	0	0	0	0	0	0	0	1	0.4	0.9	0.2	0.000934248	0.00161639
1000	1	0	0	0	0	0	0	0	2	0.4	0.9	0.2	0.00400052	0.00161143
1000	1	0	0	0	0	0	0	0	3	0.4	0.9	0.2	0.00907546	0.00160322
1000	1	0	0	0	0	0	0	0	4	0.4	0.9	0.2	0.0159699	0.00159206
1000	1	0	0	0	0	0	0	0	5	0.4	0.9	0.2	0.0244501	0.00157834
1000	1	0	0	0	0	0	0	0	6	0.4	0.9	0.2	0.0342604	0.00156247
1000	1	0	0	0	0	0	0	0	7	0.4	0.9	0.2	0.0451431	0.00154486
1000	1	0	0	0	0	0	0	0	8	0.4	0.9	0.2	0.0568537	0.00152592
1000	1	0	0	0	0	0	0	0	9	0.4	0.9	0.2	0.0691711	0.00150599
1000	1	0	0	0	0	0	0	0	10	0.4	0.9	0.2	0.0819024	0.00148539
1000	1	0	0	0	0	0	0	0	11	0.4	0.9	0.2	0.0948841	0.00146439
1000	1	0	0	0	0	0	0	0	12	0.4	0.9	0.2	0.107981	0.0014432
1000	1	0	0	0	0	0	0	0	13	0.4	0.9	0.2	0.121085	0.001422
1000	1	0	0	0	0	0	0	0	14	0.4	0.9	0.2	0.134109	0.00140092
1000	1	0	0	0	0	0	0	0	15	0.4	0.9	0.2	0.146986	0.00138009
1000	1	0	0	0	0	0	0	0	16	0.4	0.9	0.2	0.159666	0.00135958
1000	1	0	0	0	0	0	0	0	17	0.4	0.9	0.2	0.172109	0.00133944
1000	1	0	0	0	0	0	0	0	18	0.4	0.9	0.2	0.18429	0.00131974
1000	1	0	0	0	0	0	0	0	19	0.4	0.9	0.2	0.196189	0.00130049
1000	1	0	0	0	0	0	0	0	20	0.4	0.9	0.2	0.207795	0.00128171
1000	1	0	0	0	0	0	0	0	21	0.4	0.9	0.2	0.2191	0.00126342
1000	1	0	0	0	0	0	0	0	22	0.4	0.9	0.2	0.230103	0.00124562
1000	1	0	0	0	0	0	0	0	23	0.4	0.9	0.2	0.240804	0.0012283
1000	1	0	0	0	0	0	0	0	24	0.4	0.9	0.2	0.251205	0.00121147
1000	1	0	0	0	0	0	0	0	25	0.4	0.9	0.2	0.261312	0.00119512
1000	1	0	0	0	0	0	0	0	26	0.4	0.9	0.2	0.271132	0.00117924
1000	1	0	0	0	0	0	0	0	27	0.4	0.9	0.2	0.28067	0.0011638
1000	1	0	0	0	0	0	0	0	28	0.4	0.9	0.2	0.289935	0.00114881
1000	1	0	0	0	0	0	0	0	29	0.4	0.9	0.2	0.298935	0.00113425
1000	1	0	0	0	0	0	0	0	30	0.4	0.9	0.2	0.307679	0.0011201
1000	1	0	0	0	0	0	0	0	0	0.6	0.3	0.2	0	0.00063281
1000	1	0	0	0	0	0	0	0	1	0.6	0.3	0.2	2.48055e-05	0.000632794
1000	1	0	0	0	0	0	0	0	2	0.6	0.3	0.2	0.000108425	0.000632741
1000	1	0	0	0	0	0	0	0	3	0.6	0.3	0.2	0.000250694	0.000632651
1000	1	0	0	0	0	0	0	0	4	0.6	0.3	0.2	0.000451415	0.000632524
1000	1	0	0	0	0	0	0	0	5	0.6	0.3	0.2	0.000710364	0.00063236
1000	1	0	0	0	0	0	0	0	6	0.6	0.3	0.2	0.00102729	0.00063216
1000	1	0	0	0	0	0	0	0	7	0.6	0.3	0.2	0.0014019	0.000631923
1000	1	0	0	0	0	0	0	0	8	0.6	0.3	0.2	0.00183389	0.000631649
1000	1	0	0	0	0	0	0	0	9	0.6	0.3	0.2	0.00232291	0.00063134
1000	1	0	0	0	0	0	0	0	10	0.6	0.3	0.2	0.00286859	0.000630995
1000	1	0	0	0	0	0	0	0	11	0.6	0.3	0.2	0.00347055	0.000630614
1000	1	0	0	0	0	0	0	0	12	0.6	0.3	0.2	0.00412834	0.000630197
1000	1	0	0	0	0	0	0	0	13	0.6	0.3	0.2	0.00484153	0.000629746
1000	1	0	0	0	0	0	0	0	14	0.6	0.3	0.2	0.00560962	0.00062926
1000	1	0	0	0	0	0	0	0	15	0.6	0.3	0.2	0.00643213	0.00062874
1000	1	0	0	0	0	0	0	0	16	0.6	0.3	0.2	0.00730851	0.000628185
1000	1	0	0	0	0	0	0	0	17	0.6	0.3	0.2	0.00823822	0.000627597
1000	1	0	0	0	0	0	0	0	18	0.6	0.3	0.2	0.00922067	0.000626975
1000	1	0	0	0	0	0	0	0	19	0.6	0.3	0.2	0.0102553	0.00062632
1000	1	0	0	0	0	0	0	0	20	0.6	0.3	0.2	0.0113414	0.000625633
1000	1	0	0	0	0	0	0	0	21	0.6	0.3	0.2	0.0124784	0.000624913
1000	1	0	0	0	0	0	0	0	22	0.6	0.3	0.2	0.0136657	0.000624162
1000	1	0	0	0	0	0	0	0	23	0.6	0.3	0.2	0.0149024	0.000623379
1000	1	0	0	0	0	0	0	0	24	0.6	0.3	0.2	0.016188	0.000622566
1000	1	0	0	0	0	0	0	0	25	0.6	0.3	0.2	0.0175218	0.000621722
1000	1	0	0	0	0	0	0	0	26	0.6	0.3	0.2	0.0189029	0.000620848
1000	1	0	0	0	0	0	0	0	27	0.6	0.3	0.2	0.0203306	0.000619944
1000	1	0	0	0	0	0	0	0	28	0.6	0.3	0.2	0.0218042	0.000619012
1000	1	0	0	0	0	0	0	0	29	0.6	0.3	0.2	0.0233228	0.000618051
1000	1	0	0	0	0	0	0	0	30	0.6	0.3	0.2	0.0248858	0.000617062
1000	1	0	0	0	0	0	0	0	0	0.6	0.4	0.2	0	0.00101146
1000	1	0	0	0	0	0	0	0	1	0.6	0.4	0.2	7.317e-05	0.00101139
1000	1	0	0	0	0	0	0	0	2	0.6	0.4	0.2	0.000308903	0.00101115
1000	1	0	0	0	0	0	0	0	3	0.6	0.4	0.2	0.000706603	0.00101075
1000	1	0	0	0	0	0	0	0	4	0.6	0.4	0.2	0.00126542	0.00101018
1000	1	0	0	0	0	0	0	0	5	0.6	0.4	0.2	0.00198424	0.00100945
1000	1	0	0	0	0	0	0	0	6	0.6	0.4	0.2	0.00286173	0.00100857
1000	1	0	0	0	0	0	0	0	7	0.6	0.4	0.2	0.00389627	0.00100752
1000	1	0	0	0	0	0	0	0	8	0.6	0.4	0.2	0.00508604	0.00100632
1000	1	0	0	0	0	0	0	0	9	0.6	0.4	0.2	0.00642899	0.00100496
1000	1	0	0	0	0	0	0	0	10	0.6	0.4	0.2	0.00792282	0.00100345
1000	1	0	0	0	0	0	0	0	11	0.6	0.4	0.2	0.00956505	0.00100179
1000	1	0	0	0	0	0	0	0	12	0.6	0.4	0.2	0.011353	0.000999978
1000	1	0	0	0	0	0	0	0	13	0.6	0.4	0.2	0.0132838	0.000998025
1000	1	0	0	0	0	0	0	0	14	0.6	0.4	0.2	0.0153544	0.000995931
1000	1	0	0	0	0	0	0	0	15	0.6	0.4	0.2	0.0175615	0.000993699
1000	1	0	0	0	0	0	0	0	16	0.6	0.4	0.2	0.0199018	0.000991331
1000	1	0	0	0	0	0	0	0	17	0.6	0.4	0.2	0.0223719	0.000988833
1000	1	0	0	0	0	0	0	0	18	0.6	0.4	0.2	0.0249679	0.000986207
1000	1	0	0	0	0	0	0	0	19	0.6	0.4	0.2	0.0276863	0.000983458
1000	1	0	0	0	0	0	0	0	20	0.6	0.4	0.2	0.0305232	0.000980588
1000	1	0	0	0	0	0	0	0	21	0.6	0.4	0.2	0.0334746	0.000977603
1000	1	0	0	0	0	0	0	0	22	0.6	0.4	0.2	0.0365365	0.000974506
1000	1	0	0	0	0	0	0	0	23	0.6	0.4	0.2	0.0397048	0.000971301
1000	1	0	0	0	0	0	0	0	24	0.6	0.4	0.2	0.0429755	0.000967993
1000	1	0	0	0	0	0	0	0	25	0.6	0.4	0.2	0.0463444	0.000964586
1000	1	0	0	0	0	0	0	0	26	0.6	0.4	0.2	0.0498073	0.000961083
1000	1	0	0	0	0	0	0	0	27	0.6	0.4	0.2	0.05336	0.00095749
1000	1	0	0	0	0	0	0	0	28	0.6	0.4	0.2	0.0569983	0.000953809
1000	1	0	0	0	0	0	0	0	29	0.6	0.4	0.2	0.0607181	0.000950047
1000	1	0	0	0	0	0	0	0	30	0.6	0.4	0.2	0.0645152	0.000946206
1000	1	0	0	0	0	0	0	0	0	0.6	0.5	0.2	0	0.00156534
1000	1	0	0	0	0	0	0	0	1	0.6	0.5	0.2	0.0002239	0.00156499
1000	1	0	0	0	0	0	0	0	2	0.6	0.5	0.2	0.000929532	0.00156388
1000	1	0	0	0	0	0	0	0	3	0.6	0.5	0.2	0.00211293	0.00156203
1000	1	0	0	0	0	0	0	0	4	0.6	0.5	0.2	0.00376782	0.00155944
1000	1	0	0	0	0	0	0	0	5	0.6	0.5	0.2	0.00588568	0.00155612
1000	1	0	0	0	0	0	0	0	6	0.6	0.5	0.2	0.00845588	0.0015521
1000	1	0	0	0	0	0	0	0	7	0.6	0.5	0.2	0.0114658	0.00154739
1000	1	0	0	0	0	0	0	0	8	0.6	0.5	0.2	0.014901	0.00154201
1000	1	0	0	0	0	0	0	0	9	0.6	0.5	0.2	0.0187455	0.00153599
1000	1	0	0	0	0	0	0	0	10	0.6	0.5	0.2	0.0229818	0.00152936
1000	1	0	0	0	0	0	0	0	11	0.6	0.5	0.2	0.0275911	0.00152215
1000	1	0	0	0	0	0	0	0	12	0.6	0.5	0.2	0.0325537	0.00151438
1000	1	0	0	0	0	0	0	0	13	0.6	0.5	0.2	0.0378491	0.00150609
1000	1	0	0	0	0	0	0	0	14	0.6	0.5	0.2	0.0434562	0.00149731
1000	1	0	0	0	0	0	0	0	15	0.6	0.5	0.2	0.0493534	0.00148808
1000	1	0	0	0	0	0	0	0	16	0.6	0.5	0.2	0.0555191	0.00147843
1000	1	0	0	0	0	0	0	0	17	0.6	0.5	0.2	0.0619314	0.00146839
1000	1	0	0	0	0	0	0	0	18	0.6	0.5	0.2	0.0685687	0.001458
1000	1	0	0	0	0	0	0	0	19	0.6	0.5	0.2	0.0754099	0.0014473
1000	1	0	0	0	0	0	0	0	20	0.6	0.5	0.2	0.0824338	0.0014363
1000	1	0	0	0	0	0	0	0	21	0.6	0.5	0.2	0.0896204	0.00142505
1000	1	0	0	0	0	0	0	0	22	0.6	0.5	0.2	0.0969498	0.00141358
1000	1	0	0	0	0	0	0	0	23	0.6	0.5	0.2	0.104403	0.00140191
1000	1	0	0	0	0	0	0	0	24	0.6	0.5	0.2	0.111962	0.00139008
1000	1	0	0	0	0	0	0	0	25	0.6	0.5	0.2	0.119609	0.00137811
1000	1	0	0	0	0	0	0	0	26	0.6	0.5	0.2	0.127329	0.00136602
1000	1	0	0	0	0	0	0	0	27	0.6	0.5	0.2	0.135105	0.00135385
1000	1	0	0	0	0	0	0	0	28	0.6	0.5	0.2	0.142922	0.00134161
1000	1	0	0	0	0	0	0	0	29	0.6	0.5	0.2	0.150768	0.00132933
1000	1	0	0	0	0	0	0	0	30	0.6	0.5	0.2	0.15863	0.00131703
1000	1	0	0	0	0	0	0	0	0	0.6	0.6	0.2	0	0.00226855
1000	1	0	0	0	0	0	0	0	1	0.6	0.6	0.2	0.000681523	0.00226701
1000	1	0	0	0	0	0	0	0	2	0.6	0.6	0.2	0.00280488	0.00226219
1000	1	0	0	0	0	0	0	0	3	0.6	0.6	0.2	0.00633599	0.00225418
1000	1	0	0	0	0	0	0	0	4	0.6	0.6	0.2	0.0112201	0.0022431
1000	1	0	0	0	0	0	0	0	5	0.6	0.6	0.2	0.0173841	0.00222912
1000	1	0	0	0	0	0	0	0	6	0.6	0.6	0.2	0.0247396	0.00221243
1000	1	0	0	0	0	0	0	0	7	0.6	0.6	0.2	0.033186	0.00219327
1000	1	0	0	0	0	0	0	0	8	0.6	0.6	0.2	0.0426143	0.00217188
1000	1	0	0	0	0	0	0	0	9	0.6	0.6	0.2	0.0529108	0.00214852
1000	1	0	0	0	0	0	0	0	10	0.6	0.6	0.2	0.0639598	0.00212346
1000	1	0	0	0	0	0	0	0	11	0.6	0.6	0.2	0.0756469	0.00209694
1000	1	0	0	0	0	0	0	0	12	0.6	0.6	0.2	0.0878614	0.00206923
1000	1	0	0	0	0	0	0	0	13	0.6	0.6	0.2	0.100498	0.00204057
1000	1	0	0	0	0	0	0	0	14	0.6	0.6	0.2	0.113459	0.00201116
1000	1	0	0	0	0	0	0	0	15	0.6	0.6	0.2	0.126654	0.00198123
1000	1	0	0	0	0	0	0	0	16	0.6	0.6	0.2	0.140001	0.00195095
1000	1	0	0	0	0	0	0	0	17	0.6	0.6	0.2	0.153427	0.00192049
1000	1	0	0	0	0	0	0	0	18	0.6	0.6	0.2	0.166867	0.00189
1000	1	0	0	0	0	0	0	0	19	0.6	0.6	0.2	0.180267	0.00185961
1000	1	0	0	0	0	0	0	0	20	0.6	0.6	0.2	0.193577	0.00182941
1000	1	0	0	0	0	0	0	0	21	0.6	0.6	0.2	0.206756	0.00179951
1000	1	0	0	0	0	0	0	0	22	0.6	0.6	0.2	0.21977	0.00176999
1000	1	0	0	0	0	0	0	0	23	0.6	0.6	0.2	0.23259	0.00174091
1000	1	0	0	0	0	0	0	0	24	0.6	0.6	0.2	0.245194	0.00171231
1000	1	0	0	0	0	0	0	0	25	0.6	0.6	0.2	0.257563	0.00168425
1000	1	0	0	0	0	0	0	0	26	0.6	0.6	0.2	0.269683	0.00165676
1000	1	0	0	0	0	0	0	0	27	0.6	0.6	0.2	0.281544	0.00162985
1000	1	0	0	0	0	0	0	0	28	0.6	0.6	0.2	0.293138	0.00160355
1000	1	0	0	0	0	0	0	0	29	0.6	0.6	0.2	0.30446	0.00157787
1000	1	0	0	0	0	0	0	0	30	0.6	0.6	0.2	0.315508	0.0015528
1000	1	0	0	0	0	0	0	0	0	0.6	0.7	0.2	0	0.00251621
1000	1	0	0	0	0	0	0	0	1	0.6	0.7	0.2	0.00123598	0.0025131
1000	1	0	0	0	0	0	0	0	2	0.6	0.7	0.2	0.0051044	0.00250337
1000	1	0	0	0	0	0	0	0	3	0.6	0.7	0.2	0.0114845	0.00248731
1000	1	0	0	0	0	0	0	0	4	0.6	0.7	0.2	0.0201864	0.00246542
1000	1	0	0	0	0	0	0	0	5	0.6	0.7	0.2	0.0309671	0.00243829
1000	1	0	0	0	0	0	0	0	6	0.6	0.7	0.2	0.0435477	0.00240663
1000	1	0	0	0	0	0	0	0	7	0.6	0.7	0.2	0.0576326	0.00237119
1000	1	0	0	0	0	0	0	0	8	0.6	0.7	0.2	0.072925	0.00233271
1000	1	0	0	0	0	0	0	0	9	0.6	0.7	0.2	0.0891411	0.00229191
1000	1	0	0	0	0	0	0	0	10	0.6	0.7	0.2	0.106019	0.00224944
1000	1	0	0	0	0	0	0	0	11	0.6	0.7	0.2	0.123325	0.00220589
1000	1	0	0	0	0	0	0	0	12	0.6	0.7	0.2	0.140857	0.00216178
1000	1	0	0	0	0	0	0	0	13	0.6	0.7	0.2	0.158443	0.00211753
1000	1	0	0	0	0	0	0	0	14	0.6	0.7	0.2	0.175942	0.0020735
1000	1	0	0	0	0	0	0	0	15	0.6	0.7	0.2	0.193241	0.00202997
1000	1	0	0	0	0	0	0	0	16	0.6	0.7	0.2	0.21025	0.00198717
1000	1	0	0	0	0	0	0	0	17	0.6	0.7	0.2	0.226901	0.00194527
1000	1	0	0	0	0	0	0	0	18	0.6	0.7	0.2	0.243143	0.0019044
1000	1	0	0	0	0	0	0	0	19	0.6	0.7	0.2	0.258942	0.00186465
1000	1	0	0	0	0	0	0	0	20	0.6	0.7	0.2	0.274274	0.00182607
1000	1	0	0	0	0	0	0	0	21	0.6	0.7	0.2	0.289126	0.0017887
1000	1	0	0	0	0	0	0	0	22	0.6	0.7	0.2	0.303491	0.00175256
1000	1	0	0	0	0	0	0	0	23	0.6	0.7	0.2	0.317372	0.00171763
1000	1	0	0	0	0	0	0	0	24	0.6	0.7	0.2	0.330772	0.00168391
1000	1	0	0	0	0	0	0	0	25	0.6	0.7	0.2	0.3437	0.00165138
1000	1	0	0	0	0	0	0	0	26	0.6	0.7	0.2	0.356169	0.00162001
1000	1	0	0	0	0	0	0	0	27	0.6	0.7	0.2	0.368191	0.00158976
1000	1	0	0	0	0	0	0	0	28	0.6	0.7	0.2	0.37978	0.0015606
1000	1	0	0	0	0	0	0	0	29	0.6	0.7	0.2	0.390952	0.00153248
1000	1	0	0	0	0	0	0	0	30	0.6	0.7	0.2	0.401724	0.00150538
1000	1	0	0	0	0	0	0	0	0	0.6	0.8	0.2	0	0.00205229
1000	1	0	0	0	0	0	0	0	1	0.6	0.8	0.2	0.00100207	0.00205023
1000	1	0	0	0	0	0	0	0	2	0.6	0.8	0.2	0.00424663	0.00204357
1000	1	0	0	0	0	0	0	0	3	0.6	0.8	0.2	0.00963341	0.00203252
1000	1	0	0	0	0	0	0	0	4	0.6	0.8	0.2	0.0170046	0.00201739
1000	1	0	0	0	0	0	0	0	5	0.6	0.8	0.2	0.0261578	0.00199861
1000	1	0	0	0	0	0	0	0	6	0.6	0.8	0.2	0.0368615	0.00197664
1000	1	0	0	0	0	0	0	0	7	0.6	0.8	0.2	0.0488698	0.00195199
1000	1	0	0	0	0	0	0	0	8	0.6	0.8	0.2	0.0619366	0.00192518
1000	1	0	0	0	0	0	0	0	9	0.6	0.8	0.2	0.0758262	0.00189667
1000	1	0	0	0	0	0	0	0	10	0.6	0.8	0.2	0.0903209	0.00186692
1000	1	0	0	0	0	0	0	0	11	0.6	0.8	0.2	0.105226	0.00183633
1000	1	0	0	0	0	0	0	0	12	0.6	0.8	0.2	0.120373	0.00180525
1000	1	0	0	0	0	0	0	0	13	0.6	0.8	0.2	0.135618	0.00177396
1000	1	0	0	0	0	0	0	0	14	0.6	0.8	0.2	0.150841	0.00174272
1000	1	0	0	0	0	0	0	0	15	0.6	0.8	0.2	0.165946	0.00171172
1000	1	0	0	0	0	0	0	0	16	0.6	0.8	0.2	0.180855	0.00168112
1000	1	0	0	0	0	0	0	0	17	0.6	0.8	0.2	0.195509	0.00165105
1000	1	0	0	0	0	0	0	0	18	0.6	0.8	0.2	0.209861	0.00162159
1000	1	0	0	0	0	0	0	0	19	0.6	0.8	0.2	0.223879	0.00159282
1000	1	0	0	0	0	0	0	0	20	0.6	0.8	0.2	0.23754	0.00156479
1000	1	0	0	0	0	0	0	0	21	0.6	0.8	0.2	0.250829	0.00153751
1000	1	0	0	0	0	0	0	0	22	0.6	0.8	0.2	0.263737	0.00151102
1000	1	0	0	0	0	0	0	0	23	0.6	0.8	0.2	0.276261	0.00148532
1000	1	0	0	0	0	0	0	0	24	0.6	0.8	0.2	0.288404	0.0014604
1000	1	0	0	0	0	0	0	0	25	0.6	0.8	0.2	0.300167	0.00143626
1000	1	0	0	0	0	0	0	0	26	0.6	0.8	0.2	0.311559	0.00141288
1000	1	0	0	0	0	0	0	0	27	0.6	0.8	0.2	0.322588	0.00139024
1000	1	0	0	0	0	0	0	0	28	0.6	0.8	0.2	0.333263	0.00136834
1000	1	0	0	0	0	0	0	0	29	0.6	0.8	0.2	0.343594	0.00134713
1000	1	0	0	0	0	0	0	0	30	0.6	0.8	0.2	0.353594	0.00132661
1000	1	0	0	0	0	0	0	0	0	0.6	0.9	0.2	0	0.0016187
1000	1	0	0	0	0	0	0	0	1	0.6	0.9	0.2	0.000664375	0.00161762
1000	1	0	0	0	0	0	0	0	2	0.6	0.9	0.2	0.00291747	0.00161398
1000	1	0	0	0	0	0	0	0	3	0.6	0.9	0.2	0.00669981	0.00160785
1000	1	0	0	0	0	0	0	0	4	0.6	0.9	0.2	0.0119169	0.00159941
1000	1	0	0	0	0	0	0	0	5	0.6	0.9	0.2	0.0184465	0.00158884
1000	1	0	0	0	0	0	0	0	6	0.6	0.9	0.2	0.0261465	0.00157637
1000	1	0	0	0	0	0	0	0	7	0.6	0.9	0.2	0.0348637	0.00156226
1000	1	0	0	0	0	0	0	0	8	0.6	0.9	0.2	0.0444414	0.00154676
1000	1	0	0	0	0	0	0	0	9	0.6	0.9	0.2	0.0547265	0.00153011
1000	1	0	0	0	0	0	0	0	10	0.6	0.9	0.2	0.0655739	0.00151255
1000	1	0	0	0	0	0	0	0	11	0.6	0.9	0.2	0.0768501	0.0014943
1000	1	0	0	0	0	0	0	0	12	0.6	0.9	0.2	0.0884357	0.00147555
1000	1	0	0	0	0	0	0	0	13	0.6	0.9	0.2	0.100225	0.00145646
1000	1	0	0	0	0	0	0	0	14	0.6	0.9	0.2	0.112128	0.0014372
1000	1	0	0	0	0	0	0	0	15	0.6	0.9	0.2	0.124068	0.00141787
1000	1	0	0	0	0	0	0	0	16	0.6	0.9	0.2	0.13598	0.00139859
1000	1	0	0	0	0	0	0	0	17	0.6	0.9	0.2	0.14781	0.00137944
1000	1	0	0	0	0	0	0	0	18	0.6	0.9	0.2	0.159517	0.00136049
1000	1	0	0	0	0	0	0	0	19	0.6	0.9	0.2	0.171066	0.00134179
1000	1	0	0	0	0	0	0	0	20	0.6	0.9	0.2	0.18243	0.0013234
1000	1	0	0	0	0	0	0	0	21	0.6	0.9	0.2	0.193588	0.00130534
1000	1	0	0	0	0	0	0	0	22	0.6	0.9	0.2	0.204526	0.00128763
1000	1	0	0	0	0	0	0	0	23	0.6	0.9	0.2	0.215232	0.0012703
1000	1	0	0	0	0	0	0	0	24	0.6	0.9	0.2	0.2257	0.00125336
1000	1	0	0	0	0	0	0	0	25	0.6	0.9	0.2	0.235925	0.00123681
1000	1	0	0	0	0	0	0	0	26	0.6	0.9	0.2	0.245905	0.00122065
1000	1	0	0	0	0	0	0	0	27	0.6	0.9	0.2	0.255641	0.00120489
1000	1	0	0	0	0	0	0	0	28	0.6	0.9	0.2	0.265134	0.00118952
1000	1	0	0	0	0	0	0	0	29	0.6	0.9	0.2	0.274387	0.00117455
1000	1	0	0	0	0	0	0	0	30	0.6	0.9	0.2	0.283404	0.00115995
1000	1	0	0	0	0	0	0	0	0	0.8	0.3	0.2	0	0.000492284
1000	1	0	0	0	0	0	0	0	1	0.8	0.3	0.2	1.04716e-05	0.000492279
1000	1	0	0	0	0	0	0	0	2	0.8	0.3	0.2	4.86839e-05	0.00049226
1000	1	0	0	0	0	0	0	0	3	0.8	0.3	0.2	0.000114571	0.000492228
1000	1	0	0	0	0	0	0	0	4	0.8	0.3	0.2	0.00020806	0.000492182
1000	1	0	0	0	0	0	0	0	5	0.8	0.3	0.2	0.000329075	0.000492122
1000	1	0	0	0	0	0	0	0	6	0.8	0.3	0.2	0.000477532	0.000492049
1000	1	0	0	0	0	0	0	0	7	0.8	0.3	0.2	0.000653343	0.000491963
1000	1	0	0	0	0	0	0	0	8	0.8	0.3	0.2	0.000856413	0.000491863
1000	1	0	0	0	0	0	0	0	9	0.8	0.3	0.2	0.00108664	0.000491749
1000	1	0	0	0	0	0	0	0	10	0.8	0.3	0.2	0.00134392	0.000491623
1000	1	0	0	0	0	0	0	0	11	0.8	0.3	0.2	0.00162814	0.000491483
1000	1	0	0	0	0	0	0	0	12	0.8	0.3	0.2	0.00193919	0.00049133
1000	1	0	0	0	0	0	0	0	13	0.8	0.3	0.2	0.00227693	0.000491163
1000	1	0	0	0	0	0	0	0	14	0.8	0.3	0.2	0.00264125	0.000490984
1000	1	0	0	0	0	0	0	0	15	0.8	0.3	0.2	0.00303201	0.000490792
1000	1	0	0	0	0	0	0	0	16	0.8	0.3	0.2	0.00344906	0.000490586
1000	1	0	0	0	0	0	0	0	17	0.8	0.3	0.2	0.00389227	0.000490368
1000	1	0	0	0	0	0	0	0	18	0.8	0.3	0.2	0.00436148	0.000490137
1000	1	0	0	0	0	0	0	0	19	0.8	0.3	0.2	0.00485653	0.000489893
1000	1	0	0	0	0	0	0	0	20	0.8	0.3	0.2	0.00537727	0.000489637
1000	1	0	0	0	0	0	0	0	21	0.8	0.3	0.2	0.00592353	0.000489368
1000	1	0	0	0	0	0	0	0	22	0.8	0.3	0.2	0.00649514	0.000489087
1000	1	0	0	0	0	0	0	0	23	0.8	0.3	0.2	0.00709192	0.000488793
1000	1	0	0	0	0	0	0	0	24	0.8	0.3	0.2	0.00771369	0.000488487
1000	1	0	0	0	0	0	0	0	25	0.8	0.3	0.2	0.00836026	0.000488169
1000	1	0	0	0	0	0	0	0	26	0.8	0.3	0.2	0.00903144	0.000487838
1000	1	0	0	0	0	0	0	0	27	0.8	0.3	0.2	0.00972704	0.000487496
1000	1	0	0	0	0	0	0	0	28	0.8	0.3	0.2	0.0104469	0.000487142
1000	1	0	0	0	0	0	0	0	29	0.8	0.3	0.2	0.0111907	0.000486775
1000	1	0	0	0	0	0	0	0	30	0.8	0.3	0.2	0.0119583	0.000486397
1000	1	0	0	0	0	0	0	0	0	0.8	0.4	0.2	0	0.000791332
1000	1	0	0	0	0	0	0	0	1	0.8	0.4	0.2	3.28864e-05	0.000791306
1000	1	0	0	0	0	0	0	0	2	0.8	0.4	0.2	0.000143759	0.000791218
1000	1	0	0	0	0	0	0	0	3	0.8	0.4	0.2	0.000332431	0.000791069
1000	1	0	0	0	0	0	0	0	4	0.8	0.4	0.2	0.000598655	0.000790858
1000	1	0	0	0	0	0	0	0	5	0.8	0.4	0.2	0.000942129	0.000790586
1000	1	0	0	0	0	0	0	0	6	0.8	0.4	0.2	0.00136249	0.000790254
1000	1	0	0	0	0	0	0	0	7	0.8	0.4	0.2	0.00185933	0.00078986
1000	1	0	0	0	0	0	0	0	8	0.8	0.4	0.2	0.00243217	0.000789407
1000	1	0	0	0	0	0	0	0	9	0.8	0.4	0.2	0.00308048	0.000788894
1000	1	0	0	0	0	0	0	0	10	0.8	0.4	0.2	0.00380369	0.000788322
1000	1	0	0	0	0	0	0	0	11	0.8	0.4	0.2	0.00460116	0.000787691
1000	1	0	0	0	0	0	0	0	12	0.8	0.4	0.2	0.00547221	0.000787001
1000	1	0	0	0	0	0	0	0	13	0.8	0.4	0.2	0.0064161	0.000786254
1000	1	0	0	0	0	0	0	0	14	0.8	0.4	0.2	0.00743206	0.00078545
1000	1	0	0	0	0	0	0	0	15	0.8	0.4	0.2	0.00851925	0.00078459
1000	1	0	0	0	0	0	0	0	16	0.8	0.4	0.2	0.0096768	0.000783674
1000	1	0	0	0	0	0	0	0	17	0.8	0.4	0.2	0.0109038	0.000782703
1000	1	0	0	0	0	0	0	0	18	0.8	0.4	0.2	0.0121993	0.000781678
1000	1	0	0	0	0	0	0	0	19	0.8	0.4	0.2	0.0135622	0.0007806
1000	1	0	0	0	0	0	0	0	20	0.8	0.4	0.2	0.0149917	0.000779468
1000	1	0	0	0	0	0	0	0	21	0.8	0.4	0.2	0.0164864	0.000778286
1000	1	0	0	0	0	0	0	0	22	0.8	0.4	0.2	0.0180455	0.000777052
1000	1	0	0	0	0	0	0	0	23	0.8	0.4	0.2	0.0196677	0.000775768
1000	1	0	0	0	0	0	0	0	24	0.8	0.4	0.2	0.0213518	0.000774435
1000	1	0	0	0	0	0	0	0	25	0.8	0.4	0.2	0.0230967	0.000773055
1000	1	0	0	0	0	0	0	0	26	0.8	0.4	0.2	0.0249011	0.000771627
1000	1	0	0	0	0	0	0	0	27	0.8	0.4	0.2	0.0267638	0.000770153
1000	1	0	0	0	0	0	0	0	28	0.8	0.4	0.2	0.0286835	0.000768634
1000	1	0	0	0	0	0	0	0	29	0.8	0.4	0.2	0.0306589	0.00076707
1000	1	0	0	0	0	0	0	0	30	0.8	0.4	0.2	0.0326887	0.000765464
1000	1	0	0	0	0	0	0	0	0	0.8	0.5	0.2	0	0.00120738
1000	1	0	0	0	0	0	0	0	1	0.8	0.5	0.2	9.73462e-05	0.00120726
1000	1	0	0	0	0	0	0	0	2	0.8	0.5	0.2	0.000413802	0.00120688
1000	1	0	0	0	0	0	0	0	3	0.8	0.5	0.2	0.000948446	0.00120623
1000	1	0	0	0	0	0	0	0	4	0.8	0.5	0.2	0.00169988	0.00120533
1000	1	0	0	0	0	0	0	0	5	0.8	0.5	0.2	0.00266621	0.00120416
1000	1	0	0	0	0	0	0	0	6	0.8	0.5	0.2	0.00384511	0.00120274
1000	1	0	0	0	0	0	0	0	7	0.8	0.5	0.2	0.00523378	0.00120106
1000	1	0	0	0	0	0	0	0	8	0.8	0.5	0.2	0.006829	0.00119913
1000	1	0	0	0	0	0	0	0	9	0.8	0.5	0.2	0.00862715	0.00119696
1000	1	0	0	0	0	0	0	0	10	0.8	0.5	0.2	0.0106242	0.00119455
1000	1	0	0	0	0	0	0	0	11	0.8	0.5	0.2	0.0128157	0.0011919
1000	1	0	0	0	0	0	0	0	12	0.8	0.5	0.2	0.015197	0.00118903
1000	1	0	0	0	0	0	0	0	13	0.8	0.5	0.2	0.017763	0.00118593
1000	1	0	0	0	0	0	0	0	14	0.8	0.5	0.2	0.0205084	0.00118262
1000	1	0	0	0	0	0	0	0	15	0.8	0.5	0.2	0.0234275	0.00117909
1000	1	0	0	0	0	0	0	0	16	0.8	0.5	0.2	0.0265147	0.00117536
1000	1	0	0	0	0	0	0	0	17	0.8	0.5	0.2	0.0297637	0.00117144
1000	1	0	0	0	0	0	0	0	18	0.8	0.5	0.2	0.0331684	0.00116733
1000	1	0	0	0	0	0	0	0	19	0.8	0.5	0.2	0.0367225	0.00116304
1000	1	0	0	0	0	0	0	0	20	0.8	0.5	0.2	0.0404196	0.00115858
1000	1	0	0	0	0	0	0	0	21	0.8	0.5	0.2	0.044253	0.00115395
1000	1	0	0	0	0	0	0	0	22	0.8	0.5	0.2	0.0482162	0.00114916
1000	1	0	0	0	0	0	0	0	23	0.8	0.5	0.2	0.0523025	0.00114423
1000	1	0	0	0	0	0	0	0	24	0.8	0.5	0.2	0.0565052	0.00113915
1000	1	0	0	0	0	0	0	0	25	0.8	0.5	0.2	0.0608179	0.00113395
1000	1	0	0	0	0	0	0	0	26	0.8	0.5	0.2	0.0652338	0.00112862
1000	1	0	0	0	0	0	0	0	27	0.8	0.5	0.2	0.0697464	0.00112317
1000	1	0	0	0	0	0	0	0	28	0.8	0.5	0.2	0.0743493	0.00111761
1000	1	0	0	0	0	0	0	0	29	0.8	0.5	0.2	0.0790361	0.00111195
1000	1	0	0	0	0	0	0	0	30	0.8	0.5	0.2	0.0838006	0.0011062
1000	1	0	0	0	0	0	0	0	0	0.8	0.6	0.2	0	0.00174946
1000	1	0	0	0	0	0	0	0	1	0.8	0.6	0.2	0.000284006	0.00174897
1000	1	0	0	0	0	0	0	0	2	0.8	0.6	0.2	0.00119072	0.00174738
1000	1	0	0	0	0	0	0	0	3	0.8	0.6	0.2	0.00271361	0.00174472
1000	1	0	0	0	0	0	0	0	4	0.8	0.6	0.2	0.00484217	0.00174099
1000	1	0	0	0	0	0	0	0	5	0.8	0.6	0.2	0.00756205	0.00173624
1000	1	0	0	0	0	0	0	0	6	0.8	0.6	0.2	0.0108554	0.00173047
1000	1	0	0	0	0	0	0	0	7	0.8	0.6	0.2	0.0147011	0.00172375
1000	1	0	0	0	0	0	0	0	8	0.8	0.6	0.2	0.0190753	0.00171609
1000	1	0	0	0	0	0	0	0	9	0.8	0.6	0.2	0.0239515	0.00170756
1000	1	0	0	0	0	0	0	0	10	0.8	0.6	0.2	0.0293013	0.0016982
1000	1	0	0	0	0	0	0	0	11	0.8	0.6	0.2	0.0350946	0.00168807
1000	1	0	0	0	0	0	0	0	12	0.8	0.6	0.2	0.0413001	0.00167721
1000	1	0	0	0	0	0	0	0	13	0.8	0.6	0.2	0.0478858	0.00166569
1000	1	0	0	0	0	0	0	0	14	0.8	0.6	0.2	0.0548193	0.00165356
1000	1	0	0	0	0	0	0	0	15	0.8	0.6	0.2	0.0620682	0.00164088
1000	1	0	0	0	0	0	0	0	16	0.8	0.6	0.2	0.0696002	0.0016277
1000	1	0	0	0	0	0	0	0	17	0.8	0.6	0.2	0.0773839	0.00161408
1000	1	0	0	0	0	0	0	0	18	0.8	0.6	0.2	0.0853885	0.00160008
1000	1	0	0	0	0	0	0	0	19	0.8	0.6	0.2	0.0935844	0.00158574
1000	1	0	0	0	0	0	0	0	20	0.8	0.6	0.2	0.101943	0.00157112
1000	1	0	0	0	0	0	0	0	21	0.8	0.6	0.2	0.110438	0.00155626
1000	1	0	0	0	0	0	0	0	22	0.8	0.6	0.2	0.119043	0.0015412
1000	1	0	0	0	0	0	0	0	23	0.8	0.6	0.2	0.127735	0.001526
1000	1	0	0	0	0	0	0	0	24	0.8	0.6	0.2	0.13649	0.00151068
1000	1	0	0	0	0	0	0	0	25	0.8	0.6	0.2	0.145288	0.00149529
1000	1	0	0	0	0	0	0	0	26	0.8	0.6	0.2	0.154111	0.00147985
1000	1	0	0	0	0	0	0	0	27	0.8	0.6	0.2	0.162939	0.00146441
1000	1	0	0	0	0	0	0	0	28	0.8	0.6	0.2	0.171758	0.00144898
1000	1	0	0	0	0	0	0	0	29	0.8	0.6	0.2	0.180552	0.00143359
1000	1	0	0	0	0	0	0	0	30	0.8	0.6	0.2	0.189308	0.00141828
1000	1	0	0	0	0	0	0	0	0	0.8	0.7	0.2	0	0.00217154
1000	1	0	0	0	0	0	0	0	1	0.8	0.7	0.2	0.000639894	0.00217015
1000	1	0	0	0	0	0	0	0	2	0.8	0.7	0.2	0.00267879	0.00216572
1000	1	0	0	0	0	0	0	0	3	0.8	0.7	0.2	0.00608319	0.00215833
1000	1	0	0	0	0	0	0	0	4	0.8	0.7	0.2	0.0107991	0.00214809
1000	1	0	0	0	0	0	0	0	5	0.8	0.7	0.2	0.0167544	0.00213515
1000	1	0	0	0	0	0	0	0	6	0.8	0.7	0.2	0.023862	0.00211972
1000	1	0	0	0	0	0	0	0	7	0.8	0.7	0.2	0.0320228	0.002102
1000	1	0	0	0	0	0	0	0	8	0.8	0.7	0.2	0.04113	0.00208222
1000	1	0	0	0	0	0	0	0	9	0.8	0.7	0.2	0.0510719	0.00206063
1000	1	0	0	0	0	0	0	0	10	0.8	0.7	0.2	0.0617358	0.00203747
1000	1	0	0	0	0	0	0	0	11	0.8	0.7	0.2	0.0730104	0.00201299
1000	1	0	0	0	0	0	0	0	12	0.8	0.7	0.2	0.0847882	0.00198742
1000	1	0	0	0	0	0	0	0	13	0.8	0.7	0.2	0.0969676	0.00196097
1000	1	0	0	0	0	0	0	0	14	0.8	0.7	0.2	0.109454	0.00193385
1000	1	0	0	0	0	0	0	0	15	0.8	0.7	0.2	0.122161	0.00190626
1000	1	0	0	0	0	0	0	0	16	0.8	0.7	0.2	0.13501	0.00187835
1000	1	0	0	0	0	0	0	0	17	0.8	0.7	0.2	0.147933	0.00185029
1000	1	0	0	0	0	0	0	0	18	0.8	0.7	0.2	0.160867	0.00182221
1000	1	0	0	0	0	0	0	0	19	0.8	0.7	0.2	0.173759	0.00179421
1000	1	0	0	0	0	0	0	0	20	0.8	0.7	0.2	0.186564	0.0017664
1000	1	0	0	0	0	0	0	0	21	0.8	0.7	0.2	0.199244	0.00173887
1000	1	0	0	0	0	0	0	0	22	0.8	0.7	0.2	0.211766	0.00171168
1000	1	0	0	0	0	0	0	0	23	0.8	0.7	0.2	0.224103	0.00168489
1000	1	0	0	0	0	0	0	0	24	0.8	0.7	0.2	0.236234	0.00165854
1000	1	0	0	0	0	0	0	0	25	0.8	0.7	0.2	0.248143	0.00163268
1000	1	0	0	0	0	0	0	0	26	0.8	0.7	0.2	0.259815	0.00160734
1000	1	0	0	0	0	0	0	0	27	0.8	0.7	0.2	0.271242	0.00158252
1000	1	0	0	0	0	0	0	0	28	0.8	0.7	0.2	0.282416	0.00155826
1000	1	0	0	0	0	0	0	0	29	0.8	0.7	0.2	0.293334	0.00153455
1000	1	0	0	0	0	0	0	0	30	0.8	0.7	0.2	0.303992	0.0015114
1000	1	0	0	0	0	0	0	0	0	0.8	0.8	0.2	0	0.00202855
1000	1	0	0	0	0	0	0	0	1	0.8	0.8	0.2	0.000720789	0.00202709
1000	1	0	0	0	0	0	0	0	2	0.8	0.8	0.2	0.00307853	0.0020223
1000	1	0	0	0	0	0	0	0	3	0.8	0.8	0.2	0.00702335	0.0020143
1000	1	0	0	0	0	0	0	0	4	0.8	0.8	0.2	0.0124752	0.00200324
1000	1	0	0	0	0	0	0	0	5	0.8	0.8	0.2	0.0193285	0.00198934
1000	1	0	0	0	0	0	0	0	6	0.8	0.8	0.2	0.0274577	0.00197285
1000	1	0	0	0	0	0	0	0	7	0.8	0.8	0.2	0.0367233	0.00195405
1000	1	0	0	0	0	0	0	0	8	0.8	0.8	0.2	0.0469784	0.00193325
1000	1	0	0	0	0	0	0	0	9	0.8	0.8	0.2	0.058074	0.00191074
1000	1	0	0	0	0	0	0	0	10	0.8	0.8	0.2	0.0698639	0.00188683
1000	1	0	0	0	0	0	0	0	11	0.8	0.8	0.2	0.0822088	0.00186178
1000	1	0	0	0	0	0	0	0	12	0.8	0.8	0.2	0.0949789	0.00183588
1000	1	0	0	0	0	0	0	0	13	0.8	0.8	0.2	0.108056	0.00180935
1000	1	0	0	0	0	0	0	0	14	0.8	0.8	0.2	0.121333	0.00178242
1000	1	0	0	0	0	0	0	0	15	0.8	0.8	0.2	0.134719	0.00175526
1000	1	0	0	0	0	0	0	0	16	0.8	0.8	0.2	0.148131	0.00172806
1000	1	0	0	0	0	0	0	0	17	0.8	0.8	0.2	0.161502	0.00170093
1000	1	0	0	0	0	0	0	0	18	0.8	0.8	0.2	0.174774	0.00167401
1000	1	0	0	0	0	0	0	0	19	0.8	0.8	0.2	0.187898	0.00164739
1000	1	0	0	0	0	0	0	0	20	0.8	0.8	0.2	0.200837	0.00162114
1000	1	0	0	0	0	0	0	0	21	0.8	0.8	0.2	0.213559	0.00159533
1000	1	0	0	0	0	0	0	0	22	0.8	0.8	0.2	0.226041	0.00157001
1000	1	0	0	0	0	0	0	0	23	0.8	0.8	0.2	0.238263	0.00154522
1000	1	0	0	0	0	0	0	0	24	0.8	0.8	0.2	0.250213	0.00152098
1000	1	0	0	0	0	0	0	0	25	0.8	0.8	0.2	0.261882	0.00149731
1000	1	0	0	0	0	0	0	0	26	0.8	0.8	0.2	0.273264	0.00147422
1000	1	0	0	0	0	0	0	0	27	0.8	0.8	0.2	0.284356	0.00145172
1000	1	0	0	0	0	0	0	0	28	0.8	0.8	0.2	0.295158	0.0014298
1000	1	0	0	0	0	0	0	0	29	0.8	0.8	0.2	0.305672	0.00140847
1000	1	0	0	0	0	0	0	0	30	0.8	0.8	0.2	0.315901	0.00138772
1000	1	0	0	0	0	0	0	0	0	0.8	0.9	0.2	0	0.00165926
1000	1	0	0	0	0	0	0	0	1	0.8	0.9	0.2	0.000528485	0.00165839
1000	1	0	0	0	0	0	0	0	2	0.8	0.9	0.2	0.00234601	0.00165537
1000	1	0	0	0	0	0	0	0	3	0.8	0.9	0.2	0.0054175	0.00165027
1000	1	0	0	0	0	0	0	0	4	0.8	0.9	0.2	0.00968637	0.00164319
1000	1	0	0	0	0	0	0	0	5	0.8	0.9	0.2	0.0150776	0.00163425
1000	1	0	0	0	0	0	0	0	6	0.8	0.9	0.2	0.0215013	0.00162359
1000	1	0	0	0	0	0	0	0	7	0.8	0.9	0.2	0.0288572	0.00161138
1000	1	0	0	0	0	0	0	0	8	0.8	0.9	0.2	0.0370384	0.00159781
1000	1	0	0	0	0	0	0	0	9	0.8	0.9	0.2	0.0459358	0.00158304
1000	1	0	0	0	0	0	0	0	10	0.8	0.9	0.2	0.0554411	0.00156727
1000	1	0	0	0	0	0	0	0	11	0.8	0.9	0.2	0.0654497	0.00155066
1000	1	0	0	0	0	0	0	0	12	0.8	0.9	0.2	0.0758629	0.00153339
1000	1	0	0	0	0	0	0	0	13	0.8	0.9	0.2	0.0865895	0.00151559
1000	1	0	0	0	0	0	0	0	14	0.8	0.9	0.2	0.0975466	0.00149741
1000	1	0	0	0	0	0	0	0	15	0.8	0.9	0.2	0.10866	0.00147897
1000	1	0	0	0	0	0	0	0	16	0.8	0.9	0.2	0.119864	0.00146038
1000	1	0	0	0	0	0	0	0	17	0.8	0.9	0.2	0.131101	0.00144173
1000	1	0	0	0	0	0	0	0	18	0.8	0.9	0.2	0.142322	0.00142311
1000	1	0	0	0	0	0	0	0	19	0.8	0.9	0.2	0.153487	0.00140459
1000	1	0	0	0	0	0	0	0	20	0.8	0.9	0.2	0.164559	0.00138622
1000	1	0	0	0	0	0	0	0	21	0.8	0.9	0.2	0.17551	0.00136805
1000	1	0	0	0	0	0	0	0	22	0.8	0.9	0.2	0.186315	0.00135012
1000	1	0	0	0	0	0	0	0	23	0.8	0.9	0.2	0.196957	0.00133246
1000	1	0	0	0	0	0	0	0	24	0.8	0.9	0.2	0.20742	0.0013151
1000	1	0	0	0	0	0	0	0	25	0.8	0.9	0.2	0.217692	0.00129805
1000	1	0	0	0	0	0	0	0	26	0.8	0.9	0.2	0.227765	0.00128134
1000	1	0	0	0	0	0	0	0	27	0.8	0.9	0.2	0.237632	0.00126497
1000	1	0	0	0	0	0	0	0	28	0.8	0.9	0.2	0.247291	0.00124894
1000	1	0	0	0	0	0	0	0	29	0.8	0.9	0.2	0.256739	0.00123326
1000	1	0	0	0	0	0	0	0	30	0.8	0.9	0.2	0.265975	0.00121794
1000	1	0	0	0	0	0	0	0	0	0.2	0.3	0.4	0	0.000630453
1000	1	0	0	0	0	0	0	0	1	0.2	0.3	0.4	7.10847e-05	0.000630409
1000	1	0	0	0	0	0	0	0	2	0.2	0.3	0.4	0.00029791	0.000630266
1000	1	0	0	0	0	0	0	0	3	0.2	0.3	0.4	0.00067982	0.000630025
1000	1	0	0	0	0	0	0	0	4	0.2	0.3	0.4	0.00121593	0.000629687
1000	1	0	0	0	0	0	0	0	5	0.2	0.3	0.4	0.00190515	0.000629252
1000	1	0	0	0	0	0	0	0	6	0.2	0.3	0.4	0.00274614	0.000628722
1000	1	0	0	0	0	0	0	0	7	0.2	0.3	0.4	0.00373738	0.000628097
1000	1	0	0	0	0	0	0	0	8	0.2	0.3	0.4	0.00487712	0.000627379
1000	1	0	0	0	0	0	0	0	9	0.2	0.3	0.4	0.00616344	0.000626568
1000	1	0	0	0	0	0	0	0	10	0.2	0.3	0.4	0.00759419	0.000625666
1000	1	0	0	0	0	0	0	0	11	0.2	0.3	0.4	0.00916705	0.000624674
1000	1	0	0	0	0	0	0	0	12	0.2	0.3	0.4	0.0108795	0.000623594
1000	1	0	0	0	0	0	0	0	13	0.2	0.3	0.4	0.012729	0.000622428
1000	1	0	0	0	0	0	0	0	14	0.2	0.3	0.4	0.0147126	0.000621178
1000	1	0	0	0	0	0	0	0	15	0.2	0.3	0.4	0.0168274	0.000619844
1000	1	0	0	0	0	0	0	0	16	0.2	0.3	0.4	0.0190703	0.00061843
1000	1	0	0	0	0	0	0	0	17	0.2	0.3	0.4	0.0214381	0.000616938
1000	1	0	0	0	0	0	0	0	18	0.2	0.3	0.4	0.0239274	0.000615368
1000	1	0	0	0	0	0	0	0	19	0.2	0.3	0.4	0.0265348	0.000613724
1000	1	0	0	0	0	0	0	0	20	0.2	0.3	0.4	0.0292568	0.000612008
1000	1	0	0	0	0	0	0	0	21	0.2	0.3	0.4	0.0320897	0.000610222
1000	1	0	0	0	0	0	0	0	22	0.2	0.3	0.4	0.0350299	0.000608369
1000	1	0	0	0	0	0	0	0	23	0.2	0.3	0.4	0.0380736	0.00060645
1000	1	0	0	0	0	0	0	0	24	0.2	0.3	0.4	0.0412171	0.000604468
1000	1	0	0	0	0	0	0	0	25	0.2	0.3	0.4	0.0444565	0.000602426
1000	1	0	0	0	0	0	0	0	26	0.2	0.3	0.4	0.0477879	0.000600325
1000	1	0	0	0	0	0	0	0	27	0.2	0.3	0.4	0.0512076	0.000598169
1000	1	0	0	0	0	0	0	0	28	0.2	0.3	0.4	0.0547116	0.00059596
1000	1	0	0	0	0	0	0	0	29	0.2	0.3	0.4	0.0582961	0.0005937
1000	1	0	0	0	0	0	0	0	30	0.2	0.3	0.4	0.0619572	0.000591392
1000	1	0	0	0	0	0	0	0	0	0.2	0.4	0.4	0	0.00101393
1000	1	0	0	0	0	0	0	0	1	0.2	0.4	0.4	0.000206181	0.00101372
1000	1	0	0	0	0	0	0	0	2	0.2	0.4	0.4	0.000848514	0.00101307
1000	1	0	0	0	0	0	0	0	3	0.2	0.4	0.4	0.00192363	0.00101198
1000	1	0	0	0	0	0	0	0	4	0.2	0.4	0.4	0.00342632	0.00101046
1000	1	0	0	0	0	0	0	0	5	0.2	0.4	0.4	0.0053496	0.00100851
1000	1	0	0	0	0	0	0	0	6	0.2	0.4	0.4	0.00768479	0.00100614
1000	1	0	0	0	0	0	0	0	7	0.2	0.4	0.4	0.0104216	0.00100337
1000	1	0	0	0	0	0	0	0	8	0.2	0.4	0.4	0.0135483	0.0010002
1000	1	0	0	0	0	0	0	0	9	0.2	0.4	0.4	0.0170517	0.000996643
1000	1	0	0	0	0	0	0	0	10	0.2	0.4	0.4	0.0209175	0.000992724
1000	1	0	0	0	0	0	0	0	11	0.2	0.4	0.4	0.0251305	0.000988452
1000	1	0	0	0	0	0	0	0	12	0.2	0.4	0.4	0.0296742	0.000983845
1000	1	0	0	0	0	0	0	0	13	0.2	0.4	0.4	0.0345316	0.00097892
1000	1	0	0	0	0	0	0	0	14	0.2	0.4	0.4	0.0396852	0.000973694
1000	1	0	0	0	0	0	0	0	15	0.2	0.4	0.4	0.0451169	0.000968187
1000	1	0	0	0	0	0	0	0	16	0.2	0.4	0.4	0.0508084	0.000962416
1000	1	0	0	0	0	0	0	0	17	0.2	0.4	0.4	0.0567411	0.000956401
1000	1	0	0	0	0	0	0	0	18	0.2	0.4	0.4	0.0628966	0.000950159
1000	1	0	0	0	0	0	0	0	19	0.2	0.4	0.4	0.0692565	0.000943711
1000	1	0	0	0	0	0	0	0	20	0.2	0.4	0.4	0.0758026	0.000937074
1000	1	0	0	0	0	0	0	0	21	0.2	0.4	0.4	0.0825172	0.000930265
1000	1	0	0	0	0	0	0	0	22	0.2	0.4	0.4	0.0893827	0.000923304
1000	1	0	0	0	0	0	0	0	23	0.2	0.4	0.4	0.0963822	0.000916207
1000	1	0	0	0	0	0	0	0	24	0.2	0.4	0.4	0.103499	0.000908991
1000	1	0	0	0	0	0	0	0	25	0.2	0.4	0.4	0.110719	0.000901671
1000	1	0	0	0	0	0	0	0	26	0.2	0.4	0.4	0.118025	0.000894263
1000	1	0	0	0	0	0	0	0	27	0.2	0.4	0.4	0.125403	0.000886782
1000	1	0	0	0	0	0	0	0	28	0.2	0.4	0.4	0.13284	0.000879241
1000	1	0	0	0	0	0	0	0	29	0.2	0.4	0.4	0.140323	0.000871654
1000	1	0	0	0	0	0	0	0	30	0.2	0.4	0.4	0.14784	0.000864032
1000	1	0	0	0	0	0	0	0	0	0.2	0.5	0.4	0	0.00159121
1000	1	0	0	0	0	0	0	0	1	0.2	0.5	0.4	0.000654112	0.00159017
1000	1	0	0	0	0	0	0	0	2	0.2	0.5	0.4	0.0026641	0.00158697
1000	1	0	0	0	0	0	0	0	3	0.2	0.5	0.4	0.00600077	0.00158166
1000	1	0	0	0	0	0	0	0	4	0.2	0.5	0.4	0.0106174	0.00157432
1000	1	0	0	0	0	0	0	0	5	0.2	0.5	0.4	0.0164515	0.00156503
1000	1	0	0	0	0	0	0	0	6	0.2	0.5	0.4	0.023427	0.00155394
1000	1	0	0	0	0	0	0	0	7	0.2	0.5	0.4	0.031457	0.00154116
1000	1	0	0	0	0	0	0	0	8	0.2	0.5	0.4	0.0404465	0.00152685
1000	1	0	0	0	0	0	0	0	9	0.2	0.5	0.4	0.0502951	0.00151118
1000	1	0	0	0	0	0	0	0	10	0.2	0.5	0.4	0.0608998	0.00149431
1000	1	0	0	0	0	0	0	0	11	0.2	0.5	0.4	0.0721575	0.00147639
1000	1	0	0	0	0	0	0	0	12	0.2	0.5	0.4	0.083967	0.0014576
1000	1	0	0	0	0	0	0	0	13	0.2	0.5	0.4	0.096231	0.00143809
1000	1	0	0	0	0	0	0	0	14	0.2	0.5	0.4	0.108857	0.001418
1000	1	0	0	0	0	0	0	0	15	0.2	0.5	0.4	0.12176	0.00139747
1000	1	0	0	0	0	0	0	0	16	0.2	0.5	0.4	0.134859	0.00137662
1000	1	0	0	0	0	0	0	0	17	0.2	0.5	0.4	0.148084	0.00135558
1000	1	0	0	0	0	0	0	0	18	0.2	0.5	0.4	0.161369	0.00133444
1000	1	0	0	0	0	0	0	0	19	0.2	0.5	0.4	0.174657	0.00131329
1000	1	0	0	0	0	0	0	0	20	0.2	0.5	0.4	0.187899	0.00129222
1000	1	0	0	0	0	0	0	0	21	0.2	0.5	0.4	0.201051	0.0012713
1000	1	0	0	0	0	0	0	0	22	0.2	0.5	0.4	0.214076	0.00125057
1000	1	0	0	0	0	0	0	0	23	0.2	0.5	0.4	0.226941	0.0012301
1000	1	0	0	0	0	0	0	0	24	0.2	0.5	0.4	0.239622	0.00120992
1000	1	0	0	0	0	0	0	0	25	0.2	0.5	0.4	0.252096	0.00119007
1000	1	0	0	0	0	0	0	0	26	0.2	0.5	0.4	0.264346	0.00117058
1000	1	0	0	0	0	0	0	0	27	0.2	0.5	0.4	0.276358	0.00115147
1000	1	0	0	0	0	0	0	0	28	0.2	0.5	0.4	0.288123	0.00113275
1000	1	0	0	0	0	0	0	0	29	0.2	0.5	0.4	0.299632	0.00111443
1000	1	0	0	0	0	0	0	0	30	0.2	0.5	0.4	0.310881	0.00109653
1000	1	0	0	0	0	0	0	0	0	0.2	0.6	0.4	0	0.00220803
1000	1	0	0	0	0	0	0	0	1	0.2	0.6	0.4	0.00185864	0.00220392
1000	1	0	0	0	0	0	0	0	2	0.2	0.6	0.4	0.00750764	0.00219145
1000	1	0	0	0	0	0	0	0	3	0.2	0.6	0.4	0.0167154	0.00217112
1000	1	0	0	0	0	0	0	0	4	0.2	0.6	0.4	0.0291255	0.00214372
1000	1	0	0	0	0	0	0	0	5	0.2	0.6	0.4	0.0442932	0.00211022
1000	1	0	0	0	0	0	0	0	6	0.2	0.6	0.4	0.0617263	0.00207173
1000	1	0	0	0	0	0	0	0	7	0.2	0.6	0.4	0.0809232	0.00202934
1000	1	0	0	0	0	0	0	0	8	0.2	0.6	0.4	0.101404	0.00198412
1000	1	0	0	0	0	0	0	0	9	0.2	0.6	0.4	0.122734	0.00193702
1000	1	0	0	0	0	0	0	0	10	0.2	0.6	0.4	0.144532	0.00188889
1000	1	0	0	0	0	0	0	0	11	0.2	0.6	0.4	0.16648	0.00184043
1000	1	0	0	0	0	0	0	0	12	0.2	0.6	0.4	0.188321	0.00179221
1000	1	0	0	0	0	0	0	0	13	0.2	0.6	0.4	0.209853	0.00174466
1000	1	0	0	0	0	0	0	0	14	0.2	0.6	0.4	0.230924	0.00169814
1000	1	0	0	0	0	0	0	0	15	0.2	0.6	0.4	0.251422	0.00165288
1000	1	0	0	0	0	0	0	0	16	0.2	0.6	0.4	0.271272	0.00160905
1000	1	0	0	0	0	0	0	0	17	0.2	0.6	0.4	0.290425	0.00156676
1000	1	0	0	0	0	0	0	0	18	0.2	0.6	0.4	0.308853	0.00152607
1000	1	0	0	0	0	0	0	0	19	0.2	0.6	0.4	0.326548	0.001487
1000	1	0	0	0	0	0	0	0	20	0.2	0.6	0.4	0.343511	0.00144954
1000	1	0	0	0	0	0	0	0	21	0.2	0.6	0.4	0.359755	0.00141367
1000	1	0	0	0	0	0	0	0	22	0.2	0.6	0.4	0.375298	0.00137935
1000	1	0	0	0	0	0	0	0	23	0.2	0.6	0.4	0.390162	0.00134653
1000	1	0	0	0	0	0	0	0	24	0.2	0.6	0.4	0.404375	0.00131515
1000	1	0	0	0	0	0	0	0	25	0.2	0.6	0.4	0.417964	0.00128515
1000	1	0	0	0	0	0	0	0	26	0.2	0.6	0.4	0.430957	0.00125646
1000	1	0	0	0	0	0	0	0	27	0.2	0.6	0.4	0.443384	0.00122902
1000	1	0	0	0	0	0	0	0	28	0.2	0.6	0.4	0.455272	0.00120277
1000	1	0	0	0	0	0	0	0	29	0.2	0.6	0.4	0.466651	0.00117764
1000	1	0	0	0	0	0	0	0	30	0.2	0.6	0.4	0.477545	0.00115359
1000	1	0	0	0	0	0	0	0	0	0.2	0.7	0.4	0	0.00208123
1000	1	0	0	0	0	0	0	0	1	0.2	0.7	0.4	0.00232176	0.0020764
1000	1	0	0	0	0	0	0	0	2	0.2	0.7	0.4	0.00942607	0.00206161
1000	1	0	0	0	0	0	0	0	3	0.2	0.7	0.4	0.0209052	0.00203772
1000	1	0	0	0	0	0	0	0	4	0.2	0.7	0.4	0.0361509	0.00200599
1000	1	0	0	0	0	0	0	0	5	0.2	0.7	0.4	0.0544396	0.00196793
1000	1	0	0	0	0	0	0	0	6	0.2	0.7	0.4	0.0750181	0.0019251
1000	1	0	0	0	0	0	0	0	7	0.2	0.7	0.4	0.0971716	0.00187899
1000	1	0	0	0	0	0	0	0	8	0.2	0.7	0.4	0.120269	0.00183092
1000	1	0	0	0	0	0	0	0	9	0.2	0.7	0.4	0.143784	0.00178198
1000	1	0	0	0	0	0	0	0	10	0.2	0.7	0.4	0.167301	0.00173303
1000	1	0	0	0	0	0	0	0	11	0.2	0.7	0.4	0.190504	0.00168474
1000	1	0	0	0	0	0	0	0	12	0.2	0.7	0.4	0.213164	0.00163758
1000	1	0	0	0	0	0	0	0	13	0.2	0.7	0.4	0.235124	0.00159188
1000	1	0	0	0	0	0	0	0	14	0.2	0.7	0.4	0.256286	0.00154784
1000	1	0	0	0	0	0	0	0	15	0.2	0.7	0.4	0.276591	0.00150558
1000	1	0	0	0	0	0	0	0	16	0.2	0.7	0.4	0.296015	0.00146515
1000	1	0	0	0	0	0	0	0	17	0.2	0.7	0.4	0.314556	0.00142656
1000	1	0	0	0	0	0	0	0	18	0.2	0.7	0.4	0.332229	0.00138978
1000	1	0	0	0	0	0	0	0	19	0.2	0.7	0.4	0.349059	0.00135475
1000	1	0	0	0	0	0	0	0	20	0.2	0.7	0.4	0.365079	0.00132141
1000	1	0	0	0	0	0	0	0	21	0.2	0.7	0.4	0.380324	0.00128968
1000	1	0	0	0	0	0	0	0	22	0.2	0.7	0.4	0.394834	0.00125948
1000	1	0	0	0	0	0	0	0	23	0.2	0.7	0.4	0.408648	0.00123073
1000	1	0	0	0	0	0	0	0	24	0.2	0.7	0.4	0.421806	0.00120335
1000	1	0	0	0	0	0	0	0	25	0.2	0.7	0.4	0.434345	0.00117725
1000	1	0	0	0	0	0	0	0	26	0.2	0.7	0.4	0.446302	0.00115237
1000	1	0	0	0	0	0	0	0	27	0.2	0.7	0.4	0.457712	0.00112862
1000	1	0	0	0	0	0	0	0	28	0.2	0.7	0.4	0.468608	0.00110594
1000	1	0	0	0	0	0	0	0	29	0.2	0.7	0.4	0.479021	0.00108427
1000	1	0	0	0	0	0	0	0	30	0.2	0.7	0.4	0.48898	0.00106355
1000	1	0	0	0	0	0	0	0	0	0.2	0.8	0.4	0	0.00158859
1000	1	0	0	0	0	0	0	0	1	0.2	0.8	0.4	0.00158196	0.00158608
1000	1	0	0	0	0	0	0	0	2	0.2	0.8	0.4	0.00656118	0.00157817
1000	1	0	0	0	0	0	0	0	3	0.2	0.8	0.4	0.0146927	0.00156525
1000	1	0	0	0	0	0	0	0	4	0.2	0.8	0.4	0.0256063	0.00154791
1000	1	0	0	0	0	0	0	0	5	0.2	0.8	0.4	0.0388529	0.00152687
1000	1	0	0	0	0	0	0	0	6	0.2	0.8	0.4	0.0539541	0.00150288
1000	1	0	0	0	0	0	0	0	7	0.2	0.8	0.4	0.0704421	0.00147669
1000	1	0	0	0	0	0	0	0	8	0.2	0.8	0.4	0.0878895	0.00144897
1000	1	0	0	0	0	0	0	0	9	0.2	0.8	0.4	0.105925	0.00142032
1000	1	0	0	0	0	0	0	0	10	0.2	0.8	0.4	0.124241	0.00139122
1000	1	0	0	0	0	0	0	0	11	0.2	0.8	0.4	0.142591	0.00136207
1000	1	0	0	0	0	0	0	0	12	0.2	0.8	0.4	0.160783	0.00133317
1000	1	0	0	0	0	0	0	0	13	0.2	0.8	0.4	0.178673	0.00130475
1000	1	0	0	0	0	0	0	0	14	0.2	0.8	0.4	0.196158	0.00127698
1000	1	0	0	0	0	0	0	0	15	0.2	0.8	0.4	0.213167	0.00124996
1000	1	0	0	0	0	0	0	0	16	0.2	0.8	0.4	0.229653	0.00122377
1000	1	0	0	0	0	0	0	0	17	0.2	0.8	0.4	0.245589	0.00119845
1000	1	0	0	0	0	0	0	0	18	0.2	0.8	0.4	0.260962	0.00117403
1000	1	0	0	0	0	0	0	0	19	0.2	0.8	0.4	0.27577	0.0011505
1000	1	0	0	0	0	0	0	0	20	0.2	0.8	0.4	0.290021	0.00112787
1000	1	0	0	0	0	0	0	0	21	0.2	0.8	0.4	0.303725	0.0011061
1000	1	0	0	0	0	0	0	0	22	0.2	0.8	0.4	0.316899	0.00108517
1000	1	0	0	0	0	0	0	0	23	0.2	0.8	0.4	0.329561	0.00106505
1000	1	0	0	0	0	0	0	0	24	0.2	0.8	0.4	0.34173	0.00104572
1000	1	0	0	0	0	0	0	0	25	0.2	0.8	0.4	0.353428	0.00102714
1000	1	0	0	0	0	0	0	0	26	0.2	0.8	0.4	0.364675	0.00100927
1000	1	0	0	0	0	0	0	0	27	0.2	0.8	0.4	0.375493	0.000992086
1000	1	0	0	0	0	0	0	0	28	0.2	0.8	0.4	0.385901	0.000975552
1000	1	0	0	0	0	0	0	0	29	0.2	0.8	0.4	0.39592	0.000959636
1000	1	0	0	0	0	0	0	0	30	0.2	0.8	0.4	0.405568	0.000944309
1000	1	0	0	0	0	0	0	0	0	0.2	0.9	0.4	0	0.00125841
1000	1	0	0	0	0	0	0	0	1	0.2	0.9	0.4	0.00105833	0.00125708
1000	1	0	0	0	0	0	0	0	2	0.2	0.9	0.4	0.00448939	0.00125276
1000	1	0	0	0	0	0	0	0	3	0.2	0.9	0.4	0.0101495	0.00124564
1000	1	0	0	0	0	0	0	0	4	0.2	0.9	0.4	0.0178191	0.00123599
1000	1	0	0	0	0	0	0	0	5	0.2	0.9	0.4	0.0272274	0.00122415
1000	1	0	0	0	0	0	0	0	6	0.2	0.9	0.4	0.0380798	0.00121049
1000	1	0	0	0	0	0	0	0	7	0.2	0.9	0.4	0.0500811	0.00119539
1000	1	0	0	0	0	0	0	0	8	0.2	0.9	0.4	0.0629529	0.00117919
1000	1	0	0	0	0	0	0	0	9	0.2	0.9	0.4	0.0764454	0.00116221
1000	1	0	0	0	0	0	0	0	10	0.2	0.9	0.4	0.0903424	0.00114472
1000	1	0	0	0	0	0	0	0	11	0.2	0.9	0.4	0.104463	0.00112695
1000	1	0	0	0	0	0	0	0	12	0.2	0.9	0.4	0.118659	0.00110909
1000	1	0	0	0	0	0	0	0	13	0.2	0.9	0.4	0.132812	0.00109128
1000	1	0	0	0	0	0	0	0	14	0.2	0.9	0.4	0.14683	0.00107364
1000	1	0	0	0	0	0	0	0	15	0.2	0.9	0.4	0.160644	0.00105625
1000	1	0	0	0	0	0	0	0	16	0.2	0.9	0.4	0.174202	0.00103919
1000	1	0	0	0	0	0	0	0	17	0.2	0.9	0.4	0.187464	0.0010225
1000	1	0	0	0	0	0	0	0	18	0.2	0.9	0.4	0.200407	0.00100622
1000	1	0	0	0	0	0	0	0	19	0.2	0.9	0.4	0.213012	0.000990353
1000	1	0	0	0	0	0	0	0	20	0.2	0.9	0.4	0.225272	0.000974926
1000	1	0	0	0	0	0	0	0	21	0.2	0.9	0.4	0.237181	0.000959939
1000	1	0	0	0	0	0	0	0	22	0.2	0.9	0.4	0.24874	0.000945393
1000	1	0	0	0	0	0	0	0	23	0.2	0.9	0.4	0.259952	0.000931283
1000	1	0	0	0	0	0	0	0	24	0.2	0.9	0.4	0.270825	0.000917601
1000	1	0	0	0	0	0	0	0	25	0.2	0.9	0.4	0.281364	0.000904338
1000	1	0	0	0	0	0	0	0	26	0.2	0.9	0.4	0.29158	0.000891483
1000	1	0	0	0	0	0	0	0	27	0.2	0.9	0.4	0.301481	0.000879023
1000	1	0	0	0	0	0	0	0	28	0.2	0.9	0.4	0.311078	0.000866946
1000	1	0	0	0	0	0	0	0	29	0.2	0.9	0.4	0.320382	0.000855238
1000	1	0	0	0	0	0	0	0	30	0.2	0.9	0.4	0.329403	0.000843886
1000	1	0	0	0	0	0	0	0	0	0.4	0.3	0.4	0	0.000518162
1000	1	0	0	0	0	0	0	0	1	0.4	0.3	0.4	3.68359e-05	0.000518143
1000	1	0	0	0	0	0	0	0	2	0.4	0.3	0.4	0.000161034	0.000518079
1000	1	0	0	0	0	0	0	0	3	0.4	0.3	0.4	0.000372313	0.00051797
1000	1	0	0	0	0	0	0	0	4	0.4	0.3	0.4	0.000670322	0.000517815
1000	1	0	0	0	0	0	0	0	5	0.4	0.3	0.4	0.00105464	0.000517616
1000	1	0	0	0	0	0	0	0	6	0.4	0.3	0.4	0.00152479	0.000517372
1000	1	0	0	0	0	0	0	0	7	0.4	0.3	0.4	0.00208022	0.000517084
1000	1	0	0	0	0	0	0	0	8	0.4	0.3	0.4	0.0027203	0.000516753
1000	1	0	0	0	0	0	0	0	9	0.4	0.3	0.4	0.00344436	0.000516378
1000	1	0	0	0	0	0	0	0	10	0.4	0.3	0.4	0.00425166	0.000515959
1000	1	0	0	0	0	0	0	0	11	0.4	0.3	0.4	0.00514138	0.000515498
1000	1	0	0	0	0	0	0	0	12	0.4	0.3	0.4	0.00611267	0.000514995
1000	1	0	0	0	0	0	0	0	13	0.4	0.3	0.4	0.0071646	0.00051445
1000	1	0	0	0	0	0	0	0	14	0.4	0.3	0.4	0.00829619	0.000513864
1000	1	0	0	0	0	0	0	0	15	0.4	0.3	0.4	0.00950642	0.000513236
1000	1	0	0	0	0	0	0	0	16	0.4	0.3	0.4	0.0107942	0.000512569
1000	1	0	0	0	0	0	0	0	17	0.4	0.3	0.4	0.0121584	0.000511862
1000	1	0	0	0	0	0	0	0	18	0.4	0.3	0.4	0.0135978	0.000511116
1000	1	0	0	0	0	0	0	0	19	0.4	0.3	0.4	0.0151112	0.000510332
1000	1	0	0	0	0	0	0	0	20	0.4	0.3	0.4	0.0166973	0.00050951
1000	1	0	0	0	0	0	0	0	21	0.4	0.3	0.4	0.0183549	0.000508652
1000	1	0	0	0	0	0	0	0	22	0.4	0.3	0.4	0.0200825	0.000507756
1000	1	0	0	0	0	0	0	0	23	0.4	0.3	0.4	0.0218789	0.000506825
1000	1	0	0	0	0	0	0	0	24	0.4	0.3	0.4	0.0237425	0.00050586
1000	1	0	0	0	0	0	0	0	25	0.4	0.3	0.4	0.0256719	0.00050486
1000	1	0	0	0	0	0	0	0	26	0.4	0.3	0.4	0.0276657	0.000503827
1000	1	0	0	0	0	0	0	0	27	0.4	0.3	0.4	0.0297223	0.000502761
1000	1	0	0	0	0	0	0	0	28	0.4	0.3	0.4	0.0318403	0.000501664
1000	1	0	0	0	0	0	0	0	29	0.4	0.3	0.4	0.034018	0.000500535
1000	1	0	0	0	0	0	0	0	30	0.4	0.3	0.4	0.036254	0.000499377
1000	1	0	0	0	0	0	0	0	0	0.4	0.4	0.4	0	0.000825088
1000	1	0	0	0	0	0	0	0	1	0.4	0.4	0.4	0.00010734	0.000825
1000	1	0	0	0	0	0	0	0	2	0.4	0.4	0.4	0.000453237	0.000824714
1000	1	0	0	0	0	0	0	0	3	0.4	0.4	0.4	0.00103655	0.000824233
1000	1	0	0	0	0	0	0	0	4	0.4	0.4	0.4	0.00185559	0.000823557
1000	1	0	0	0	0	0	0	0	5	0.4	0.4	0.4	0.00290812	0.000822689
1000	1	0	0	0	0	0	0	0	6	0.4	0.4	0.4	0.00419137	0.00082163
1000	1	0	0	0	0	0	0	0	7	0.4	0.4	0.4	0.00570207	0.000820384
1000	1	0	0	0	0	0	0	0	8	0.4	0.4	0.4	0.00743645	0.000818953
1000	1	0	0	0	0	0	0	0	9	0.4	0.4	0.4	0.00939028	0.000817341
1000	1	0	0	0	0	0	0	0	10	0.4	0.4	0.4	0.0115589	0.000815551
1000	1	0	0	0	0	0	0	0	11	0.4	0.4	0.4	0.0139372	0.000813589
1000	1	0	0	0	0	0	0	0	12	0.4	0.4	0.4	0.0165197	0.000811458
1000	1	0	0	0	0	0	0	0	13	0.4	0.4	0.4	0.0193006	0.000809163
1000	1	0	0	0	0	0	0	0	14	0.4	0.4	0.4	0.0222738	0.00080671
[truncated: 32,318 more rows]
