# Supplementary material for: Interactive human–machine learning framework for modelling of ferroelectric–dielectric composites
Source: Royal Society of Chemistry journal article supplement (doi:10.1039/c9tc06073a), 2020-01-01
Supplement: c9tc06073a3.xlsx [file c9tc06073a3.xlsx]

## Sheet: tunable_BST_dataset
Material	Film or Ceramic	x	Sintering Temperature (C)	Frequency	Temperature (C)	Emax (kV/cm)	Tc	Permittivity at Tc	Permittivity at RT	Grain Size	Tunability %	Tand	References
0.7Ba0.4Sr0.6TiO3-0.3MgAl2O4	ceramic	0.4	1500/4h	10k	20	30	-47		567		22.6	0.0014	2
0.8Ba0.4Sr0.6TiO3-0.2MgAl2O4	ceramic	0.4	1500/4h	10k	20	30	-51		746		16.5	0.0009	2
0.9Ba0.4Sr0.6TiO3-0.1MgAl2O4	ceramic	0.4	1500/4h	10k	20	30	-62		812		10	0.0008	2
0.95Ba0.4Sr0.6TiO3-0.05MgAl2O4	ceramic	0.4	1500/4h	10k	20	30	-68		910		8.2	0.0009	2
Ba0.4Sr0.6TiO3	ceramic	0.4	1400/4h	10k	20	30	-62		1136		18.8	0.0008	2
Ba0.6Sr0.4TiO3	ceramic	0.6	1200	10k	RT	20				0.6um	31.2	0.0022	3
Ba0.6Sr0.4TiO3	ceramic	0.6	1230	10k	RT	20	0		~5900	0.8um	31.2	0.0022	3
Ba0.6Sr0.4TiO3	ceramic	0.6	1250	10k	RT	20	0		~5900	1.5um	31.2	0.0022	3
Ba0.6Sr0.4TiO3	ceramic	0.6	1280	10k	RT	20				2.3um	31.2	0.0022	3
Ba0.5Sr0.5TiO3	ceramic	0.5		10k	15	20	~(-37)	~17500			19.4	0.0017	4
Ba0.65Sr0.35TiO3	ceramic	0.65		10k	RT	25	~25	~6000			68.6	0.0125	4
Ba0.7Sr0.3TiO3	ceramic	0.7		10k	RT	8					55.6	0.015	5
Ba0.73Sr0.27TiO3	ceramic	0.73		3G	RT	17	20	5400	5400		69	0.1	10
Ba0.5Sr0.5TiO3	ceramic	0.5		10k	20	30	-26		2035		23.5	0.001	20
50 wt.% Ba0.5Sr0.5TiO3–50 wt.% Mg2(Ti0.95Sn0.05)O4	ceramic	0.5		10k	20	30	−36.2		849		17.5	0.0012	20
40 wt.% Ba0.5Sr0.5TiO3–60 wt.% Mg2(Ti0.95Sn0.05)O4	ceramic	0.5		10k	20	30	−35.1		434		17.1	0.0017	20
30 wt.% Ba0.5Sr0.5TiO3–70 wt.% Mg2(Ti0.95Sn0.05)O4	ceramic	0.5		10k	20	30	−33.1		144		15.8	0.0024	20
20 wt.% Ba0.5Sr0.5TiO3–80 wt.% Mg2(Ti0.95Sn0.05)O4	ceramic	0.5		10k	20	30	−32.5		38		10.7	0.0044	20
50 wt.% Ba0.5Sr0.5TiO3–50 wt.% Mg2TiO4	ceramic	0.5		10k	20	30	−28.9		417		18.4	0.0006	20
40 wt.% Ba0.5Sr0.5TiO3–60 wt.% Mg2TiO4	ceramic	0.5		10k	20	30	−25.7		224		18.1	0.0014	20
30 wt.% Ba0.5Sr0.5TiO3–70 wt.% Mg2TiO4	ceramic	0.5		10k	20	30	−25.5		98		16.4	0.0026	20
20 wt.% Ba0.5Sr0.5TiO3–80 wt.% Mg2TiO4	ceramic	0.5		10k	20	30	−25.0		44		10.8	0.0049	20
Ba0.7Sr0.3TiO3+10mol%MgO	ceramic	0.7		10k	RT	20			2037	avg: 0.6um	22	0.007	22
Ba0.7Sr0.3TiO3+7.5mol%MgO	ceramic	0.7		10k	RT	20			2199	avg: 0.6um	26	0.009	22
Ba0.7Sr0.3TiO3+5mol%MgO	ceramic	0.7		10k	RT	20			2286	avg: 0.6um	32	0.012	22
Ba0.7Sr0.3TiO3+2.5mol%MgO	ceramic	0.7		10k	RT	20			2520	0.3um-1um	34	0.013	22
Ba0.45Sr0.55TiO3	ceramic	0.45		10G	RT	20			1205		15.2	0.0138	27
Ba0.45Sr0.55TiO3+1wt% MgO	ceramic	0.45		10G	RT	20			942.92		3.71	0.0079	27
Ba0.45Sr0.55TiO3+5wt% MgO	ceramic	0.45		10G	RT	20			816.47		4.1	0.0071	27
Ba0.45Sr0.55TiO3+10wt% MgO	ceramic	0.45		10G	RT	20			655.8		3.9	0.0066	27
Ba0.45Sr0.55TiO3+20wt% MgO	ceramic	0.45		10G	RT	20			342.9		4	0.0064	27
Ba0.45Sr0.55TiO3+30wt% MgO	ceramic	0.45		10G	RT	20			362.8		4.78	0.0063	27
Ba0.45Sr0.55TiO3+60wt% MgO	ceramic	0.45		10G	RT	20			80.15		3.7	0.0041	27
Ba0.5Sr0.5TiO3	ceramic	0.5		10G	RT	20			1099		25	0.018	27
Ba0.5Sr0.5TiO3+5wt% MgO	ceramic	0.5		10G	RT	20			1004.3		5.1	0.0105	27
Ba0.5Sr0.5TiO3+10wt% MgO	ceramic	0.5		10G	RT	20			850.9		5.5	0.0103	27
Ba0.5Sr0.5TiO3+20wt% MgO	ceramic	0.5		10G	RT	20			616		6.4	0.0087	27
Ba0.5Sr0.5TiO3+30wt% MgO	ceramic	0.5		10G	RT	20			463		5.8	0.0085	27
Ba0.5Sr0.5TiO3+60wt% MgO	ceramic	0.5		10G	RT	20			84		3.7	0.0066	27
Ba0.55Sr0.45TiO3+0.25wt% MgO	ceramic	0.55		10G	RT	20			1526		20.8	0.0181	27
Ba0.55Sr0.45TiO3+0.5wt% MgO	ceramic	0.55		10G	RT	20			1519		11.6	0.0201	27
Ba0.55Sr0.45TiO3+1wt% MgO	ceramic	0.55		10G	RT	20			1463.53		6.52	0.0155	27
Ba0.55Sr0.45TiO3+5wt% MgO	ceramic	0.55		10G	RT	20			1289.6		8.63	0.015	27
Ba0.55Sr0.45TiO3+10wt% MgO	ceramic	0.55		10G	RT	20			1079		9	0.0167	27
Ba0.55Sr0.45TiO3+20wt% MgO	ceramic	0.55		10G	RT	20			704		8.8	0.0135	27
Ba0.55Sr0.45TiO3+30wt% MgO	ceramic	0.55		10G	RT	20			527		9.5	0.0121	27
Ba0.55Sr0.45TiO3+60wt% MgO	ceramic	0.55		10G	RT	20			99.8		6.5	0.008	27
Ba0.6Sr0.4TiO3	ceramic	0.6		10G	RT	20			1001.7		56.3	0.0908	27
Ba0.6Sr0.4TiO3+0.25wt% MgO	ceramic	0.6		10G	RT	20			2151.62		15.97	0.0395	27
Ba0.6Sr0.4TiO3+0.5wt% MgO	ceramic	0.6		10G	RT	20			2005.03		11.98	0.035	27
Ba0.6Sr0.4TiO3+1wt% MgO	ceramic	0.6		10G	RT	20			1949.06		15.41	0.0296	27
Ba0.6Sr0.4TiO3+5wt% MgO	ceramic	0.6		10G	RT	20			1668.78		15	0.0252	27
Ba0.6Sr0.4TiO3+10wt% MgO	ceramic	0.6		10G	RT	20			1431		16.6	0.023	27
Ba0.6Sr0.4TiO3+20wt% MgO	ceramic	0.6		10G	RT	20			871.2		15.8	0.0221	27
Ba0.6Sr0.4TiO3+30wt% MgO	ceramic	0.6		10G	RT	20			636		15	0.0203	27
Ba0.6Sr0.4TiO3+60wt% MgO	ceramic	0.6		10G	RT	20			118		10	0.0129	27
Ba0.6Sr0.4TiO3+150wt% MgO	ceramic	0.6		100k	RT	90					38	0.0025	29
Ba0.6Sr0.4TiO3	Film	0.6		8G	RT	100	~20		>8000		32	0.05	52
Ba0.6Sr0.4TiO3+1wt% MgO	Film	0.6		8G	RT	100	-30		~2000	~3–5um	24	0.04	52
Ba0.6Sr0.4TiO3+20wt% MgO	Film	0.6		8G	RT	100	~(-18)		~1200		10	0.0125	52
Ba0.6Sr0.4TiO3+40wt% MgO	Film	0.6		8G	RT	100			~700		8	0.012	52
Ba0.6Sr0.4TiO3+60wt% MgO	Film	0.6		8G	RT	100	~(-37)		>100		5	0.012	52
40wt%Ba0.6Sr0.4TiO3-Mg2SiO4-48wt%MgO	ceramic	0.6		100k	RT	20	-48	179	90	2um	10.5	0.005	53
40wt%Ba0.6Sr0.4TiO3-Mg2SiO4-30wt%MgO	ceramic	0.6		100k	RT	20	-53	140	80	2um	9.2	0.004	53
40wt%Ba0.6Sr0.4TiO3-Mg2SiO4-12wt%MgO	ceramic	0.6		100k	RT	20	-63	128	80	2um	10.2	0.004	53
Ba0.7Sr0.3TiO3	ceramic	0.7		1kHz	25 C	8	27	12500	12500	8.2 um	48	0.09	54
Ba0.7Sr0.3TiO3	ceramic	0.7		1kHz	25 C	8	27	11000	11000	5.6 um	45	0.07	54
Ba0.7Sr0.3TiO3	ceramic	0.7		1kHz	25 C	8	25	9500	9500	3.8 um	47	0.06	54
Ba0.7Sr0.3TiO3	ceramic	0.7		1kHz	25 C	8	25	8500	8800	2.5 um	43	0.045	54
Ba0.7Sr0.3TiO3	ceramic	0.7		1kHz	25 C	8	25	7500	7500	0.8 um	38	0.035	54
Ba0.6Sr0.4TiO3	ceramic	0.6		100k	RT	10	5.8	4000	2800	1.2 um	14	0.004	55
Ba0.6Sr0.4TiO3	ceramic	0.6		100k	RT	10	3.1	4000	2700	0.8 um	12.5	0.002	55
Ba0.6Sr0.4TiO3	ceramic	0.6		100k	RT	10	7.5	4000	2850	10 um	17	0.005	55
Ba0.6Sr0.4TiO3	ceramic	0.6		3.5G	RT	10	3.1	N/A	131	0.8 um	3	0.024	55
Ba0.6Sr0.4TiO3	ceramic	0.6		3.5G	RT	10	5.8	N/A	141	1.2 um	12	0.022	55
Ba0.6Sr0.4TiO3	ceramic	0.6		3.5G	RT	10	7.5	N/A	165	10 um	27	0.014	55
Ba0.6Sr0.4TiO3/10wt%MgO/20wt%Al2O3/0.5wt%ZnO	ceramic	0.6		10k	RT	10	9.5	2018	1235	2 um	23.4	0.0268	56
Ba0.6Sr0.4TiO3/10wt%MgO/20wt%Al2O3/1.0wt%ZnO	ceramic	0.6		10k	RT	10	10.2	2246	1459	2 um	27.4	0.0122	56
Ba0.6Sr0.4TiO3/10wt%MgO/20wt%Al2O3/2.0wt%ZnO	ceramic	0.6		10k	RT	10	15.3	2726	1935	2 um	26.9	0.0095	56
Ba0.6Sr0.4TiO3/10wt%MgO/20wt%Al2O3/4.0wt%ZnO	ceramic	0.6		10k	RT	10	4.6	2234	1432	3 um	19.3	0.0087	56
Ba0.6Sr0.4TiO3/10wt%MgO/20wt%Al2O3/5.0wt%ZnO	ceramic	0.6		10k	RT	10	-4.3	2272	1268	3 um	19	0.0086	56
Ba0.6Sr0.4TiO3/10wt%MgO/20wt%Al2O3/10.0wt%ZnO	ceramic	0.6		10k	RT	10	-20.3	2070	975	2 um	11.6	0.0045	56
Ba0.6Sr0.4TiO3/10wt%MgO/20wt%Al2O3/15.0wt%ZnO	ceramic	0.6		10k	RT	10	-23.9	1950	865	4 um	10.6	0.0075	56
Ba0.6Sr0.4TiO3/10wt%MgO/20wt%Al2O3/20.0wt%ZnO	ceramic	0.6		10k	RT	10	-18.4	1786	818	4 um	8.9	0.0082	56
Ba0.60Sr0.40TiO3	ceramic	0.6		10k	RT	20	-4.6	18000	5103	5 um	41.2	0.0025	57
70wt%Ba0.60Sr0.40TiO3/30 wt%Mg2TiO4	ceramic	0.6		10k	RT	20	-10.9	1900	909	3 um	38.5	0.0228	57
60wt%Ba0.60Sr0.40TiO3/40 wt%Mg2TiO4	ceramic	0.6		10k	RT	20	-10.2	1500	831	3 um	37.4	0.0123	57
50 wt%Ba0.60Sr0.40TiO3/50 wt%Mg2TiO4	ceramic	0.6		10k	RT	20	-9.6	800	401	2 um	36.3	0.0147	57
40 wt%Ba0.60Sr0.40TiO3/60 wt%Mg2TiO4	ceramic	0.6		10k	RT	20	-5.2	450	290	2 um	36	0.0083	57
30 wt%Ba0.60Sr0.40TiO3/70 wt%Mg2TiO4	ceramic	0.6		10k	RT	20	-2.3	240	168	2 um	34.3	0.0055	57
30 wt%Ba0.55Sr0.45TiO3/70 wt%Mg2TiO4	ceramic	0.55		10k	RT	20	-15.1	190	147	2 um	32.3	0.0031	57
30 wt%Ba0.50Sr0.50TiO3/70 wt%Mg2TiO4	ceramic	0.5		10k	RT	20	-30.1	195	129	2 um	23.5	0.0021	57
30 wt%Ba0.45Sr0.55TiO3/70 wt%Mg2TiO4	ceramic	0.45		10k	RT	20	-48.6	200	77	2 um	10.2	0.0007	57
0.5Ba0.5Sr0.5TiO3 – 0.5Mg2TiO4	ceramic	0.5	1200	10k	20 C	40	-35		266		20	0.012	58
0.4Ba0.5Sr0.5TiO3 – 0.6Mg2TiO4	ceramic	0.5	1200	10k	20 C	40	-35		180	0.5 - 1.5 um	16.2	0.009	58
0.3Ba0.5Sr0.5TiO3 – 0.7Mg2TiO4	ceramic	0.5	1100	10k	20 C	40	-92		61		4.99	0.047	58
Ba0.5Sr0.5TiO3	ceramic	0.5	1400 -2h	10k	20 C	30	-19.6	17472	2500	1.5 um	22.7	0.0008	59
50wt%Ba0.5Sr0.5TiO3 – 50wt%Mg2TiO4	ceramic	0.5	1400 - 2h	10k	20 C	30	-26.9	1015	335	2 um	18.4	0.0003	59
40wt%Ba0.5Sr0.5TiO3 – 60wt%Mg2TiO4	ceramic	0.5	1400 - 2h	10k	20 C	30	-24.2	450	190	2-3 um	18.1	0.0002	59
30wt%Ba0.5Sr0.5TiO3 – 70wt%Mg2TiO4	ceramic	0.5	1400 - 2h	10k	20 C	30	-21.6	150	84	3-4 um	16.4	0.0001	59
20wt%Ba0.5Sr0.5TiO3 – 80wt%Mg2TiO4	ceramic	0.5	1400 - 2h	10k	20 C	30	-21.1	43	35	4 um	10.8	0.0002	59
Ba0.8Sr0.2TiO3	ceramic	0.8	1450 - 2h	100M	RT	15	67	N/A	2172	3.7 um	10.5	0.07	60
(K0.49Na0.49Li0.02)(Nb0.8Ta0.2)O3	ceramic	0		1M	RT	30	337.6				50.8	0.052	12
0.75(K0.49Na0.49Li0.02)(Nb0.8Ta0.2)O3-0.25CaZrO3	ceramic	0		1M	RT	30	259.6				62.4	0.053	12
0.5(K0.49Na0.49Li0.02)(Nb0.8Ta0.2)O3-0.5CaZrO3	ceramic	0		1M	RT	30	181.3				61.1	0.05	12
0.25(K0.49Na0.49Li0.02)(Nb0.8Ta0.2)O3-0.75CaZrO3	ceramic	0		1M	RT	30	99.5				65.4	0.068	12
Ba0.6Sr0.4TiO3	ceramic	0.6		1M		20					56.3	0.00961	27
Ba0.6Sr0.4TiO3+10wt% MgO	ceramic	0.6		1M		20					16.6	0.00162	27
Ba0.6Sr0.4TiO3+20wt% MgO	ceramic	0.6		1M		20					15.8	0.00194	27
Ba0.6Sr0.4TiO3+30wt% MgO	ceramic	0.6		1M		20					14.8	0.00159	27
Ba0.6Sr0.4TiO3+60wt% MgO	ceramic	0.6		1M		20					9.9	0.00148	27
Ba0.65Sr0.35TiO3	ceramic	0.65	1653 - 5h	10k	15	25	15			0.3 um	68.58	0.01255	31
Ba0.5Sr0.5TiO3	ceramic	0.5	1593 - 5h	10k	15	20				0.8 um	19.4	0.0017	31
Ba0.55Sr0.45TiO3 - 30wt%MgO - 30wt%Mg2TiO4	ceramic	0.55	1360-1420 - 3h	1M		15			279		8.2	0.00024	18
Ba0.55Sr0.45TiO3 - 35wt%MgO - 30wt%Mg2TiO4	ceramic	0.55	1360-1420 - 3h	1M		15			237		8.4	0.00022	18
Ba0.55Sr0.45TiO3 - 25wt%MgO - 35wt%Mg2TiO4	ceramic	0.55	1360-1420 - 3h	1M		15			302		9.3	0.0002	18
Ba0.55Sr0.45TiO3 - 30wt%MgO - 35wt%Mg2TiO4	ceramic	0.55	1360-1420 - 3h	1M		15			257		8.1	0.00026	18
Ba0.55Sr0.45TiO3 - 40wt%Mg2TiO4	ceramic	0.55	1360-1420 - 3h	1M		15			600		9.3	0.00029	18
Ba0.55Sr0.45TiO3 - 45wt%MgO - 40wt%Mg2TiO4	ceramic	0.55	1360-1420 - 3h	1M		15			147		6.1	0.00024	18
Ba0.55Sr0.45TiO3 - 60wt%MgO - 40wt%Mg2TiO4	ceramic	0.55	1360-1420 - 3h	1M		15			108		5.4	0.00018	18
Ba0.55Sr0.45TiO3 - 80wt%Mg2TiO4	ceramic	0.55	1360-1420 - 3h	1M		15			284		11.3	0.00036	18
Ba0.55Sr0.45TiO3 - 20wt%MgO - 80wt%Mg2TiO4	ceramic	0.55	1360-1420 - 3h	1M		15			146		8	0.00018	18
Ba0.55Sr0.45TiO3 - 80wt%MgO - 80wt%Mg2TiO4	ceramic	0.55	1360-1420 - 3h	1M		15			57		2.3	0.00032	18
Ba0.55Sr0.45TiO3 - 100wt%Mg2TiO4	ceramic	0.55	1360-1420 - 3h	1M		15			195		10	0.00033	18
Ba0.55Sr0.45TiO3 - 20wt%MgO - 100wt%Mg2TiO4	ceramic	0.55	1360-1420 - 3h	1M		15			109		6.7	0.00021	18
Ba0.55Sr0.45TiO3 - 35wt%MgO - 100wt%Mg2TiO4	ceramic	0.55	1360-1420 - 3h	1M		15			81		4.3	0.00024	18
Ba0.55Sr0.45TiO3 - 30wt%MgO - 30wt%Mg2TiO4	ceramic	0.55	1360-1420 - 3h	1M		50			279		23.2	0.00024	18
Ba0.55Sr0.45TiO3 - 35wt%MgO - 30wt%Mg2TiO4	ceramic	0.55	1360-1420 - 3h	1M		50			237		23.4	0.00022	18
Ba0.55Sr0.45TiO3 - 25wt%MgO - 35wt%Mg2TiO4	ceramic	0.55	1360-1420 - 3h	1M		50			302		24.9	0.0002	18
Ba0.55Sr0.45TiO3 - 30wt%MgO - 35wt%Mg2TiO4	ceramic	0.55	1360-1420 - 3h	1M		50			257		23.6	0.00026	18
Ba0.55Sr0.45TiO3 - 40wt%Mg2TiO4	ceramic	0.55	1360-1420 - 3h	1M		50			600		25.2	0.00029	18
Ba0.55Sr0.45TiO3 - 45wt%MgO - 40wt%Mg2TiO4	ceramic	0.55	1360-1420 - 3h	1M		50			147		18	0.00024	18
Ba0.55Sr0.45TiO3 - 60wt%MgO - 40wt%Mg2TiO4	ceramic	0.55	1360-1420 - 3h	1M		50			108		14.8	0.00018	18
Ba0.55Sr0.45TiO3 - 80wt%Mg2TiO4	ceramic	0.55	1360-1420 - 3h	1M		50			284		26.6	0.00036	18
Ba0.55Sr0.45TiO3 - 20wt%MgO - 80wt%Mg2TiO4	ceramic	0.55	1360-1420 - 3h	1M		50			146		22.2	0.00018	18
Ba0.55Sr0.45TiO3 - 80wt%MgO - 80wt%Mg2TiO4	ceramic	0.55	1360-1420 - 3h	1M		50			57		8.3	0.00032	18
Ba0.55Sr0.45TiO3 - 100wt%Mg2TiO4	ceramic	0.55	1360-1420 - 3h	1M		50			195		24.9	0.00033	18
Ba0.55Sr0.45TiO3 - 20wt%MgO - 100wt%Mg2TiO4	ceramic	0.55	1360-1420 - 3h	1M		50			109		18.7	0.00021	18
Ba0.55Sr0.45TiO3 - 35wt%MgO - 100wt%Mg2TiO4	ceramic	0.55	1360-1420 - 3h	1M		50			81		12.9	0.00024	18
Ba0.55Sr0.45TiO3 - 30wt%MgO - 30wt%Mg2TiO4	ceramic	0.55	1360-1420 - 3h	1M		80			279		30.3	0.00024	18
Ba0.55Sr0.45TiO3 - 35wt%MgO - 30wt%Mg2TiO4	ceramic	0.55	1360-1420 - 3h	1M		80			237		30.2	0.00022	18
Ba0.55Sr0.45TiO3 - 25wt%MgO - 35wt%Mg2TiO4	ceramic	0.55	1360-1420 - 3h	1M		80			302		32.3	0.0002	18
Ba0.55Sr0.45TiO3 - 30wt%MgO - 35wt%Mg2TiO4	ceramic	0.55	1360-1420 - 3h	1M		80			257		30.6	0.00026	18
Ba0.55Sr0.45TiO3 - 40wt%Mg2TiO4	ceramic	0.55	1360-1420 - 3h	1M		80			600		38.3	0.00029	18
Ba0.55Sr0.45TiO3 - 45wt%MgO - 40wt%Mg2TiO4	ceramic	0.55	1360-1420 - 3h	1M		80			147		26.3	0.00024	18
Ba0.55Sr0.45TiO3 - 60wt%MgO - 40wt%Mg2TiO4	ceramic	0.55	1360-1420 - 3h	1M		80			108		21.8	0.00018	18
Ba0.55Sr0.45TiO3 - 80wt%Mg2TiO4	ceramic	0.55	1360-1420 - 3h	1M		80			284		39.4	0.00036	18
Ba0.55Sr0.45TiO3 - 20wt%MgO - 80wt%Mg2TiO4	ceramic	0.55	1360-1420 - 3h	1M		80			146		30.5	0.00018	18
Ba0.55Sr0.45TiO3 - 80wt%MgO - 80wt%Mg2TiO4	ceramic	0.55	1360-1420 - 3h	1M		80			57		11.3	0.00032	18
Ba0.55Sr0.45TiO3 - 100wt%Mg2TiO4	ceramic	0.55	1360-1420 - 3h	1M		80			195		36.3	0.00033	18
Ba0.55Sr0.45TiO3 - 20wt%MgO - 100wt%Mg2TiO4	ceramic	0.55	1360-1420 - 3h	1M		80			109		25.4	0.00021	18
Ba0.55Sr0.45TiO3 - 35wt%MgO - 100wt%Mg2TiO4	ceramic	0.55	1360-1420 - 3h	1M		80			81		17.7	0.00024	18
Ba0.55Sr0.45TiO3 - 30wt%MgO - 30wt%Mg2TiO4	ceramic	0.55	1360-1420 - 3h	microwave (3.5G)		15			263		8.2	0.000975	18
Ba0.55Sr0.45TiO3 - 35wt%MgO - 30wt%Mg2TiO4	ceramic	0.55	1360-1420 - 3h	microwave (3.5G)		15			235		8.4	0.000917	18
Ba0.55Sr0.45TiO3 - 25wt%MgO - 35wt%Mg2TiO4	ceramic	0.55	1360-1420 - 3h	microwave (3.5G)		15			246		9.3	0.001	18
Ba0.55Sr0.45TiO3 - 30wt%MgO - 35wt%Mg2TiO4	ceramic	0.55	1360-1420 - 3h	microwave (3.5G)		15			246		8.1	0.00099	18
Ba0.55Sr0.45TiO3 - 40wt%Mg2TiO4	ceramic	0.55	1360-1420 - 3h	microwave (3.5G)		15			527		9.3	0.00154	18
Ba0.55Sr0.45TiO3 - 45wt%MgO - 40wt%Mg2TiO4	ceramic	0.55	1360-1420 - 3h	microwave (3.5G)		15			138		6.1	0.00079	18
Ba0.55Sr0.45TiO3 - 60wt%MgO - 40wt%Mg2TiO4	ceramic	0.55	1360-1420 - 3h	microwave (3.5G)		15			103		5.4	0.00065	18
Ba0.55Sr0.45TiO3 - 80wt%Mg2TiO4	ceramic	0.55	1360-1420 - 3h	microwave (3.5G)		15			253		11.3	0.0018	18
Ba0.55Sr0.45TiO3 - 20wt%MgO - 80wt%Mg2TiO4	ceramic	0.55	1360-1420 - 3h	microwave (3.5G)		15			139		8	0.001	18
Ba0.55Sr0.45TiO3 - 80wt%MgO - 80wt%Mg2TiO4	ceramic	0.55	1360-1420 - 3h	microwave (3.5G)		15			55		2.3	0.00042	18
Ba0.55Sr0.45TiO3 - 100wt%Mg2TiO4	ceramic	0.55	1360-1420 - 3h	microwave (3.5G)		15			170		10	0.002	18
Ba0.55Sr0.45TiO3 - 20wt%MgO - 100wt%Mg2TiO4	ceramic	0.55	1360-1420 - 3h	microwave (3.5G)		15			101		6.7	0.001	18
Ba0.55Sr0.45TiO3 - 35wt%MgO - 100wt%Mg2TiO4	ceramic	0.55	1360-1420 - 3h	microwave (3.5G)		15			77		4.3	0.00064	18
Ba0.55Sr0.45TiO3 - 30wt%MgO - 30wt%Mg2TiO4	ceramic	0.55	1360-1420 - 3h	microwave (3.5G)		50			263		23.2	0.000975	18
Ba0.55Sr0.45TiO3 - 35wt%MgO - 30wt%Mg2TiO4	ceramic	0.55	1360-1420 - 3h	microwave (3.5G)		50			235		23.4	0.000917	18
Ba0.55Sr0.45TiO3 - 25wt%MgO - 35wt%Mg2TiO4	ceramic	0.55	1360-1420 - 3h	microwave (3.5G)		50			246		24.9	0.001	18
Ba0.55Sr0.45TiO3 - 30wt%MgO - 35wt%Mg2TiO4	ceramic	0.55	1360-1420 - 3h	microwave (3.5G)		50			246		23.6	0.00099	18
Ba0.55Sr0.45TiO3 - 40wt%Mg2TiO4	ceramic	0.55	1360-1420 - 3h	microwave (3.5G)		50			527		25.2	0.00154	18
Ba0.55Sr0.45TiO3 - 45wt%MgO - 40wt%Mg2TiO4	ceramic	0.55	1360-1420 - 3h	microwave (3.5G)		50			138		18	0.00079	18
Ba0.55Sr0.45TiO3 - 60wt%MgO - 40wt%Mg2TiO4	ceramic	0.55	1360-1420 - 3h	microwave (3.5G)		50			103		14.8	0.00065	18
Ba0.55Sr0.45TiO3 - 80wt%Mg2TiO4	ceramic	0.55	1360-1420 - 3h	microwave (3.5G)		50			253		26.6	0.0018	18
Ba0.55Sr0.45TiO3 - 20wt%MgO - 80wt%Mg2TiO4	ceramic	0.55	1360-1420 - 3h	microwave (3.5G)		50			139		22.2	0.001	18
Ba0.55Sr0.45TiO3 - 80wt%MgO - 80wt%Mg2TiO4	ceramic	0.55	1360-1420 - 3h	microwave (3.5G)		50			55		8.3	0.00042	18
Ba0.55Sr0.45TiO3 - 100wt%Mg2TiO4	ceramic	0.55	1360-1420 - 3h	microwave (3.5G)		50			170		24.9	0.002	18
Ba0.55Sr0.45TiO3 - 20wt%MgO - 100wt%Mg2TiO4	ceramic	0.55	1360-1420 - 3h	microwave (3.5G)		50			101		18.7	0.001	18
Ba0.55Sr0.45TiO3 - 35wt%MgO - 100wt%Mg2TiO4	ceramic	0.55	1360-1420 - 3h	microwave (3.5G)		50			77		12.9	0.00064	18
Ba0.55Sr0.45TiO3 - 30wt%MgO - 30wt%Mg2TiO4	ceramic	0.55	1360-1420 - 3h	microwave (3.5G)		80			263		30.3	0.000975	18
Ba0.55Sr0.45TiO3 - 35wt%MgO - 30wt%Mg2TiO4	ceramic	0.55	1360-1420 - 3h	microwave (3.5G)		80			235		30.2	0.000917	18
Ba0.55Sr0.45TiO3 - 25wt%MgO - 35wt%Mg2TiO4	ceramic	0.55	1360-1420 - 3h	microwave (3.5G)		80			246		32.3	0.001	18
Ba0.55Sr0.45TiO3 - 30wt%MgO - 35wt%Mg2TiO4	ceramic	0.55	1360-1420 - 3h	microwave (3.5G)		80			246		30.6	0.00099	18
Ba0.55Sr0.45TiO3 - 40wt%Mg2TiO4	ceramic	0.55	1360-1420 - 3h	microwave (3.5G)		80			527		38.3	0.00154	18
Ba0.55Sr0.45TiO3 - 45wt%MgO - 40wt%Mg2TiO4	ceramic	0.55	1360-1420 - 3h	microwave (3.5G)		80			138		26.3	0.00079	18
Ba0.55Sr0.45TiO3 - 60wt%MgO - 40wt%Mg2TiO4	ceramic	0.55	1360-1420 - 3h	microwave (3.5G)		80			103		21.8	0.00065	18
Ba0.55Sr0.45TiO3 - 80wt%Mg2TiO4	ceramic	0.55	1360-1420 - 3h	microwave (3.5G)		80			253		39.4	0.0018	18
Ba0.55Sr0.45TiO3 - 20wt%MgO - 80wt%Mg2TiO4	ceramic	0.55	1360-1420 - 3h	microwave (3.5G)		80			139		30.5	0.001	18
Ba0.55Sr0.45TiO3 - 80wt%MgO - 80wt%Mg2TiO4	ceramic	0.55	1360-1420 - 3h	microwave (3.5G)		80			55		11.3	0.00042	18
Ba0.55Sr0.45TiO3 - 100wt%Mg2TiO4	ceramic	0.55	1360-1420 - 3h	microwave (3.5G)		80			170		36.3	0.002	18
Ba0.55Sr0.45TiO3 - 20wt%MgO - 100wt%Mg2TiO4	ceramic	0.55	1360-1420 - 3h	microwave (3.5G)		80			101		25.4	0.001	18
Ba0.55Sr0.45TiO3 - 35wt%MgO - 100wt%Mg2TiO4	ceramic	0.55	1360-1420 - 3h	microwave (3.5G)		80			77		17.7	0.00064	18
Ba0.6Sr0.4TiO3	ceramic	0.6		10k		30	10		7200		50.1	0.0021	63
Ba0.6Sr0.4TiO3	ceramic	0.6		10k		20	10				56.3	0.0021	63
Ba0.5Sr0.5TiO3	ceramic	0.5		10k		30	-26		2035		23.5	0.001	63
Ba0.5Sr0.5TiO3	ceramic	0.5		10k		20	-26				25	0.001	63
Ba0.4Sr0.6TiO3	ceramic	0.4		10k		30	-62		1136		18.8	0.0008	63
Ba0.3Sr0.7TiO3	ceramic	0.3		10k		30	-99		640		5.4	0.0005	63
Ba0.6Sr0.4TiO3	thick film	0.6	1350	1k	RT	20	3		543	0.7 um	19	0.006	65
Ba0.6Sr0.4TiO3	thick film	0.6	1350	20k	RT	20	3		511	0.7 um	20	0.009	65
Ba0.6Sr0.4TiO3	thick film	0.6	1350	1M	RT	20	3		386	0.7 um	18	0.009	65
Ba0.6Sr0.4TiO3	thick film	0.6	1350	20G	RT	40	3		321	0.7 um	8	0.09	65
Ba0.55Sr0.45TiO3	ceramic	0.55		10k	20C	30	-8		2999		30.9	0.0023	66
Ba0.55Sr0.45TiO3 - 0.005MgO	ceramic	0.55		10k	20C	30	-18		2059		22.7	0.0053	66
Ba0.55Sr0.45TiO3 - 0.01MgO	ceramic	0.55		10k	20C	30	-22		1865		21.6	0.0067	66
Ba0.55Sr0.45TiO3 - 0.015MgO	ceramic	0.55		10k	20C	30	-26		1533		18.6	0.008	66
Ba0.55Sr0.45TiO3 - 0.02MgO	ceramic	0.55		10k	20C	30	-29		1625		16.1	0.0032	66
Ba0.55Sr0.45TiO3 - 0.025MgO	ceramic	0.55		10k	20C	30	-29		1524		15.5	0.0033	66
Ba0.55Sr0.45TiO3 - 0.03MgO	ceramic	0.55		10k	20C	30	-29		1521		13.8	0.003	66
Ba0.55Sr0.45TiO3 - 0.035MgO	ceramic	0.55		10k	20C	30	-29		1373		12.7	0.0035	66
Ba0.55Sr0.45TiO3	ceramic	0.55		microwave	20C	30	-8		2495		30.9	0.0032	66
Ba0.55Sr0.45TiO3 - 0.005MgO	ceramic	0.55		microwave	20C	30	-18		1635		22.7	0.0033	66
Ba0.55Sr0.45TiO3 - 0.01MgO	ceramic	0.55		microwave	20C	30	-22		1551		21.6	0.0034	66
Ba0.55Sr0.45TiO3 - 0.015MgO	ceramic	0.55		microwave	20C	30	-26		1376		18.6	0.0042	66
Ba0.55Sr0.45TiO3 - 0.02MgO	ceramic	0.55		microwave	20C	30	-29		1389		16.1	0.004	66
Ba0.55Sr0.45TiO3 - 0.025MgO	ceramic	0.55		microwave	20C	30	-29		1382		15.5	0.0037	66
Ba0.55Sr0.45TiO3 - 0.03MgO	ceramic	0.55		microwave	20C	30	-29		1395		13.8	0.00369	66
Ba0.55Sr0.45TiO3 - 0.035MgO	ceramic	0.55		microwave	20C	30	-29		1198		12.7	0.00358	66
45.0 wt% (Ba0.5Sr0.5)TiO3–55.0 wt% MgO	ceramic	0.5	1380	microwave (9GHz)	RT	8.3			85		14.8	0.01	68
100%wt Ba0.6Sr0.4TiO3 - 0%wt MgZrO3	ceramic	0.6		1k	RT	7.3	10		3299		19.91	0.0195	69
Ba0.6Sr0.4TiO3 - 1%wt MgZrO3	ceramic	0.6		1k	RT	11.4	-15		2515.3		12.24	0.0011	69
Ba0.6Sr0.4TiO3 - 10%wt MgZrO3	ceramic	0.6		1k	RT	15.6	-20		1868.9		11.63	0.0013	69
Ba0.6Sr0.4TiO3 - 20%wt MgZrO3	ceramic	0.6		1k	RT	13.3	<-55		1016		10.89	_	69
Ba0.6Sr0.4TiO3 - 30%wt MgZrO3	ceramic	0.6		1k	RT	13.4	<-55		389.06		1.607	0.0009	69
Ba0.6Sr0.4TiO3 - 60%wt MgZrO3	ceramic	0.6		1k	RT	9.9	<-55		93.591		0.45	0.0022	69
Ba0.6Sr0.4TiO3 - 1%wt MgAl2O4	ceramic	0.6		1k	RT	20	-10		3299.1		35.24	0.0066	69
Ba0.6Sr0.4TiO3 - 5%wt MgAl2O4	ceramic	0.6		1k	RT	20	0		2267.4		29.78	0.005	69
Ba0.6Sr0.4TiO3 - 10%wt MgAl2O4	ceramic	0.6		1k	RT	20	-25		1264.6		19.94	0.0057	69
Ba0.6Sr0.4TiO3 - 20%wt MgAl2O4	ceramic	0.6		1k	RT	20	-20		842.23		19.93	0.0146	69
Ba0.6Sr0.4TiO3 - 30%wt MgAl2O4	ceramic	0.6		1k	RT	20	-10		413.04		22.72	0.0313	69
Ba0.6Sr0.4TiO3 - 60%wt MgAl2O4	ceramic	0.6		1k	RT	20	0		76.7		17	0.0125	69
Ba0.6Sr0.4TiO3 - 1%wt MgTiO3	ceramic	0.6		1k	RT	20	-17		2256.5		30.96	0.0014	69
Ba0.6Sr0.4TiO3 - 5%wt MgTiO3	ceramic	0.6		1k	RT	20	-15		2193.2		17.89	0.0021	69
Ba0.6Sr0.4TiO3 - 10%wt MgTiO3	ceramic	0.6		1k	RT	20	-15		1386.5		18.69	0.0022	69
Ba0.6Sr0.4TiO3 - 20%wt MgTiO3	ceramic	0.6		1k	RT	20	-13		649.9		15.23	0.0021	69
Ba0.6Sr0.4TiO3 - 30%wt MgTiO3	ceramic	0.6		1k	RT	20	-50		263.52		11.52	0.0056	69
Ba0.6Sr0.4TiO3 - 60%wt MgTiO3	ceramic	0.6		1k	RT	20	<-55		108.25		3.7	0.0085	69
45wt%Ba0.55Sr0.45TiO3 – 55wt%MgO (BaTiO3 +SrTiO3+basic magnesium carbonate)	ceramic	0.55	1450C/3h	microwave	RT	30			65.69	BST- 1.63um / MgO - 4.27um	5.58	0.0039	71
45wt%Ba0.55Sr0.45TiO3 – 55wt%MgO (BaTiO3 +SrTiO3+light magnesium oxide)	ceramic	0.55	1450C/3h	microwave	RT	30			73.76	BST - 1.21um / MgO - 4.29um	4.52	0.00373	71
45wt%Ba0.55Sr0.45TiO3 – 55wt%MgO (BaTiO3 +SrTiO3+heavy magnesium oxide)	ceramic	0.55	1450C/3h	microwave	RT	30			85.57	BST - 1.62um / MgO - 4.21um	7	0.004	71
45wt%Ba0.55Sr0.45TiO3 – 55wt%MgO (BaCO3 , SrCO3 , TiO2+basic magnesium carbonate)	ceramic	0.55	1450C/3h	microwave	RT	30			99.34	BST - 2.48um / MgO - 6.48um	8.51	0.00392	71
45wt%Ba0.55Sr0.45TiO3 – 55wt%MgO (BaCO3 , SrCO3 , TiO2+light magnesium oxide)	ceramic	0.55	1450C/3h	microwave	RT	30			104.29	BST - 3.82um / MgO - 5.75um	6.49	0.00408	71
45wt%Ba0.55Sr0.45TiO3 – 55wt%MgO (BaCO3 , SrCO3 , TiO2+heavy magnesium oxide)	ceramic	0.55	1450C/3h	microwave	RT	30			141.55	BST - 2.94um / MgO - 7.10um	7.16	0.00289	71

## Sheet: Graph Approximations
Material	Film or Ceramic	x	Sintering Temperature (C)	Frequency	Temperature	E (kV/cm)	Tc	Permittivity at Tc	Permittivity at RT (0 kV/cm)	Grain Size	Tunability %	Tand	References
0.7Ba0.45Sr0.55TiO3 - 0.3[0.8Mg2TiO4 - 0.2MgO]	ceramic	0.45	1400	10k		4.6			461.4		0.6	0.00088	61
0.7Ba0.45Sr0.55TiO3 - 0.3[0.8Mg2TiO4 - 0.2MgO]	ceramic	0.45	1400	10k		5.5			461.4		0.7	0.00088	61
0.7Ba0.45Sr0.55TiO3 - 0.3[0.8Mg2TiO4 - 0.2MgO]	ceramic	0.45	1400	10k		6.4			461.4		1.1	0.00088	61
0.7Ba0.45Sr0.55TiO3 - 0.3[0.8Mg2TiO4 - 0.2MgO]	ceramic	0.45	1400	10k		7.4			461.4		1.5	0.00088	61
0.7Ba0.45Sr0.55TiO3 - 0.3[0.8Mg2TiO4 - 0.2MgO]	ceramic	0.45	1400	10k		8.3			461.4		1.8	0.00088	61
0.7Ba0.45Sr0.55TiO3 - 0.3[0.8Mg2TiO4 - 0.2MgO]	ceramic	0.45	1400	10k		9.3			461.4		2.2	0.00088	61
0.7Ba0.45Sr0.55TiO3 - 0.3[0.8Mg2TiO4 - 0.2MgO]	ceramic	0.45	1400	10k		10			461.4		2.7	0.00088	61
0.7Ba0.45Sr0.55TiO3 - 0.3[0.8Mg2TiO4 - 0.2MgO]	ceramic	0.45	1400	10k		10.5			461.4		3.1	0.00088	61
0.7Ba0.45Sr0.55TiO3 - 0.3[0.8Mg2TiO4 - 0.2MgO]	ceramic	0.45	1400	10k		11.2			461.4		3.3	0.00088	61
0.7Ba0.45Sr0.55TiO3 - 0.3[0.8Mg2TiO4 - 0.2MgO]	ceramic	0.45	1400	10k		12			461.4		3.7	0.00088	61
0.7Ba0.45Sr0.55TiO3 - 0.3[0.8Mg2TiO4 - 0.2MgO]	ceramic	0.45	1400	10k		12.9			461.4		4.2	0.00088	61
0.7Ba0.45Sr0.55TiO3 - 0.3[0.8Mg2TiO4 - 0.2MgO]	ceramic	0.45	1400	10k		13.9			461.4		4.8	0.00088	61
0.7Ba0.45Sr0.55TiO3 - 0.3[0.8Mg2TiO4 - 0.2MgO]	ceramic	0.45	1400	10k		14.8			461.4		5.3	0.00088	61
0.7Ba0.45Sr0.55TiO3 - 0.3[0.8Mg2TiO4 - 0.2MgO]	ceramic	0.45	1400	10k		15.7			461.4		5.8	0.00088	61
0.7Ba0.45Sr0.55TiO3 - 0.3[0.8Mg2TiO4 - 0.2MgO]	ceramic	0.45	1400	10k		16.6			461.4		6.4	0.00088	61
0.7Ba0.45Sr0.55TiO3 - 0.3[0.8Mg2TiO4 - 0.2MgO]	ceramic	0.45	1400	10k		17.5			461.4		6.9	0.00088	61
0.7Ba0.45Sr0.55TiO3 - 0.3[0.8Mg2TiO4 - 0.2MgO]	ceramic	0.45	1400	10k		18.5			461.4		7.6	0.00088	61
0.7Ba0.45Sr0.55TiO3 - 0.3[0.8Mg2TiO4 - 0.2MgO]	ceramic	0.45	1400	10k		19.4			461.4		8.1	0.00088	61
0.7Ba0.45Sr0.55TiO3 - 0.3[0.8Mg2TiO4 - 0.2MgO]	ceramic	0.45	1400	10k		20.1			461.4		8.7	0.00088	61
0.7Ba0.45Sr0.55TiO3 - 0.3[0.8Mg2TiO4 - 0.2MgO]	ceramic	0.45	1400	10k		20.6			461.4		8.8	0.00088	61
0.7Ba0.45Sr0.55TiO3 - 0.3[0.8Mg2TiO4 - 0.2MgO]	ceramic	0.45	1400	10k		21.3			461.4		9.6	0.00088	61
0.55Ba0.45Sr0.55TiO3 - 0.45[0.8Mg2TiO4 - 0.2MgO]	ceramic	0.45	1400	10k		2.9			283.5		0.2	0.00081	61
0.55Ba0.45Sr0.55TiO3 - 0.45[0.8Mg2TiO4 - 0.2MgO]	ceramic	0.45	1400	10k		3.9			283.5		0.5	0.00081	61
0.55Ba0.45Sr0.55TiO3 - 0.45[0.8Mg2TiO4 - 0.2MgO]	ceramic	0.45	1400	10k		4.9			283.5		0.8	0.00081	61
0.55Ba0.45Sr0.55TiO3 - 0.45[0.8Mg2TiO4 - 0.2MgO]	ceramic	0.45	1400	10k		5.8			283.5		1.3	0.00081	61
0.55Ba0.45Sr0.55TiO3 - 0.45[0.8Mg2TiO4 - 0.2MgO]	ceramic	0.45	1400	10k		6.8			283.5		1.9	0.00081	61
0.55Ba0.45Sr0.55TiO3 - 0.45[0.8Mg2TiO4 - 0.2MgO]	ceramic	0.45	1400	10k		7.7			283.5		2.4	0.00081	61
0.55Ba0.45Sr0.55TiO3 - 0.45[0.8Mg2TiO4 - 0.2MgO]	ceramic	0.45	1400	10k		8.7			283.5		3	0.00081	61
0.55Ba0.45Sr0.55TiO3 - 0.45[0.8Mg2TiO4 - 0.2MgO]	ceramic	0.45	1400	10k		9.8			283.5		3.5	0.00081	61
0.55Ba0.45Sr0.55TiO3 - 0.45[0.8Mg2TiO4 - 0.2MgO]	ceramic	0.45	1400	10k		10.2			283.5		3.8	0.00081	61
0.55Ba0.45Sr0.55TiO3 - 0.45[0.8Mg2TiO4 - 0.2MgO]	ceramic	0.45	1400	10k		10.7			283.5		4.3	0.00081	61
0.55Ba0.45Sr0.55TiO3 - 0.45[0.8Mg2TiO4 - 0.2MgO]	ceramic	0.45	1400	10k		11.6			283.5		4.9	0.00081	61
0.55Ba0.45Sr0.55TiO3 - 0.45[0.8Mg2TiO4 - 0.2MgO]	ceramic	0.45	1400	10k		12.6			283.5		5.6	0.00081	61
0.55Ba0.45Sr0.55TiO3 - 0.45[0.8Mg2TiO4 - 0.2MgO]	ceramic	0.45	1400	10k		13.6			283.5		6.2	0.00081	61
0.55Ba0.45Sr0.55TiO3 - 0.45[0.8Mg2TiO4 - 0.2MgO]	ceramic	0.45	1400	10k		14.6			283.5		6.9	0.00081	61
0.55Ba0.45Sr0.55TiO3 - 0.45[0.8Mg2TiO4 - 0.2MgO]	ceramic	0.45	1400	10k		15.5			283.5		7.7	0.00081	61
0.55Ba0.45Sr0.55TiO3 - 0.45[0.8Mg2TiO4 - 0.2MgO]	ceramic	0.45	1400	10k		16.5			283.5		8.3	0.00081	61
0.55Ba0.45Sr0.55TiO3 - 0.45[0.8Mg2TiO4 - 0.2MgO]	ceramic	0.45	1400	10k		17.5			283.5		9.1	0.00081	61
0.55Ba0.45Sr0.55TiO3 - 0.45[0.8Mg2TiO4 - 0.2MgO]	ceramic	0.45	1400	10k		18.5			283.5		9.7	0.00081	61
0.55Ba0.45Sr0.55TiO3 - 0.45[0.8Mg2TiO4 - 0.2MgO]	ceramic	0.45	1400	10k		19.5			283.5		10.5	0.00081	61
0.55Ba0.45Sr0.55TiO3 - 0.45[0.8Mg2TiO4 - 0.2MgO]	ceramic	0.45	1400	10k		20.3			283.5		11	0.00081	61
0.55Ba0.45Sr0.55TiO3 - 0.45[0.8Mg2TiO4 - 0.2MgO]	ceramic	0.45	1400	10k		20.7			283.5		11.2	0.00081	61
0.55Ba0.45Sr0.55TiO3 - 0.45[0.8Mg2TiO4 - 0.2MgO]	ceramic	0.45	1400	10k		21.4			283.5		11.8	0.00081	61
0.55Ba0.45Sr0.55TiO3 - 0.45[0.8Mg2TiO4 - 0.2MgO]	ceramic	0.45	1400	10k		22.3			283.5		12.4	0.00081	61
0.55Ba0.45Sr0.55TiO3 - 0.45[0.8Mg2TiO4 - 0.2MgO]	ceramic	0.45	1400	10k		23.3			283.5		13	0.00081	61
0.55Ba0.45Sr0.55TiO3 - 0.45[0.8Mg2TiO4 - 0.2MgO]	ceramic	0.45	1400	10k		24.3			283.5		13.6	0.00081	61
0.55Ba0.45Sr0.55TiO3 - 0.45[0.8Mg2TiO4 - 0.2MgO]	ceramic	0.45	1400	10k		25.3			283.5		14.2	0.00081	61
0.55Ba0.45Sr0.55TiO3 - 0.45[0.8Mg2TiO4 - 0.2MgO]	ceramic	0.45	1400	10k		26.2			283.5		14.8	0.00081	61
0.55Ba0.45Sr0.55TiO3 - 0.45[0.8Mg2TiO4 - 0.2MgO]	ceramic	0.45	1400	10k		27.2			283.5		15.4	0.00081	61
0.55Ba0.45Sr0.55TiO3 - 0.45[0.8Mg2TiO4 - 0.2MgO]	ceramic	0.45	1400	10k		28.2			283.5		15.9	0.00081	61
0.5Ba0.45Sr0.55TiO3 - 0.5[0.8Mg2TiO4 - 0.2MgO]	ceramic	0.45	1400	10k		5.2			212.4		1.4	0.001	61
0.5Ba0.45Sr0.55TiO3 - 0.5[0.8Mg2TiO4 - 0.2MgO]	ceramic	0.45	1400	10k		6.2			212.4		1.8	0.001	61
0.5Ba0.45Sr0.55TiO3 - 0.5[0.8Mg2TiO4 - 0.2MgO]	ceramic	0.45	1400	10k		7.3			212.4		2.2	0.001	61
0.5Ba0.45Sr0.55TiO3 - 0.5[0.8Mg2TiO4 - 0.2MgO]	ceramic	0.45	1400	10k		8.4			212.4		2.7	0.001	61
0.5Ba0.45Sr0.55TiO3 - 0.5[0.8Mg2TiO4 - 0.2MgO]	ceramic	0.45	1400	10k		9.4			212.4		3.4	0.001	61
0.5Ba0.45Sr0.55TiO3 - 0.5[0.8Mg2TiO4 - 0.2MgO]	ceramic	0.45	1400	10k		9.9			212.4		3.9	0.001	61
0.5Ba0.45Sr0.55TiO3 - 0.5[0.8Mg2TiO4 - 0.2MgO]	ceramic	0.45	1400	10k		10.5			212.4		4.2	0.001	61
0.5Ba0.45Sr0.55TiO3 - 0.5[0.8Mg2TiO4 - 0.2MgO]	ceramic	0.45	1400	10k		10.7			212.4		4.9	0.001	61
0.5Ba0.45Sr0.55TiO3 - 0.5[0.8Mg2TiO4 - 0.2MgO]	ceramic	0.45	1400	10k		11.6			212.4		5.6	0.001	61
0.5Ba0.45Sr0.55TiO3 - 0.5[0.8Mg2TiO4 - 0.2MgO]	ceramic	0.45	1400	10k		12.6			212.4		6.1	0.001	61
0.5Ba0.45Sr0.55TiO3 - 0.5[0.8Mg2TiO4 - 0.2MgO]	ceramic	0.45	1400	10k		13.6			212.4		6.9	0.001	61
0.5Ba0.45Sr0.55TiO3 - 0.5[0.8Mg2TiO4 - 0.2MgO]	ceramic	0.45	1400	10k		14.7			212.4		7.6	0.001	61
0.5Ba0.45Sr0.55TiO3 - 0.5[0.8Mg2TiO4 - 0.2MgO]	ceramic	0.45	1400	10k		15.6			212.4		8.2	0.001	61
0.5Ba0.45Sr0.55TiO3 - 0.5[0.8Mg2TiO4 - 0.2MgO]	ceramic	0.45	1400	10k		16.8			212.4		8.9	0.001	61
0.5Ba0.45Sr0.55TiO3 - 0.5[0.8Mg2TiO4 - 0.2MgO]	ceramic	0.45	1400	10k		17.9			212.4		9.6	0.001	61
0.5Ba0.45Sr0.55TiO3 - 0.5[0.8Mg2TiO4 - 0.2MgO]	ceramic	0.45	1400	10k		18.9			212.4		10.3	0.001	61
0.5Ba0.45Sr0.55TiO3 - 0.5[0.8Mg2TiO4 - 0.2MgO]	ceramic	0.45	1400	10k		19.9			212.4		10.9	0.001	61
0.5Ba0.45Sr0.55TiO3 - 0.5[0.8Mg2TiO4 - 0.2MgO]	ceramic	0.45	1400	10k		21			212.4		11.9	0.001	61
0.5Ba0.45Sr0.55TiO3 - 0.5[0.8Mg2TiO4 - 0.2MgO]	ceramic	0.45	1400	10k		22			212.4		12.8	0.001	61
0.45Ba0.45Sr0.55TiO3 - 0.55[0.8Mg2TiO4 - 0.2MgO]	ceramic	0.45	1400	10k		4.6			165.3		1.5	0.00105	61
0.45Ba0.45Sr0.55TiO3 - 0.55[0.8Mg2TiO4 - 0.2MgO]	ceramic	0.45	1400	10k		5.6			165.3		2.1	0.00105	61
0.45Ba0.45Sr0.55TiO3 - 0.55[0.8Mg2TiO4 - 0.2MgO]	ceramic	0.45	1400	10k		6.5			165.3		2.8	0.00105	61
0.45Ba0.45Sr0.55TiO3 - 0.55[0.8Mg2TiO4 - 0.2MgO]	ceramic	0.45	1400	10k		7.4			165.3		3.5	0.00105	61
0.45Ba0.45Sr0.55TiO3 - 0.55[0.8Mg2TiO4 - 0.2MgO]	ceramic	0.45	1400	10k		8.4			165.3		4.4	0.00105	61
0.45Ba0.45Sr0.55TiO3 - 0.55[0.8Mg2TiO4 - 0.2MgO]	ceramic	0.45	1400	10k		9.3			165.3		5.3	0.00105	61
0.45Ba0.45Sr0.55TiO3 - 0.55[0.8Mg2TiO4 - 0.2MgO]	ceramic	0.45	1400	10k		9.9			165.3		6	0.00105	61
0.45Ba0.45Sr0.55TiO3 - 0.55[0.8Mg2TiO4 - 0.2MgO]	ceramic	0.45	1400	10k		10.2			165.3		6.5	0.00105	61
0.45Ba0.45Sr0.55TiO3 - 0.55[0.8Mg2TiO4 - 0.2MgO]	ceramic	0.45	1400	10k		11.1			165.3		7.2	0.00105	61
0.45Ba0.45Sr0.55TiO3 - 0.55[0.8Mg2TiO4 - 0.2MgO]	ceramic	0.45	1400	10k		12			165.3		8	0.00105	61
0.45Ba0.45Sr0.55TiO3 - 0.55[0.8Mg2TiO4 - 0.2MgO]	ceramic	0.45	1400	10k		13			165.3		8.8	0.00105	61
0.45Ba0.45Sr0.55TiO3 - 0.55[0.8Mg2TiO4 - 0.2MgO]	ceramic	0.45	1400	10k		13.9			165.3		9.6	0.00105	61
0.45Ba0.45Sr0.55TiO3 - 0.55[0.8Mg2TiO4 - 0.2MgO]	ceramic	0.45	1400	10k		14.9			165.3		10.4	0.00105	61
0.45Ba0.45Sr0.55TiO3 - 0.55[0.8Mg2TiO4 - 0.2MgO]	ceramic	0.45	1400	10k		15.8			165.3		11	0.00105	61
0.45Ba0.45Sr0.55TiO3 - 0.55[0.8Mg2TiO4 - 0.2MgO]	ceramic	0.45	1400	10k		16.7			165.3		11.8	0.00105	61
0.45Ba0.45Sr0.55TiO3 - 0.55[0.8Mg2TiO4 - 0.2MgO]	ceramic	0.45	1400	10k		17.6			165.3		12.5	0.00105	61
0.45Ba0.45Sr0.55TiO3 - 0.55[0.8Mg2TiO4 - 0.2MgO]	ceramic	0.45	1400	10k		18.5			165.3		13.2	0.00105	61
0.45Ba0.45Sr0.55TiO3 - 0.55[0.8Mg2TiO4 - 0.2MgO]	ceramic	0.45	1400	10k		19.5			165.3		13.6	0.00105	61
0.45Ba0.45Sr0.55TiO3 - 0.55[0.8Mg2TiO4 - 0.2MgO]	ceramic	0.45	1400	10k		20			165.3		14	0.00105	61
0.45Ba0.45Sr0.55TiO3 - 0.55[0.8Mg2TiO4 - 0.2MgO]	ceramic	0.45	1400	10k		20.5			165.3		14.3	0.00105	61
0.45Ba0.45Sr0.55TiO3 - 0.55[0.8Mg2TiO4 - 0.2MgO]	ceramic	0.45	1400	10k		21.3			165.3		14.8	0.00105	61
0.45Ba0.45Sr0.55TiO3 - 0.55[0.8Mg2TiO4 - 0.2MgO]	ceramic	0.45	1400	10k		22.2			165.3		15.3	0.00105	61
0.4Ba0.45Sr0.55TiO3 - 0.6[0.8Mg2TiO4 - 0.2MgO]	ceramic	0.45	1400	10k		3			126.23		1.7	0.00092	61
0.4Ba0.45Sr0.55TiO3 - 0.6[0.8Mg2TiO4 - 0.2MgO]	ceramic	0.45	1400	10k		3.9			126.23		2.3	0.00092	61
0.4Ba0.45Sr0.55TiO3 - 0.6[0.8Mg2TiO4 - 0.2MgO]	ceramic	0.45	1400	10k		4.9			126.23		2.8	0.00092	61
0.4Ba0.45Sr0.55TiO3 - 0.6[0.8Mg2TiO4 - 0.2MgO]	ceramic	0.45	1400	10k		6			126.23		3.2	0.00092	61
0.4Ba0.45Sr0.55TiO3 - 0.6[0.8Mg2TiO4 - 0.2MgO]	ceramic	0.45	1400	10k		6.9			126.23		3.8	0.00092	61
0.4Ba0.45Sr0.55TiO3 - 0.6[0.8Mg2TiO4 - 0.2MgO]	ceramic	0.45	1400	10k		7.9			126.23		4.2	0.00092	61
0.4Ba0.45Sr0.55TiO3 - 0.6[0.8Mg2TiO4 - 0.2MgO]	ceramic	0.45	1400	10k		9			126.23		4.7	0.00092	61
0.4Ba0.45Sr0.55TiO3 - 0.6[0.8Mg2TiO4 - 0.2MgO]	ceramic	0.45	1400	10k		10			126.23		5.4	0.00092	61
0.4Ba0.45Sr0.55TiO3 - 0.6[0.8Mg2TiO4 - 0.2MgO]	ceramic	0.45	1400	10k		10.9			126.23		6.1	0.00092	61
0.4Ba0.45Sr0.55TiO3 - 0.6[0.8Mg2TiO4 - 0.2MgO]	ceramic	0.45	1400	10k		12			126.23		6.7	0.00092	61
0.4Ba0.45Sr0.55TiO3 - 0.6[0.8Mg2TiO4 - 0.2MgO]	ceramic	0.45	1400	10k		13			126.23		7.4	0.00092	61
0.4Ba0.45Sr0.55TiO3 - 0.6[0.8Mg2TiO4 - 0.2MgO]	ceramic	0.45	1400	10k		13.9			126.23		8.1	0.00092	61
0.4Ba0.45Sr0.55TiO3 - 0.6[0.8Mg2TiO4 - 0.2MgO]	ceramic	0.45	1400	10k		15			126.23		8.8	0.00092	61
0.4Ba0.45Sr0.55TiO3 - 0.6[0.8Mg2TiO4 - 0.2MgO]	ceramic	0.45	1400	10k		15.9			126.23		9.5	0.00092	61
0.4Ba0.45Sr0.55TiO3 - 0.6[0.8Mg2TiO4 - 0.2MgO]	ceramic	0.45	1400	10k		16.9			126.23		10.4	0.00092	61
0.4Ba0.45Sr0.55TiO3 - 0.6[0.8Mg2TiO4 - 0.2MgO]	ceramic	0.45	1400	10k		17.9			126.23		11.3	0.00092	61
0.4Ba0.45Sr0.55TiO3 - 0.6[0.8Mg2TiO4 - 0.2MgO]	ceramic	0.45	1400	10k		18.8			126.23		12.1	0.00092	61
0.4Ba0.45Sr0.55TiO3 - 0.6[0.8Mg2TiO4 - 0.2MgO]	ceramic	0.45	1400	10k		19.9			126.23		12.9	0.00092	61
0.4Ba0.45Sr0.55TiO3 - 0.6[0.8Mg2TiO4 - 0.2MgO]	ceramic	0.45	1400	10k		20.9			126.23		13.6	0.00092	61
0.4Ba0.45Sr0.55TiO3 - 0.6[0.8Mg2TiO4 - 0.2MgO]	ceramic	0.45	1400	10k		22			126.23		14.3	0.00092	61
0.4Ba0.45Sr0.55TiO3 - 0.6[0.8Mg2TiO4 - 0.2MgO]	ceramic	0.45	1400	10k		22.9			126.23		14.8	0.00092	61
0.4Ba0.45Sr0.55TiO3 - 0.6[0.8Mg2TiO4 - 0.2MgO]	ceramic	0.45	1400	10k		23.9			126.23		15.2	0.00092	61
0.4Ba0.45Sr0.55TiO3 - 0.6[0.8Mg2TiO4 - 0.2MgO]	ceramic	0.45	1400	10k		25			126.23		15.8	0.00092	61
0.35Ba0.45Sr0.55TiO3 - 0.65[0.8Mg2TiO4 - 0.2MgO]	ceramic	0.45	1400	10k		4.9			95.7		1.9	0.00075	61
0.35Ba0.45Sr0.55TiO3 - 0.65[0.8Mg2TiO4 - 0.2MgO]	ceramic	0.45	1400	10k		5.8			95.7		2.5	0.00075	61
0.35Ba0.45Sr0.55TiO3 - 0.65[0.8Mg2TiO4 - 0.2MgO]	ceramic	0.45	1400	10k		6.7			95.7		3.3	0.00075	61
0.35Ba0.45Sr0.55TiO3 - 0.65[0.8Mg2TiO4 - 0.2MgO]	ceramic	0.45	1400	10k		7.8			95.7		4	0.00075	61
0.35Ba0.45Sr0.55TiO3 - 0.65[0.8Mg2TiO4 - 0.2MgO]	ceramic	0.45	1400	10k		8.7			95.7		4.8	0.00075	61
0.35Ba0.45Sr0.55TiO3 - 0.65[0.8Mg2TiO4 - 0.2MgO]	ceramic	0.45	1400	10k		9.7			95.7		5.6	0.00075	61
0.35Ba0.45Sr0.55TiO3 - 0.65[0.8Mg2TiO4 - 0.2MgO]	ceramic	0.45	1400	10k		10			95.7		6	0.00075	61
0.35Ba0.45Sr0.55TiO3 - 0.65[0.8Mg2TiO4 - 0.2MgO]	ceramic	0.45	1400	10k		10.7			95.7		6.5	0.00075	61
0.35Ba0.45Sr0.55TiO3 - 0.65[0.8Mg2TiO4 - 0.2MgO]	ceramic	0.45	1400	10k		11.6			95.7		7.2	0.00075	61
0.35Ba0.45Sr0.55TiO3 - 0.65[0.8Mg2TiO4 - 0.2MgO]	ceramic	0.45	1400	10k		12.6			95.7		7.9	0.00075	61
0.35Ba0.45Sr0.55TiO3 - 0.65[0.8Mg2TiO4 - 0.2MgO]	ceramic	0.45	1400	10k		13.6			95.7		8.5	0.00075	61
0.35Ba0.45Sr0.55TiO3 - 0.65[0.8Mg2TiO4 - 0.2MgO]	ceramic	0.45	1400	10k		14.6			95.7		9	0.00075	61
0.35Ba0.45Sr0.55TiO3 - 0.65[0.8Mg2TiO4 - 0.2MgO]	ceramic	0.45	1400	10k		15.6			95.7		9.6	0.00075	61
0.35Ba0.45Sr0.55TiO3 - 0.65[0.8Mg2TiO4 - 0.2MgO]	ceramic	0.45	1400	10k		16.5			95.7		10.2	0.00075	61
0.35Ba0.45Sr0.55TiO3 - 0.65[0.8Mg2TiO4 - 0.2MgO]	ceramic	0.45	1400	10k		17.4			95.7		10.6	0.00075	61
0.35Ba0.45Sr0.55TiO3 - 0.65[0.8Mg2TiO4 - 0.2MgO]	ceramic	0.45	1400	10k		18.5			95.7		11.2	0.00075	61
0.35Ba0.45Sr0.55TiO3 - 0.65[0.8Mg2TiO4 - 0.2MgO]	ceramic	0.45	1400	10k		19.4			95.7		11.7	0.00075	61
0.35Ba0.45Sr0.55TiO3 - 0.65[0.8Mg2TiO4 - 0.2MgO]	ceramic	0.45	1400	10k		19.9			95.7		12	0.00075	61
0.35Ba0.45Sr0.55TiO3 - 0.65[0.8Mg2TiO4 - 0.2MgO]	ceramic	0.45	1400	10k		20.5			95.7		12.3	0.00075	61
0.35Ba0.45Sr0.55TiO3 - 0.65[0.8Mg2TiO4 - 0.2MgO]	ceramic	0.45	1400	10k		21.4			95.7		12.8	0.00075	61
0.7Ba0.45Sr0.55TiO3 - 0.3[0.5Mg2TiO4 - 0.5MgO]	ceramic	0.45	1400	10k		4.8			432.3		0.03	0.0011	61
0.7Ba0.45Sr0.55TiO3 - 0.3[0.5Mg2TiO4 - 0.5MgO]	ceramic	0.45	1400	10k		5.6			432.3		0.3	0.0011	61
0.7Ba0.45Sr0.55TiO3 - 0.3[0.5Mg2TiO4 - 0.5MgO]	ceramic	0.45	1400	10k		6.6			432.3		0.5	0.0011	61
0.7Ba0.45Sr0.55TiO3 - 0.3[0.5Mg2TiO4 - 0.5MgO]	ceramic	0.45	1400	10k		7.6			432.3		0.8	0.0011	61
0.7Ba0.45Sr0.55TiO3 - 0.3[0.5Mg2TiO4 - 0.5MgO]	ceramic	0.45	1400	10k		8.5			432.3		1.2	0.0011	61
0.7Ba0.45Sr0.55TiO3 - 0.3[0.5Mg2TiO4 - 0.5MgO]	ceramic	0.45	1400	10k		9.5			432.3		1.7	0.0011	61
0.7Ba0.45Sr0.55TiO3 - 0.3[0.5Mg2TiO4 - 0.5MgO]	ceramic	0.45	1400	10k		10			432.3		2.1	0.0011	61
0.7Ba0.45Sr0.55TiO3 - 0.3[0.5Mg2TiO4 - 0.5MgO]	ceramic	0.45	1400	10k		10.4			432.3		2.3	0.0011	61
0.7Ba0.45Sr0.55TiO3 - 0.3[0.5Mg2TiO4 - 0.5MgO]	ceramic	0.45	1400	10k		11.5			432.3		2.8	0.0011	61
0.7Ba0.45Sr0.55TiO3 - 0.3[0.5Mg2TiO4 - 0.5MgO]	ceramic	0.45	1400	10k		12.3			432.3		3.1	0.0011	61
0.7Ba0.45Sr0.55TiO3 - 0.3[0.5Mg2TiO4 - 0.5MgO]	ceramic	0.45	1400	10k		13.3			432.3		3.5	0.0011	61
0.7Ba0.45Sr0.55TiO3 - 0.3[0.5Mg2TiO4 - 0.5MgO]	ceramic	0.45	1400	10k		14.3			432.3		4	0.0011	61
0.7Ba0.45Sr0.55TiO3 - 0.3[0.5Mg2TiO4 - 0.5MgO]	ceramic	0.45	1400	10k		15.2			432.3		4.4	0.0011	61
0.7Ba0.45Sr0.55TiO3 - 0.3[0.5Mg2TiO4 - 0.5MgO]	ceramic	0.45	1400	10k		16.1			432.3		4.9	0.0011	61
0.7Ba0.45Sr0.55TiO3 - 0.3[0.5Mg2TiO4 - 0.5MgO]	ceramic	0.45	1400	10k		17.2			432.3		5.4	0.0011	61
0.7Ba0.45Sr0.55TiO3 - 0.3[0.5Mg2TiO4 - 0.5MgO]	ceramic	0.45	1400	10k		18.1			432.3		6	0.0011	61
0.7Ba0.45Sr0.55TiO3 - 0.3[0.5Mg2TiO4 - 0.5MgO]	ceramic	0.45	1400	10k		19			432.3		6.4	0.0011	61
0.7Ba0.45Sr0.55TiO3 - 0.3[0.5Mg2TiO4 - 0.5MgO]	ceramic	0.45	1400	10k		20			432.3		6.9	0.0011	61
0.7Ba0.45Sr0.55TiO3 - 0.3[0.5Mg2TiO4 - 0.5MgO]	ceramic	0.45	1400	10k		21			432.3		7.2	0.0011	61
0.7Ba0.45Sr0.55TiO3 - 0.3[0.5Mg2TiO4 - 0.5MgO]	ceramic	0.45	1400	10k		21.9			432.3		7.6	0.0011	61
0.7Ba0.45Sr0.55TiO3 - 0.3[0.5Mg2TiO4 - 0.5MgO]	ceramic	0.45	1400	10k		22.9			432.3		7.9	0.0011	61
0.55Ba0.45Sr0.55TiO3 - 0.45[0.5Mg2TiO4 - 0.5MgO]	ceramic	0.45	1400	10k		2.8			240		0.5	0.0012	61
0.55Ba0.45Sr0.55TiO3 - 0.45[0.5Mg2TiO4 - 0.5MgO]	ceramic	0.45	1400	10k		3.8			240		0.8	0.0012	61
0.55Ba0.45Sr0.55TiO3 - 0.45[0.5Mg2TiO4 - 0.5MgO]	ceramic	0.45	1400	10k		4.8			240		1.2	0.0012	61
0.55Ba0.45Sr0.55TiO3 - 0.45[0.5Mg2TiO4 - 0.5MgO]	ceramic	0.45	1400	10k		5.7			240		1.4	0.0012	61
0.55Ba0.45Sr0.55TiO3 - 0.45[0.5Mg2TiO4 - 0.5MgO]	ceramic	0.45	1400	10k		6.6			240		1.7	0.0012	61
0.55Ba0.45Sr0.55TiO3 - 0.45[0.5Mg2TiO4 - 0.5MgO]	ceramic	0.45	1400	10k		7.6			240		2.3	0.0012	61
0.55Ba0.45Sr0.55TiO3 - 0.45[0.5Mg2TiO4 - 0.5MgO]	ceramic	0.45	1400	10k		8.5			240		2.6	0.0012	61
0.55Ba0.45Sr0.55TiO3 - 0.45[0.5Mg2TiO4 - 0.5MgO]	ceramic	0.45	1400	10k		9.5			240		3.3	0.0012	61
0.55Ba0.45Sr0.55TiO3 - 0.45[0.5Mg2TiO4 - 0.5MgO]	ceramic	0.45	1400	10k		10			240		3.5	0.0012	61
0.55Ba0.45Sr0.55TiO3 - 0.45[0.5Mg2TiO4 - 0.5MgO]	ceramic	0.45	1400	10k		10.5			240		3.9	0.0012	61
0.55Ba0.45Sr0.55TiO3 - 0.45[0.5Mg2TiO4 - 0.5MgO]	ceramic	0.45	1400	10k		11.5			240		4.4	0.0012	61
0.55Ba0.45Sr0.55TiO3 - 0.45[0.5Mg2TiO4 - 0.5MgO]	ceramic	0.45	1400	10k		12.3			240		4.8	0.0012	61
0.55Ba0.45Sr0.55TiO3 - 0.45[0.5Mg2TiO4 - 0.5MgO]	ceramic	0.45	1400	10k		13.3			240		5.3	0.0012	61
0.55Ba0.45Sr0.55TiO3 - 0.45[0.5Mg2TiO4 - 0.5MgO]	ceramic	0.45	1400	10k		14.3			240		5.8	0.0012	61
0.55Ba0.45Sr0.55TiO3 - 0.45[0.5Mg2TiO4 - 0.5MgO]	ceramic	0.45	1400	10k		15.2			240		6.2	0.0012	61
0.55Ba0.45Sr0.55TiO3 - 0.45[0.5Mg2TiO4 - 0.5MgO]	ceramic	0.45	1400	10k		16.2			240		6.7	0.0012	61
0.55Ba0.45Sr0.55TiO3 - 0.45[0.5Mg2TiO4 - 0.5MgO]	ceramic	0.45	1400	10k		17.1			240		7	0.0012	61
0.55Ba0.45Sr0.55TiO3 - 0.45[0.5Mg2TiO4 - 0.5MgO]	ceramic	0.45	1400	10k		18.1			240		7.5	0.0012	61
0.55Ba0.45Sr0.55TiO3 - 0.45[0.5Mg2TiO4 - 0.5MgO]	ceramic	0.45	1400	10k		19			240		8	0.0012	61
0.55Ba0.45Sr0.55TiO3 - 0.45[0.5Mg2TiO4 - 0.5MgO]	ceramic	0.45	1400	10k		20			240		8.5	0.0012	61
0.55Ba0.45Sr0.55TiO3 - 0.45[0.5Mg2TiO4 - 0.5MgO]	ceramic	0.45	1400	10k		20.9			240		8.9	0.0012	61
0.55Ba0.45Sr0.55TiO3 - 0.45[0.5Mg2TiO4 - 0.5MgO]	ceramic	0.45	1400	10k		21.9			240		9.4	0.0012	61
0.55Ba0.45Sr0.55TiO3 - 0.45[0.5Mg2TiO4 - 0.5MgO]	ceramic	0.45	1400	10k		22.9			240		9.8	0.0012	61
0.55Ba0.45Sr0.55TiO3 - 0.45[0.5Mg2TiO4 - 0.5MgO]	ceramic	0.45	1400	10k		23.8			240		10.3	0.0012	61
0.5Ba0.45Sr0.55TiO3 - 0.5[0.5Mg2TiO4 - 0.5MgO]	ceramic	0.45	1400	10k		1			192.2		0.5	0.00168	61
0.5Ba0.45Sr0.55TiO3 - 0.5[0.5Mg2TiO4 - 0.5MgO]	ceramic	0.45	1400	10k		2			192.2		0.8	0.00168	61
0.5Ba0.45Sr0.55TiO3 - 0.5[0.5Mg2TiO4 - 0.5MgO]	ceramic	0.45	1400	10k		3			192.2		1.1	0.00168	61
0.5Ba0.45Sr0.55TiO3 - 0.5[0.5Mg2TiO4 - 0.5MgO]	ceramic	0.45	1400	10k		4			192.2		1.4	0.00168	61
0.5Ba0.45Sr0.55TiO3 - 0.5[0.5Mg2TiO4 - 0.5MgO]	ceramic	0.45	1400	10k		5			192.2		1.8	0.00168	61
0.5Ba0.45Sr0.55TiO3 - 0.5[0.5Mg2TiO4 - 0.5MgO]	ceramic	0.45	1400	10k		6			192.2		2.2	0.00168	61
0.5Ba0.45Sr0.55TiO3 - 0.5[0.5Mg2TiO4 - 0.5MgO]	ceramic	0.45	1400	10k		7			192.2		2.4	0.00168	61
0.5Ba0.45Sr0.55TiO3 - 0.5[0.5Mg2TiO4 - 0.5MgO]	ceramic	0.45	1400	10k		8			192.2		2.7	0.00168	61
0.5Ba0.45Sr0.55TiO3 - 0.5[0.5Mg2TiO4 - 0.5MgO]	ceramic	0.45	1400	10k		9			192.2		3.1	0.00168	61
0.5Ba0.45Sr0.55TiO3 - 0.5[0.5Mg2TiO4 - 0.5MgO]	ceramic	0.45	1400	10k		10			192.2		3.3	0.00168	61
0.5Ba0.45Sr0.55TiO3 - 0.5[0.5Mg2TiO4 - 0.5MgO]	ceramic	0.45	1400	10k		11			192.2		3.7	0.00168	61
0.5Ba0.45Sr0.55TiO3 - 0.5[0.5Mg2TiO4 - 0.5MgO]	ceramic	0.45	1400	10k		12			192.2		4.2	0.00168	61
0.5Ba0.45Sr0.55TiO3 - 0.5[0.5Mg2TiO4 - 0.5MgO]	ceramic	0.45	1400	10k		13			192.2		4.6	0.00168	61
0.5Ba0.45Sr0.55TiO3 - 0.5[0.5Mg2TiO4 - 0.5MgO]	ceramic	0.45	1400	10k		14			192.2		5.1	0.00168	61
0.5Ba0.45Sr0.55TiO3 - 0.5[0.5Mg2TiO4 - 0.5MgO]	ceramic	0.45	1400	10k		15			192.2		5.5	0.00168	61
0.5Ba0.45Sr0.55TiO3 - 0.5[0.5Mg2TiO4 - 0.5MgO]	ceramic	0.45	1400	10k		16			192.2		6	0.00168	61
0.5Ba0.45Sr0.55TiO3 - 0.5[0.5Mg2TiO4 - 0.5MgO]	ceramic	0.45	1400	10k		17			192.2		6.5	0.00168	61
0.5Ba0.45Sr0.55TiO3 - 0.5[0.5Mg2TiO4 - 0.5MgO]	ceramic	0.45	1400	10k		18			192.2		7	0.00168	61
0.5Ba0.45Sr0.55TiO3 - 0.5[0.5Mg2TiO4 - 0.5MgO]	ceramic	0.45	1400	10k		19			192.2		7.5	0.00168	61
0.5Ba0.45Sr0.55TiO3 - 0.5[0.5Mg2TiO4 - 0.5MgO]	ceramic	0.45	1400	10k		20			192.2		8	0.00168	61
0.5Ba0.45Sr0.55TiO3 - 0.5[0.5Mg2TiO4 - 0.5MgO]	ceramic	0.45	1400	10k		21			192.2		8.5	0.00168	61
0.5Ba0.45Sr0.55TiO3 - 0.5[0.5Mg2TiO4 - 0.5MgO]	ceramic	0.45	1400	10k		22			192.2		9.2	0.00168	61
0.5Ba0.45Sr0.55TiO3 - 0.5[0.5Mg2TiO4 - 0.5MgO]	ceramic	0.45	1400	10k		23			192.2		9.7	0.00168	61
0.5Ba0.45Sr0.55TiO3 - 0.5[0.5Mg2TiO4 - 0.5MgO]	ceramic	0.45	1400	10k		24			192.2		10	0.00168	61
0.5Ba0.45Sr0.55TiO3 - 0.5[0.5Mg2TiO4 - 0.5MgO]	ceramic	0.45	1400	10k		25			192.2		10.6	0.00168	61
0.5Ba0.45Sr0.55TiO3 - 0.5[0.5Mg2TiO4 - 0.5MgO]	ceramic	0.45	1400	10k		26			192.2		11.1	0.00168	61
0.5Ba0.45Sr0.55TiO3 - 0.5[0.5Mg2TiO4 - 0.5MgO]	ceramic	0.45	1400	10k		27			192.2		11.7	0.00168	61
0.5Ba0.45Sr0.55TiO3 - 0.5[0.5Mg2TiO4 - 0.5MgO]	ceramic	0.45	1400	10k		28			192.2		12.1	0.00168	61
0.45Ba0.45Sr0.55TiO3 - 0.55[0.5Mg2TiO4 - 0.5MgO]	ceramic	0.45	1400	10k		3			145.6		0.05	0.0011	61
0.45Ba0.45Sr0.55TiO3 - 0.55[0.5Mg2TiO4 - 0.5MgO]	ceramic	0.45	1400	10k		4			145.6		0.3	0.0011	61
0.45Ba0.45Sr0.55TiO3 - 0.55[0.5Mg2TiO4 - 0.5MgO]	ceramic	0.45	1400	10k		5			145.6		0.4	0.0011	61
0.45Ba0.45Sr0.55TiO3 - 0.55[0.5Mg2TiO4 - 0.5MgO]	ceramic	0.45	1400	10k		6			145.6		0.7	0.0011	61
0.45Ba0.45Sr0.55TiO3 - 0.55[0.5Mg2TiO4 - 0.5MgO]	ceramic	0.45	1400	10k		7			145.6		1.1	0.0011	61
0.45Ba0.45Sr0.55TiO3 - 0.55[0.5Mg2TiO4 - 0.5MgO]	ceramic	0.45	1400	10k		8			145.6		1.5	0.0011	61
0.45Ba0.45Sr0.55TiO3 - 0.55[0.5Mg2TiO4 - 0.5MgO]	ceramic	0.45	1400	10k		9			145.6		2	0.0011	61
0.45Ba0.45Sr0.55TiO3 - 0.55[0.5Mg2TiO4 - 0.5MgO]	ceramic	0.45	1400	10k		10			145.6		2.3	0.0011	61
0.45Ba0.45Sr0.55TiO3 - 0.55[0.5Mg2TiO4 - 0.5MgO]	ceramic	0.45	1400	10k		11			145.6		2.9	0.0011	61
0.45Ba0.45Sr0.55TiO3 - 0.55[0.5Mg2TiO4 - 0.5MgO]	ceramic	0.45	1400	10k		12			145.6		3.4	0.0011	61
0.45Ba0.45Sr0.55TiO3 - 0.55[0.5Mg2TiO4 - 0.5MgO]	ceramic	0.45	1400	10k		13			145.6		4.1	0.0011	61
0.45Ba0.45Sr0.55TiO3 - 0.55[0.5Mg2TiO4 - 0.5MgO]	ceramic	0.45	1400	10k		14			145.6		4.6	0.0011	61
0.45Ba0.45Sr0.55TiO3 - 0.55[0.5Mg2TiO4 - 0.5MgO]	ceramic	0.45	1400	10k		15			145.6		4.9	0.0011	61
0.45Ba0.45Sr0.55TiO3 - 0.55[0.5Mg2TiO4 - 0.5MgO]	ceramic	0.45	1400	10k		16			145.6		5.4	0.0011	61
0.45Ba0.45Sr0.55TiO3 - 0.55[0.5Mg2TiO4 - 0.5MgO]	ceramic	0.45	1400	10k		17			145.6		6	0.0011	61
0.45Ba0.45Sr0.55TiO3 - 0.55[0.5Mg2TiO4 - 0.5MgO]	ceramic	0.45	1400	10k		18			145.6		6.4	0.0011	61
0.45Ba0.45Sr0.55TiO3 - 0.55[0.5Mg2TiO4 - 0.5MgO]	ceramic	0.45	1400	10k		19			145.6		7.1	0.0011	61
0.45Ba0.45Sr0.55TiO3 - 0.55[0.5Mg2TiO4 - 0.5MgO]	ceramic	0.45	1400	10k		20			145.6		7.8	0.0011	61
0.45Ba0.45Sr0.55TiO3 - 0.55[0.5Mg2TiO4 - 0.5MgO]	ceramic	0.45	1400	10k		21			145.6		8.4	0.0011	61
0.45Ba0.45Sr0.55TiO3 - 0.55[0.5Mg2TiO4 - 0.5MgO]	ceramic	0.45	1400	10k		22			145.6		9	0.0011	61
0.45Ba0.45Sr0.55TiO3 - 0.55[0.5Mg2TiO4 - 0.5MgO]	ceramic	0.45	1400	10k		23			145.6		9.6	0.0011	61
0.4Ba0.45Sr0.55TiO3 - 0.6[0.5Mg2TiO4 - 0.5MgO]	ceramic	0.45	1400	10k		1.9			113.8		0.01	0.0009	61
0.4Ba0.45Sr0.55TiO3 - 0.6[0.5Mg2TiO4 - 0.5MgO]	ceramic	0.45	1400	10k		2.9			113.8		0.3	0.0009	61
0.4Ba0.45Sr0.55TiO3 - 0.6[0.5Mg2TiO4 - 0.5MgO]	ceramic	0.45	1400	10k		3.9			113.8		0.5	0.0009	61
0.4Ba0.45Sr0.55TiO3 - 0.6[0.5Mg2TiO4 - 0.5MgO]	ceramic	0.45	1400	10k		4.8			113.8		0.6	0.0009	61
0.4Ba0.45Sr0.55TiO3 - 0.6[0.5Mg2TiO4 - 0.5MgO]	ceramic	0.45	1400	10k		5.9			113.8		0.9	0.0009	61
0.4Ba0.45Sr0.55TiO3 - 0.6[0.5Mg2TiO4 - 0.5MgO]	ceramic	0.45	1400	10k		6.8			113.8		1.3	0.0009	61
0.4Ba0.45Sr0.55TiO3 - 0.6[0.5Mg2TiO4 - 0.5MgO]	ceramic	0.45	1400	10k		7.8			113.8		1.6	0.0009	61
0.4Ba0.45Sr0.55TiO3 - 0.6[0.5Mg2TiO4 - 0.5MgO]	ceramic	0.45	1400	10k		8.8			113.8		2.1	0.0009	61
0.4Ba0.45Sr0.55TiO3 - 0.6[0.5Mg2TiO4 - 0.5MgO]	ceramic	0.45	1400	10k		9.7			113.8		2.6	0.0009	61
0.4Ba0.45Sr0.55TiO3 - 0.6[0.5Mg2TiO4 - 0.5MgO]	ceramic	0.45	1400	10k		10			113.8		2.8	0.0009	61
0.4Ba0.45Sr0.55TiO3 - 0.6[0.5Mg2TiO4 - 0.5MgO]	ceramic	0.45	1400	10k		10.7			113.8		3.1	0.0009	61
0.4Ba0.45Sr0.55TiO3 - 0.6[0.5Mg2TiO4 - 0.5MgO]	ceramic	0.45	1400	10k		11.7			113.8		3.6	0.0009	61
0.4Ba0.45Sr0.55TiO3 - 0.6[0.5Mg2TiO4 - 0.5MgO]	ceramic	0.45	1400	10k		12.7			113.8		4	0.0009	61
0.4Ba0.45Sr0.55TiO3 - 0.6[0.5Mg2TiO4 - 0.5MgO]	ceramic	0.45	1400	10k		13.7			113.8		4.5	0.0009	61
0.4Ba0.45Sr0.55TiO3 - 0.6[0.5Mg2TiO4 - 0.5MgO]	ceramic	0.45	1400	10k		14.6			113.8		4.8	0.0009	61
0.4Ba0.45Sr0.55TiO3 - 0.6[0.5Mg2TiO4 - 0.5MgO]	ceramic	0.45	1400	10k		15.6			113.8		5.3	0.0009	61
0.4Ba0.45Sr0.55TiO3 - 0.6[0.5Mg2TiO4 - 0.5MgO]	ceramic	0.45	1400	10k		16.6			113.8		5.8	0.0009	61
0.4Ba0.45Sr0.55TiO3 - 0.6[0.5Mg2TiO4 - 0.5MgO]	ceramic	0.45	1400	10k		17.6			113.8		6.4	0.0009	61
0.4Ba0.45Sr0.55TiO3 - 0.6[0.5Mg2TiO4 - 0.5MgO]	ceramic	0.45	1400	10k		18.6			113.8		6.8	0.0009	61
0.4Ba0.45Sr0.55TiO3 - 0.6[0.5Mg2TiO4 - 0.5MgO]	ceramic	0.45	1400	10k		19.5			113.8		7.2	0.0009	61
0.4Ba0.45Sr0.55TiO3 - 0.6[0.5Mg2TiO4 - 0.5MgO]	ceramic	0.45	1400	10k		20			113.8		7.4	0.0009	61
0.4Ba0.45Sr0.55TiO3 - 0.6[0.5Mg2TiO4 - 0.5MgO]	ceramic	0.45	1400	10k		20.5			113.8		7.7	0.0009	61
0.4Ba0.45Sr0.55TiO3 - 0.6[0.5Mg2TiO4 - 0.5MgO]	ceramic	0.45	1400	10k		21.5			113.8		8	0.0009	61
0.4Ba0.45Sr0.55TiO3 - 0.6[0.5Mg2TiO4 - 0.5MgO]	ceramic	0.45	1400	10k		22.5			113.8		8.5	0.0009	61
0.35Ba0.45Sr0.55TiO3 - 0.65[0.5Mg2TiO4 - 0.5MgO]	ceramic	0.45	1400	10k		2.9			83.6		0.03	0.00078	61
0.35Ba0.45Sr0.55TiO3 - 0.65[0.5Mg2TiO4 - 0.5MgO]	ceramic	0.45	1400	10k		3.9			83.6		0.2	0.00078	61
0.35Ba0.45Sr0.55TiO3 - 0.65[0.5Mg2TiO4 - 0.5MgO]	ceramic	0.45	1400	10k		4.9			83.6		0.6	0.00078	61
0.35Ba0.45Sr0.55TiO3 - 0.65[0.5Mg2TiO4 - 0.5MgO]	ceramic	0.45	1400	10k		6			83.6		0.8	0.00078	61
0.35Ba0.45Sr0.55TiO3 - 0.65[0.5Mg2TiO4 - 0.5MgO]	ceramic	0.45	1400	10k		6.9			83.6		1.1	0.00078	61
0.35Ba0.45Sr0.55TiO3 - 0.65[0.5Mg2TiO4 - 0.5MgO]	ceramic	0.45	1400	10k		8			83.6		1.6	0.00078	61
0.35Ba0.45Sr0.55TiO3 - 0.65[0.5Mg2TiO4 - 0.5MgO]	ceramic	0.45	1400	10k		8.9			83.6		2	0.00078	61
0.35Ba0.45Sr0.55TiO3 - 0.65[0.5Mg2TiO4 - 0.5MgO]	ceramic	0.45	1400	10k		10			83.6		2.4	0.00078	61
0.35Ba0.45Sr0.55TiO3 - 0.65[0.5Mg2TiO4 - 0.5MgO]	ceramic	0.45	1400	10k		11			83.6		2.8	0.00078	61
0.35Ba0.45Sr0.55TiO3 - 0.65[0.5Mg2TiO4 - 0.5MgO]	ceramic	0.45	1400	10k		12			83.6		3.3	0.00078	61
0.35Ba0.45Sr0.55TiO3 - 0.65[0.5Mg2TiO4 - 0.5MgO]	ceramic	0.45	1400	10k		13			83.6		3.7	0.00078	61
0.35Ba0.45Sr0.55TiO3 - 0.65[0.5Mg2TiO4 - 0.5MgO]	ceramic	0.45	1400	10k		14			83.6		4.2	0.00078	61
0.35Ba0.45Sr0.55TiO3 - 0.65[0.5Mg2TiO4 - 0.5MgO]	ceramic	0.45	1400	10k		15			83.6		4.7	0.00078	61
0.35Ba0.45Sr0.55TiO3 - 0.65[0.5Mg2TiO4 - 0.5MgO]	ceramic	0.45	1400	10k		16			83.6		5.1	0.00078	61
0.35Ba0.45Sr0.55TiO3 - 0.65[0.5Mg2TiO4 - 0.5MgO]	ceramic	0.45	1400	10k		17			83.6		5.6	0.00078	61
0.35Ba0.45Sr0.55TiO3 - 0.65[0.5Mg2TiO4 - 0.5MgO]	ceramic	0.45	1400	10k		18			83.6		6.1	0.00078	61
0.35Ba0.45Sr0.55TiO3 - 0.65[0.5Mg2TiO4 - 0.5MgO]	ceramic	0.45	1400	10k		19			83.6		6.8	0.00078	61
0.35Ba0.45Sr0.55TiO3 - 0.65[0.5Mg2TiO4 - 0.5MgO]	ceramic	0.45	1400	10k		20			83.6		7.3	0.00078	61
0.35Ba0.45Sr0.55TiO3 - 0.65[0.5Mg2TiO4 - 0.5MgO]	ceramic	0.45	1400	10k		21			83.6		7.8	0.00078	61
0.35Ba0.45Sr0.55TiO3 - 0.65[0.5Mg2TiO4 - 0.5MgO]	ceramic	0.45	1400	10k		22			83.6		8.2	0.00078	61
0.35Ba0.45Sr0.55TiO3 - 0.65[0.5Mg2TiO4 - 0.5MgO]	ceramic	0.45	1400	10k		23			83.6		8.7	0.00078	61
0.7Ba0.45Sr0.55TiO3 - 0.3[0.2Mg2TiO4 - 0.8MgO]	ceramic	0.45	1400	10k		4.3			360		0.6	0.00098	61
0.7Ba0.45Sr0.55TiO3 - 0.3[0.2Mg2TiO4 - 0.8MgO]	ceramic	0.45	1400	10k		5.3			360		1	0.00098	61
0.7Ba0.45Sr0.55TiO3 - 0.3[0.2Mg2TiO4 - 0.8MgO]	ceramic	0.45	1400	10k		6.3			360		1.4	0.00098	61
0.7Ba0.45Sr0.55TiO3 - 0.3[0.2Mg2TiO4 - 0.8MgO]	ceramic	0.45	1400	10k		7.4			360		1.8	0.00098	61
0.7Ba0.45Sr0.55TiO3 - 0.3[0.2Mg2TiO4 - 0.8MgO]	ceramic	0.45	1400	10k		8.4			360		2.3	0.00098	61
0.7Ba0.45Sr0.55TiO3 - 0.3[0.2Mg2TiO4 - 0.8MgO]	ceramic	0.45	1400	10k		9.5			360		2.7	0.00098	61
0.7Ba0.45Sr0.55TiO3 - 0.3[0.2Mg2TiO4 - 0.8MgO]	ceramic	0.45	1400	10k		10			360		3	0.00098	61
0.7Ba0.45Sr0.55TiO3 - 0.3[0.2Mg2TiO4 - 0.8MgO]	ceramic	0.45	1400	10k		10.6			360		3.4	0.00098	61
0.7Ba0.45Sr0.55TiO3 - 0.3[0.2Mg2TiO4 - 0.8MgO]	ceramic	0.45	1400	10k		11.6			360		3.8	0.00098	61
0.7Ba0.45Sr0.55TiO3 - 0.3[0.2Mg2TiO4 - 0.8MgO]	ceramic	0.45	1400	10k		12.6			360		4.2	0.00098	61
0.7Ba0.45Sr0.55TiO3 - 0.3[0.2Mg2TiO4 - 0.8MgO]	ceramic	0.45	1400	10k		13.7			360		4.6	0.00098	61
0.7Ba0.45Sr0.55TiO3 - 0.3[0.2Mg2TiO4 - 0.8MgO]	ceramic	0.45	1400	10k		14.8			360		5.1	0.00098	61
0.7Ba0.45Sr0.55TiO3 - 0.3[0.2Mg2TiO4 - 0.8MgO]	ceramic	0.45	1400	10k		15.8			360		5.5	0.00098	61
0.7Ba0.45Sr0.55TiO3 - 0.3[0.2Mg2TiO4 - 0.8MgO]	ceramic	0.45	1400	10k		16.9			360		5.8	0.00098	61
0.7Ba0.45Sr0.55TiO3 - 0.3[0.2Mg2TiO4 - 0.8MgO]	ceramic	0.45	1400	10k		17.9			360		6.3	0.00098	61
0.7Ba0.45Sr0.55TiO3 - 0.3[0.2Mg2TiO4 - 0.8MgO]	ceramic	0.45	1400	10k		18.9			360		6.7	0.00098	61
0.7Ba0.45Sr0.55TiO3 - 0.3[0.2Mg2TiO4 - 0.8MgO]	ceramic	0.45	1400	10k		20			360		7.1	0.00098	61
0.55Ba0.45Sr0.55TiO3 - 0.45[0.2Mg2TiO4 - 0.8MgO]	ceramic	0.45	1400	10k		2.2			198.5		0.3	0.0014	61
0.55Ba0.45Sr0.55TiO3 - 0.45[0.2Mg2TiO4 - 0.8MgO]	ceramic	0.45	1400	10k		3.3			198.5		0.8	0.0014	61
0.55Ba0.45Sr0.55TiO3 - 0.45[0.2Mg2TiO4 - 0.8MgO]	ceramic	0.45	1400	10k		4.3			198.5		1.2	0.0014	61
0.55Ba0.45Sr0.55TiO3 - 0.45[0.2Mg2TiO4 - 0.8MgO]	ceramic	0.45	1400	10k		5.4			198.5		1.7	0.0014	61
0.55Ba0.45Sr0.55TiO3 - 0.45[0.2Mg2TiO4 - 0.8MgO]	ceramic	0.45	1400	10k		6.5			198.5		2.4	0.0014	61
0.55Ba0.45Sr0.55TiO3 - 0.45[0.2Mg2TiO4 - 0.8MgO]	ceramic	0.45	1400	10k		7.6			198.5		3	0.0014	61
0.55Ba0.45Sr0.55TiO3 - 0.45[0.2Mg2TiO4 - 0.8MgO]	ceramic	0.45	1400	10k		8.7			198.5		3.6	0.0014	61
0.55Ba0.45Sr0.55TiO3 - 0.45[0.2Mg2TiO4 - 0.8MgO]	ceramic	0.45	1400	10k		9.7			198.5		4.1	0.0014	61
0.55Ba0.45Sr0.55TiO3 - 0.45[0.2Mg2TiO4 - 0.8MgO]	ceramic	0.45	1400	10k		10			198.5		4.4	0.0014	61
0.55Ba0.45Sr0.55TiO3 - 0.45[0.2Mg2TiO4 - 0.8MgO]	ceramic	0.45	1400	10k		10.9			198.5		4.7	0.0014	61
0.55Ba0.45Sr0.55TiO3 - 0.45[0.2Mg2TiO4 - 0.8MgO]	ceramic	0.45	1400	10k		11.9			198.5		5.3	0.0014	61
0.55Ba0.45Sr0.55TiO3 - 0.45[0.2Mg2TiO4 - 0.8MgO]	ceramic	0.45	1400	10k		13			198.5		5.7	0.0014	61
0.55Ba0.45Sr0.55TiO3 - 0.45[0.2Mg2TiO4 - 0.8MgO]	ceramic	0.45	1400	10k		14.1			198.5		6.2	0.0014	61
0.55Ba0.45Sr0.55TiO3 - 0.45[0.2Mg2TiO4 - 0.8MgO]	ceramic	0.45	1400	10k		15.2			198.5		6.7	0.0014	61
0.55Ba0.45Sr0.55TiO3 - 0.45[0.2Mg2TiO4 - 0.8MgO]	ceramic	0.45	1400	10k		16.2			198.5		7.2	0.0014	61
0.55Ba0.45Sr0.55TiO3 - 0.45[0.2Mg2TiO4 - 0.8MgO]	ceramic	0.45	1400	10k		17.3			198.5		7.7	0.0014	61
0.55Ba0.45Sr0.55TiO3 - 0.45[0.2Mg2TiO4 - 0.8MgO]	ceramic	0.45	1400	10k		18.4			198.5		8.1	0.0014	61
0.55Ba0.45Sr0.55TiO3 - 0.45[0.2Mg2TiO4 - 0.8MgO]	ceramic	0.45	1400	10k		19.5			198.5		8.5	0.0014	61
0.55Ba0.45Sr0.55TiO3 - 0.45[0.2Mg2TiO4 - 0.8MgO]	ceramic	0.45	1400	10k		20			198.5		8.7	0.0014	61
0.5Ba0.45Sr0.55TiO3 - 0.5[0.2Mg2TiO4 - 0.8MgO]	ceramic	0.45	1400	10k		3.2			163		0.6	0.0018	61
0.5Ba0.45Sr0.55TiO3 - 0.5[0.2Mg2TiO4 - 0.8MgO]	ceramic	0.45	1400	10k		4.3			163		1	0.0018	61
0.5Ba0.45Sr0.55TiO3 - 0.5[0.2Mg2TiO4 - 0.8MgO]	ceramic	0.45	1400	10k		5.3			163		1.6	0.0018	61
0.5Ba0.45Sr0.55TiO3 - 0.5[0.2Mg2TiO4 - 0.8MgO]	ceramic	0.45	1400	10k		6.3			163		2.1	0.0018	61
0.5Ba0.45Sr0.55TiO3 - 0.5[0.2Mg2TiO4 - 0.8MgO]	ceramic	0.45	1400	10k		7.4			163		2.6	0.0018	61
0.5Ba0.45Sr0.55TiO3 - 0.5[0.2Mg2TiO4 - 0.8MgO]	ceramic	0.45	1400	10k		8.4			163		3.1	0.0018	61
0.5Ba0.45Sr0.55TiO3 - 0.5[0.2Mg2TiO4 - 0.8MgO]	ceramic	0.45	1400	10k		9.5			163		3.8	0.0018	61
0.5Ba0.45Sr0.55TiO3 - 0.5[0.2Mg2TiO4 - 0.8MgO]	ceramic	0.45	1400	10k		10			163		4.1	0.0018	61
0.5Ba0.45Sr0.55TiO3 - 0.5[0.2Mg2TiO4 - 0.8MgO]	ceramic	0.45	1400	10k		10.6			163		4.3	0.0018	61
0.5Ba0.45Sr0.55TiO3 - 0.5[0.2Mg2TiO4 - 0.8MgO]	ceramic	0.45	1400	10k		11.6			163		4.7	0.0018	61
0.5Ba0.45Sr0.55TiO3 - 0.5[0.2Mg2TiO4 - 0.8MgO]	ceramic	0.45	1400	10k		12.6			163		5.1	0.0018	61
0.5Ba0.45Sr0.55TiO3 - 0.5[0.2Mg2TiO4 - 0.8MgO]	ceramic	0.45	1400	10k		13.7			163		5.5	0.0018	61
0.5Ba0.45Sr0.55TiO3 - 0.5[0.2Mg2TiO4 - 0.8MgO]	ceramic	0.45	1400	10k		14.8			163		6	0.0018	61
0.5Ba0.45Sr0.55TiO3 - 0.5[0.2Mg2TiO4 - 0.8MgO]	ceramic	0.45	1400	10k		15.8			163		6.4	0.0018	61
0.5Ba0.45Sr0.55TiO3 - 0.5[0.2Mg2TiO4 - 0.8MgO]	ceramic	0.45	1400	10k		16.9			163		6.8	0.0018	61
0.5Ba0.45Sr0.55TiO3 - 0.5[0.2Mg2TiO4 - 0.8MgO]	ceramic	0.45	1400	10k		17.9			163		7.1	0.0018	61
0.5Ba0.45Sr0.55TiO3 - 0.5[0.2Mg2TiO4 - 0.8MgO]	ceramic	0.45	1400	10k		19			163		7.5	0.0018	61
0.5Ba0.45Sr0.55TiO3 - 0.5[0.2Mg2TiO4 - 0.8MgO]	ceramic	0.45	1400	10k		20			163		7.9	0.0018	61
0.45Ba0.45Sr0.55TiO3 - 0.55[0.2Mg2TiO4 - 0.8MgO]	ceramic	0.45	1400	10k		2.9			125.6		0.3	0.00082	61
0.45Ba0.45Sr0.55TiO3 - 0.55[0.2Mg2TiO4 - 0.8MgO]	ceramic	0.45	1400	10k		3.8			125.6		0.7	0.00082	61
0.45Ba0.45Sr0.55TiO3 - 0.55[0.2Mg2TiO4 - 0.8MgO]	ceramic	0.45	1400	10k		4.8			125.6		1.2	0.00082	61
0.45Ba0.45Sr0.55TiO3 - 0.55[0.2Mg2TiO4 - 0.8MgO]	ceramic	0.45	1400	10k		5.7			125.6		1.7	0.00082	61
0.45Ba0.45Sr0.55TiO3 - 0.55[0.2Mg2TiO4 - 0.8MgO]	ceramic	0.45	1400	10k		6.7			125.6		2.2	0.00082	61
0.45Ba0.45Sr0.55TiO3 - 0.55[0.2Mg2TiO4 - 0.8MgO]	ceramic	0.45	1400	10k		7.7			125.6		2.7	0.00082	61
0.45Ba0.45Sr0.55TiO3 - 0.55[0.2Mg2TiO4 - 0.8MgO]	ceramic	0.45	1400	10k		8.6			125.6		3.2	0.00082	61
0.45Ba0.45Sr0.55TiO3 - 0.55[0.2Mg2TiO4 - 0.8MgO]	ceramic	0.45	1400	10k		9.6			125.6		3.8	0.00082	61
0.45Ba0.45Sr0.55TiO3 - 0.55[0.2Mg2TiO4 - 0.8MgO]	ceramic	0.45	1400	10k		10.1			125.6		4	0.00082	61
0.45Ba0.45Sr0.55TiO3 - 0.55[0.2Mg2TiO4 - 0.8MgO]	ceramic	0.45	1400	10k		10.4			125.6		4.2	0.00082	61
0.45Ba0.45Sr0.55TiO3 - 0.55[0.2Mg2TiO4 - 0.8MgO]	ceramic	0.45	1400	10k		11.4			125.6		4.7	0.00082	61
0.45Ba0.45Sr0.55TiO3 - 0.55[0.2Mg2TiO4 - 0.8MgO]	ceramic	0.45	1400	10k		12.4			125.6		5.2	0.00082	61
0.45Ba0.45Sr0.55TiO3 - 0.55[0.2Mg2TiO4 - 0.8MgO]	ceramic	0.45	1400	10k		13.3			125.6		5.7	0.00082	61
0.45Ba0.45Sr0.55TiO3 - 0.55[0.2Mg2TiO4 - 0.8MgO]	ceramic	0.45	1400	10k		14.3			125.6		6.3	0.00082	61
0.45Ba0.45Sr0.55TiO3 - 0.55[0.2Mg2TiO4 - 0.8MgO]	ceramic	0.45	1400	10k		15.2			125.6		6.6	0.00082	61
0.45Ba0.45Sr0.55TiO3 - 0.55[0.2Mg2TiO4 - 0.8MgO]	ceramic	0.45	1400	10k		16.2			125.6		6.9	0.00082	61
0.45Ba0.45Sr0.55TiO3 - 0.55[0.2Mg2TiO4 - 0.8MgO]	ceramic	0.45	1400	10k		17.1			125.6		7.2	0.00082	61
0.45Ba0.45Sr0.55TiO3 - 0.55[0.2Mg2TiO4 - 0.8MgO]	ceramic	0.45	1400	10k		18.1			125.6		7.6	0.00082	61
0.45Ba0.45Sr0.55TiO3 - 0.55[0.2Mg2TiO4 - 0.8MgO]	ceramic	0.45	1400	10k		19.1			125.6		8	0.00082	61
0.45Ba0.45Sr0.55TiO3 - 0.55[0.2Mg2TiO4 - 0.8MgO]	ceramic	0.45	1400	10k		20			125.6		8.4	0.00082	61
0.45Ba0.45Sr0.55TiO3 - 0.55[0.2Mg2TiO4 - 0.8MgO]	ceramic	0.45	1400	10k		20.9			125.6		8.7	0.00082	61
0.45Ba0.45Sr0.55TiO3 - 0.55[0.2Mg2TiO4 - 0.8MgO]	ceramic	0.45	1400	10k		21.9			125.6		9.1	0.00082	61
0.45Ba0.45Sr0.55TiO3 - 0.55[0.2Mg2TiO4 - 0.8MgO]	ceramic	0.45	1400	10k		22.8			125.6		9.2	0.00082	61
0.45Ba0.45Sr0.55TiO3 - 0.55[0.2Mg2TiO4 - 0.8MgO]	ceramic	0.45	1400	10k		23.8			125.6		9.7	0.00082	61
0.45Ba0.45Sr0.55TiO3 - 0.55[0.2Mg2TiO4 - 0.8MgO]	ceramic	0.45	1400	10k		24.8			125.6		10.1	0.00082	61
0.45Ba0.45Sr0.55TiO3 - 0.55[0.2Mg2TiO4 - 0.8MgO]	ceramic	0.45	1400	10k		25.7			125.6		10.4	0.00082	61
0.4Ba0.45Sr0.55TiO3 - 0.6[0.2Mg2TiO4 - 0.8MgO]	ceramic	0.45	1400	10k		3.4			100		0.5	0.0017	61
0.4Ba0.45Sr0.55TiO3 - 0.6[0.2Mg2TiO4 - 0.8MgO]	ceramic	0.45	1400	10k		4.5			100		0.8	0.0017	61
0.4Ba0.45Sr0.55TiO3 - 0.6[0.2Mg2TiO4 - 0.8MgO]	ceramic	0.45	1400	10k		5.6			100		1.2	0.0017	61
0.4Ba0.45Sr0.55TiO3 - 0.6[0.2Mg2TiO4 - 0.8MgO]	ceramic	0.45	1400	10k		6.7			100		1.7	0.0017	61
0.4Ba0.45Sr0.55TiO3 - 0.6[0.2Mg2TiO4 - 0.8MgO]	ceramic	0.45	1400	10k		7.8			100		2.2	0.0017	61
0.4Ba0.45Sr0.55TiO3 - 0.6[0.2Mg2TiO4 - 0.8MgO]	ceramic	0.45	1400	10k		8.9			100		2.7	0.0017	61
0.4Ba0.45Sr0.55TiO3 - 0.6[0.2Mg2TiO4 - 0.8MgO]	ceramic	0.45	1400	10k		10.1			100		3.1	0.0017	61
0.4Ba0.45Sr0.55TiO3 - 0.6[0.2Mg2TiO4 - 0.8MgO]	ceramic	0.45	1400	10k		11.1			100		3.7	0.0017	61
0.4Ba0.45Sr0.55TiO3 - 0.6[0.2Mg2TiO4 - 0.8MgO]	ceramic	0.45	1400	10k		12.3			100		4.1	0.0017	61
0.4Ba0.45Sr0.55TiO3 - 0.6[0.2Mg2TiO4 - 0.8MgO]	ceramic	0.45	1400	10k		13.3			100		4.5	0.0017	61
0.4Ba0.45Sr0.55TiO3 - 0.6[0.2Mg2TiO4 - 0.8MgO]	ceramic	0.45	1400	10k		14.5			100		4.9	0.0017	61
0.4Ba0.45Sr0.55TiO3 - 0.6[0.2Mg2TiO4 - 0.8MgO]	ceramic	0.45	1400	10k		15.6			100		5.3	0.0017	61
0.4Ba0.45Sr0.55TiO3 - 0.6[0.2Mg2TiO4 - 0.8MgO]	ceramic	0.45	1400	10k		16.7			100		5.7	0.0017	61
0.4Ba0.45Sr0.55TiO3 - 0.6[0.2Mg2TiO4 - 0.8MgO]	ceramic	0.45	1400	10k		17.8			100		6.1	0.0017	61
0.4Ba0.45Sr0.55TiO3 - 0.6[0.2Mg2TiO4 - 0.8MgO]	ceramic	0.45	1400	10k		18.9			100		6.4	0.0017	61
0.4Ba0.45Sr0.55TiO3 - 0.6[0.2Mg2TiO4 - 0.8MgO]	ceramic	0.45	1400	10k		20			100		6.9	0.0017	61
0.35Ba0.45Sr0.55TiO3 - 0.65[0.2Mg2TiO4 - 0.8MgO]	ceramic	0.45	1400	10k		1.1			75.6		0.2	0.0014	61
0.35Ba0.45Sr0.55TiO3 - 0.65[0.2Mg2TiO4 - 0.8MgO]	ceramic	0.45	1400	10k		2.1			75.6		0.2	0.0014	61
0.35Ba0.45Sr0.55TiO3 - 0.65[0.2Mg2TiO4 - 0.8MgO]	ceramic	0.45	1400	10k		3.3			75.6		0.4	0.0014	61
0.35Ba0.45Sr0.55TiO3 - 0.65[0.2Mg2TiO4 - 0.8MgO]	ceramic	0.45	1400	10k		6.5			75.6		1.3	0.0014	61
0.35Ba0.45Sr0.55TiO3 - 0.65[0.2Mg2TiO4 - 0.8MgO]	ceramic	0.45	1400	10k		7.6			75.6		1.6	0.0014	61
0.35Ba0.45Sr0.55TiO3 - 0.65[0.2Mg2TiO4 - 0.8MgO]	ceramic	0.45	1400	10k		8.7			75.6		2	0.0014	61
0.35Ba0.45Sr0.55TiO3 - 0.65[0.2Mg2TiO4 - 0.8MgO]	ceramic	0.45	1400	10k		9.7			75.6		2.4	0.0014	61
0.35Ba0.45Sr0.55TiO3 - 0.65[0.2Mg2TiO4 - 0.8MgO]	ceramic	0.45	1400	10k		10			75.6		2.6	0.0014	61
0.35Ba0.45Sr0.55TiO3 - 0.65[0.2Mg2TiO4 - 0.8MgO]	ceramic	0.45	1400	10k		10.8			75.6		2.9	0.0014	61
0.35Ba0.45Sr0.55TiO3 - 0.65[0.2Mg2TiO4 - 0.8MgO]	ceramic	0.45	1400	10k		11.9			75.6		3.3	0.0014	61
0.35Ba0.45Sr0.55TiO3 - 0.65[0.2Mg2TiO4 - 0.8MgO]	ceramic	0.45	1400	10k		13			75.6		3.7	0.0014	61
0.35Ba0.45Sr0.55TiO3 - 0.65[0.2Mg2TiO4 - 0.8MgO]	ceramic	0.45	1400	10k		14.1			75.6		4.1	0.0014	61
0.35Ba0.45Sr0.55TiO3 - 0.65[0.2Mg2TiO4 - 0.8MgO]	ceramic	0.45	1400	10k		15.2			75.6		4.6	0.0014	61
0.35Ba0.45Sr0.55TiO3 - 0.65[0.2Mg2TiO4 - 0.8MgO]	ceramic	0.45	1400	10k		16.2			75.6		4.9	0.0014	61
0.35Ba0.45Sr0.55TiO3 - 0.65[0.2Mg2TiO4 - 0.8MgO]	ceramic	0.45	1400	10k		17.3			75.6		5.3	0.0014	61
0.35Ba0.45Sr0.55TiO3 - 0.65[0.2Mg2TiO4 - 0.8MgO]	ceramic	0.45	1400	10k		18.4			75.6		5.7	0.0014	61
0.35Ba0.45Sr0.55TiO3 - 0.65[0.2Mg2TiO4 - 0.8MgO]	ceramic	0.45	1400	10k		19.4			75.6		6.1	0.0014	61
0.35Ba0.45Sr0.55TiO3 - 0.65[0.2Mg2TiO4 - 0.8MgO]	ceramic	0.45	1400	10k		20			75.6		6.4	0.0014	61
0.35Ba0.45Sr0.55TiO3 - 0.65[0.2Mg2TiO4 - 0.8MgO]	ceramic	0.45	1400	10k		20.6			75.6		6.6	0.0014	61
0.35Ba0.45Sr0.55TiO3 - 0.65[0.2Mg2TiO4 - 0.8MgO]	ceramic	0.45	1400	10k		21.6			75.6		7	0.0014	61
0.35Ba0.45Sr0.55TiO3 - 0.65[0.2Mg2TiO4 - 0.8MgO]	ceramic	0.45	1400	10k		4.3			75.6		0.6	0.0014	61
0.35Ba0.45Sr0.55TiO3 - 0.65[0.2Mg2TiO4 - 0.8MgO]	ceramic	0.45	1400	10k		5.5			75.6		1	0.0014	61
0.35Ba0.45Sr0.55TiO3 - 0.65[0.2Mg2TiO4 - 0.8MgO]	ceramic	0.45	1400	10k		22.7			75.6		7.8	0.0014	61
0.35Ba0.45Sr0.55TiO3 - 0.65[0.2Mg2TiO4 - 0.8MgO]	ceramic	0.45	1400	10k		23.8			75.6		7.9	0.0014	61
0.35Ba0.45Sr0.55TiO3 - 0.65[0.2Mg2TiO4 - 0.8MgO]	ceramic	0.45	1400	10k		24.8			75.6		8.2	0.0014	61
0.925Ba0.45Sr0.55TiO3 - 0.075[0.8Mg2TiO4 - 0.2MgO]	ceramic	0.45	1400	10k		7.7			807.4		0.6	0.0006	61
0.925Ba0.45Sr0.55TiO3 - 0.075[0.8Mg2TiO4 - 0.2MgO]	ceramic	0.45	1400	10k		8.8			807.4		0.8	0.0006	61
0.925Ba0.45Sr0.55TiO3 - 0.075[0.8Mg2TiO4 - 0.2MgO]	ceramic	0.45	1400	10k		9.7			807.4		1.2	0.0006	61
0.925Ba0.45Sr0.55TiO3 - 0.075[0.8Mg2TiO4 - 0.2MgO]	ceramic	0.45	1400	10k		10			807.4		1.4	0.0006	61
0.925Ba0.45Sr0.55TiO3 - 0.075[0.8Mg2TiO4 - 0.2MgO]	ceramic	0.45	1400	10k		10.7			807.4		1.4	0.0006	61
0.925Ba0.45Sr0.55TiO3 - 0.075[0.8Mg2TiO4 - 0.2MgO]	ceramic	0.45	1400	10k		11.7			807.4		1.6	0.0006	61
0.925Ba0.45Sr0.55TiO3 - 0.075[0.8Mg2TiO4 - 0.2MgO]	ceramic	0.45	1400	10k		12.5			807.4		2	0.0006	61
0.925Ba0.45Sr0.55TiO3 - 0.075[0.8Mg2TiO4 - 0.2MgO]	ceramic	0.45	1400	10k		13.6			807.4		2.3	0.0006	61
0.925Ba0.45Sr0.55TiO3 - 0.075[0.8Mg2TiO4 - 0.2MgO]	ceramic	0.45	1400	10k		14.6			807.4		2.6	0.0006	61
0.925Ba0.45Sr0.55TiO3 - 0.075[0.8Mg2TiO4 - 0.2MgO]	ceramic	0.45	1400	10k		15.5			807.4		3.3	0.0006	61
0.925Ba0.45Sr0.55TiO3 - 0.075[0.8Mg2TiO4 - 0.2MgO]	ceramic	0.45	1400	10k		16.5			807.4		3.8	0.0006	61
0.925Ba0.45Sr0.55TiO3 - 0.075[0.8Mg2TiO4 - 0.2MgO]	ceramic	0.45	1400	10k		17.5			807.4		4	0.0006	61
0.925Ba0.45Sr0.55TiO3 - 0.075[0.8Mg2TiO4 - 0.2MgO]	ceramic	0.45	1400	10k		18.5			807.4		4.4	0.0006	61
0.925Ba0.45Sr0.55TiO3 - 0.075[0.8Mg2TiO4 - 0.2MgO]	ceramic	0.45	1400	10k		19.5			807.4		5.2	0.0006	61
0.925Ba0.45Sr0.55TiO3 - 0.075[0.8Mg2TiO4 - 0.2MgO]	ceramic	0.45	1400	10k		20			807.4		5.1	0.0006	61
0.925Ba0.45Sr0.55TiO3 - 0.075[0.8Mg2TiO4 - 0.2MgO]	ceramic	0.45	1400	10k		20.5			807.4		5.2	0.0006	61
0.925Ba0.45Sr0.55TiO3 - 0.075[0.8Mg2TiO4 - 0.2MgO]	ceramic	0.45	1400	10k		21.5			807.4		5.6	0.0006	61
0.925Ba0.45Sr0.55TiO3 - 0.075[0.8Mg2TiO4 - 0.2MgO]	ceramic	0.45	1400	10k		22.4			807.4		5.9	0.0006	61
0.925Ba0.45Sr0.55TiO3 - 0.075[0.8Mg2TiO4 - 0.2MgO]	ceramic	0.45	1400	10k		23.4			807.4		6.4	0.0006	61
0.85Ba0.45Sr0.55TiO3 - 0.15[0.8Mg2TiO4 - 0.2MgO]	ceramic	0.45	1400	10k		5.8			697.8		0.7	0.00061	61
0.85Ba0.45Sr0.55TiO3 - 0.15[0.8Mg2TiO4 - 0.2MgO]	ceramic	0.45	1400	10k		6.8			697.8		0.7	0.00061	61
0.85Ba0.45Sr0.55TiO3 - 0.15[0.8Mg2TiO4 - 0.2MgO]	ceramic	0.45	1400	10k		7.7			697.8		1.3	0.00061	61
0.85Ba0.45Sr0.55TiO3 - 0.15[0.8Mg2TiO4 - 0.2MgO]	ceramic	0.45	1400	10k		8.7			697.8		1.9	0.00061	61
0.85Ba0.45Sr0.55TiO3 - 0.15[0.8Mg2TiO4 - 0.2MgO]	ceramic	0.45	1400	10k		9.8			697.8		2	0.00061	61
0.85Ba0.45Sr0.55TiO3 - 0.15[0.8Mg2TiO4 - 0.2MgO]	ceramic	0.45	1400	10k		9.9			697.8		2.2	0.00061	61
0.85Ba0.45Sr0.55TiO3 - 0.15[0.8Mg2TiO4 - 0.2MgO]	ceramic	0.45	1400	10k		10.7			697.8		2.5	0.00061	61
0.85Ba0.45Sr0.55TiO3 - 0.15[0.8Mg2TiO4 - 0.2MgO]	ceramic	0.45	1400	10k		11.6			697.8		2.9	0.00061	61
0.85Ba0.45Sr0.55TiO3 - 0.15[0.8Mg2TiO4 - 0.2MgO]	ceramic	0.45	1400	10k		12.6			697.8		3.2	0.00061	61
0.85Ba0.45Sr0.55TiO3 - 0.15[0.8Mg2TiO4 - 0.2MgO]	ceramic	0.45	1400	10k		13.6			697.8		3.7	0.00061	61
0.85Ba0.45Sr0.55TiO3 - 0.15[0.8Mg2TiO4 - 0.2MgO]	ceramic	0.45	1400	10k		14.6			697.8		4	0.00061	61
0.85Ba0.45Sr0.55TiO3 - 0.15[0.8Mg2TiO4 - 0.2MgO]	ceramic	0.45	1400	10k		15.5			697.8		4.3	0.00061	61
0.85Ba0.45Sr0.55TiO3 - 0.15[0.8Mg2TiO4 - 0.2MgO]	ceramic	0.45	1400	10k		16.6			697.8		4.6	0.00061	61
0.85Ba0.45Sr0.55TiO3 - 0.15[0.8Mg2TiO4 - 0.2MgO]	ceramic	0.45	1400	10k		17.5			697.8		5.1	0.00061	61
0.85Ba0.45Sr0.55TiO3 - 0.15[0.8Mg2TiO4 - 0.2MgO]	ceramic	0.45	1400	10k		18.5			697.8		5.5	0.00061	61
0.85Ba0.45Sr0.55TiO3 - 0.15[0.8Mg2TiO4 - 0.2MgO]	ceramic	0.45	1400	10k		19.4			697.8		6	0.00061	61
0.85Ba0.45Sr0.55TiO3 - 0.15[0.8Mg2TiO4 - 0.2MgO]	ceramic	0.45	1400	10k		20			697.8		6	0.00061	61
0.85Ba0.45Sr0.55TiO3 - 0.15[0.8Mg2TiO4 - 0.2MgO]	ceramic	0.45	1400	10k		20.4			697.8		6.4	0.00061	61
0.85Ba0.45Sr0.55TiO3 - 0.15[0.8Mg2TiO4 - 0.2MgO]	ceramic	0.45	1400	10k		21.4			697.8		6.9	0.00061	61
0.85Ba0.45Sr0.55TiO3 - 0.15[0.8Mg2TiO4 - 0.2MgO]	ceramic	0.45	1400	10k		22.4			697.8		7.5	0.00061	61
0.85Ba0.45Sr0.55TiO3 - 0.15[0.8Mg2TiO4 - 0.2MgO]	ceramic	0.45	1400	10k		23.4			697.8		7.8	0.00061	61
0.85Ba0.45Sr0.55TiO3 - 0.15[0.8Mg2TiO4 - 0.2MgO]	ceramic	0.45	1400	10k		24.3			697.8		8.3	0.00061	61
0.925Ba0.45Sr0.55TiO3 - 0.075[0.5Mg2TiO4 - 0.5MgO]	ceramic	0.45	1400	10k		4.1			794.4		0.6	0.00086	61
0.925Ba0.45Sr0.55TiO3 - 0.075[0.5Mg2TiO4 - 0.5MgO]	ceramic	0.45	1400	10k		5.2			794.4		0.7	0.00086	61
0.925Ba0.45Sr0.55TiO3 - 0.075[0.5Mg2TiO4 - 0.5MgO]	ceramic	0.45	1400	10k		6.3			794.4		0.7	0.00086	61
0.925Ba0.45Sr0.55TiO3 - 0.075[0.5Mg2TiO4 - 0.5MgO]	ceramic	0.45	1400	10k		7.3			794.4		1.1	0.00086	61
0.925Ba0.45Sr0.55TiO3 - 0.075[0.5Mg2TiO4 - 0.5MgO]	ceramic	0.45	1400	10k		8.4			794.4		1.1	0.00086	61
0.925Ba0.45Sr0.55TiO3 - 0.075[0.5Mg2TiO4 - 0.5MgO]	ceramic	0.45	1400	10k		9.4			794.4		1.5	0.00086	61
0.925Ba0.45Sr0.55TiO3 - 0.075[0.5Mg2TiO4 - 0.5MgO]	ceramic	0.45	1400	10k		9.9			794.4		1.5	0.00086	61
0.925Ba0.45Sr0.55TiO3 - 0.075[0.5Mg2TiO4 - 0.5MgO]	ceramic	0.45	1400	10k		10.5			794.4		1.9	0.00086	61
0.925Ba0.45Sr0.55TiO3 - 0.075[0.5Mg2TiO4 - 0.5MgO]	ceramic	0.45	1400	10k		11.6			794.4		2.2	0.00086	61
0.925Ba0.45Sr0.55TiO3 - 0.075[0.5Mg2TiO4 - 0.5MgO]	ceramic	0.45	1400	10k		12.6			794.4		2.5	0.00086	61
0.925Ba0.45Sr0.55TiO3 - 0.075[0.5Mg2TiO4 - 0.5MgO]	ceramic	0.45	1400	10k		13.6			794.4		2.9	0.00086	61
0.925Ba0.45Sr0.55TiO3 - 0.075[0.5Mg2TiO4 - 0.5MgO]	ceramic	0.45	1400	10k		14.7			794.4		3.2	0.00086	61
0.925Ba0.45Sr0.55TiO3 - 0.075[0.5Mg2TiO4 - 0.5MgO]	ceramic	0.45	1400	10k		15.7			794.4		3.4	0.00086	61
0.925Ba0.45Sr0.55TiO3 - 0.075[0.5Mg2TiO4 - 0.5MgO]	ceramic	0.45	1400	10k		16.8			794.4		3.8	0.00086	61
0.925Ba0.45Sr0.55TiO3 - 0.075[0.5Mg2TiO4 - 0.5MgO]	ceramic	0.45	1400	10k		17.8			794.4		4.3	0.00086	61
0.925Ba0.45Sr0.55TiO3 - 0.075[0.5Mg2TiO4 - 0.5MgO]	ceramic	0.45	1400	10k		18.9			794.4		4.7	0.00086	61
0.925Ba0.45Sr0.55TiO3 - 0.075[0.5Mg2TiO4 - 0.5MgO]	ceramic	0.45	1400	10k		19.9			794.4		5	0.00086	61
0.925Ba0.45Sr0.55TiO3 - 0.075[0.5Mg2TiO4 - 0.5MgO]	ceramic	0.45	1400	10k		21			794.4		5.6	0.00086	61
0.925Ba0.45Sr0.55TiO3 - 0.075[0.5Mg2TiO4 - 0.5MgO]	ceramic	0.45	1400	10k		22			794.4		5.9	0.00086	61
0.925Ba0.45Sr0.55TiO3 - 0.075[0.5Mg2TiO4 - 0.5MgO]	ceramic	0.45	1400	10k		23			794.4		6.4	0.00086	61
0.85Ba0.45Sr0.55TiO3 - 0.15[0.5Mg2TiO4 - 0.5MgO]	ceramic	0.45	1400	10k		4.9			673.7		0.6	0.0007	61
0.85Ba0.45Sr0.55TiO3 - 0.15[0.5Mg2TiO4 - 0.5MgO]	ceramic	0.45	1400	10k		5.9			673.7		0.9	0.0007	61
0.85Ba0.45Sr0.55TiO3 - 0.15[0.5Mg2TiO4 - 0.5MgO]	ceramic	0.45	1400	10k		6.9			673.7		1.1	0.0007	61
0.85Ba0.45Sr0.55TiO3 - 0.15[0.5Mg2TiO4 - 0.5MgO]	ceramic	0.45	1400	10k		7.9			673.7		1.4	0.0007	61
0.85Ba0.45Sr0.55TiO3 - 0.15[0.5Mg2TiO4 - 0.5MgO]	ceramic	0.45	1400	10k		8.8			673.7		1.5	0.0007	61
0.85Ba0.45Sr0.55TiO3 - 0.15[0.5Mg2TiO4 - 0.5MgO]	ceramic	0.45	1400	10k		9.6			673.7		1.9	0.0007	61
0.85Ba0.45Sr0.55TiO3 - 0.15[0.5Mg2TiO4 - 0.5MgO]	ceramic	0.45	1400	10k		10			673.7		2.1	0.0007	61
0.85Ba0.45Sr0.55TiO3 - 0.15[0.5Mg2TiO4 - 0.5MgO]	ceramic	0.45	1400	10k		10.7			673.7		2.3	0.0007	61
0.85Ba0.45Sr0.55TiO3 - 0.15[0.5Mg2TiO4 - 0.5MgO]	ceramic	0.45	1400	10k		11.7			673.7		2.6	0.0007	61
0.85Ba0.45Sr0.55TiO3 - 0.15[0.5Mg2TiO4 - 0.5MgO]	ceramic	0.45	1400	10k		12.6			673.7		3	0.0007	61
0.85Ba0.45Sr0.55TiO3 - 0.15[0.5Mg2TiO4 - 0.5MgO]	ceramic	0.45	1400	10k		13.6			673.7		3.3	0.0007	61
0.85Ba0.45Sr0.55TiO3 - 0.15[0.5Mg2TiO4 - 0.5MgO]	ceramic	0.45	1400	10k		14.6			673.7		3.8	0.0007	61
0.85Ba0.45Sr0.55TiO3 - 0.15[0.5Mg2TiO4 - 0.5MgO]	ceramic	0.45	1400	10k		15.6			673.7		4.2	0.0007	61
0.85Ba0.45Sr0.55TiO3 - 0.15[0.5Mg2TiO4 - 0.5MgO]	ceramic	0.45	1400	10k		16.6			673.7		4.5	0.0007	61
0.85Ba0.45Sr0.55TiO3 - 0.15[0.5Mg2TiO4 - 0.5MgO]	ceramic	0.45	1400	10k		17.5			673.7		5	0.0007	61
0.85Ba0.45Sr0.55TiO3 - 0.15[0.5Mg2TiO4 - 0.5MgO]	ceramic	0.45	1400	10k		18.4			673.7		5.4	0.0007	61
0.85Ba0.45Sr0.55TiO3 - 0.15[0.5Mg2TiO4 - 0.5MgO]	ceramic	0.45	1400	10k		19.4			673.7		5.9	0.0007	61
0.85Ba0.45Sr0.55TiO3 - 0.15[0.5Mg2TiO4 - 0.5MgO]	ceramic	0.45	1400	10k		20			673.7		6.2	0.0007	61
0.85Ba0.45Sr0.55TiO3 - 0.15[0.5Mg2TiO4 - 0.5MgO]	ceramic	0.45	1400	10k		20.5			673.7		6.3	0.0007	61
0.85Ba0.45Sr0.55TiO3 - 0.15[0.5Mg2TiO4 - 0.5MgO]	ceramic	0.45	1400	10k		21.4			673.7		6.8	0.0007	61
0.925Ba0.45Sr0.55TiO3 - 0.075[0.2Mg2TiO4 - 0.8MgO]	ceramic	0.45	1400	10k		3.3			721.6		0.1	0.00095	61
0.925Ba0.45Sr0.55TiO3 - 0.075[0.2Mg2TiO4 - 0.8MgO]	ceramic	0.45	1400	10k		4.4			721.6		0.2	0.00095	61
0.925Ba0.45Sr0.55TiO3 - 0.075[0.2Mg2TiO4 - 0.8MgO]	ceramic	0.45	1400	10k		5.6			721.6		0.5	0.00095	61
0.925Ba0.45Sr0.55TiO3 - 0.075[0.2Mg2TiO4 - 0.8MgO]	ceramic	0.45	1400	10k		6.7			721.6		0.5	0.00095	61
0.925Ba0.45Sr0.55TiO3 - 0.075[0.2Mg2TiO4 - 0.8MgO]	ceramic	0.45	1400	10k		7.8			721.6		0.8	0.00095	61
0.925Ba0.45Sr0.55TiO3 - 0.075[0.2Mg2TiO4 - 0.8MgO]	ceramic	0.45	1400	10k		8.8			721.6		1	0.00095	61
0.925Ba0.45Sr0.55TiO3 - 0.075[0.2Mg2TiO4 - 0.8MgO]	ceramic	0.45	1400	10k		9.9			721.6		1.2	0.00095	61
0.925Ba0.45Sr0.55TiO3 - 0.075[0.2Mg2TiO4 - 0.8MgO]	ceramic	0.45	1400	10k		11.1			721.6		1.5	0.00095	61
0.925Ba0.45Sr0.55TiO3 - 0.075[0.2Mg2TiO4 - 0.8MgO]	ceramic	0.45	1400	10k		12.2			721.6		1.9	0.00095	61
0.925Ba0.45Sr0.55TiO3 - 0.075[0.2Mg2TiO4 - 0.8MgO]	ceramic	0.45	1400	10k		13.3			721.6		2	0.00095	61
0.925Ba0.45Sr0.55TiO3 - 0.075[0.2Mg2TiO4 - 0.8MgO]	ceramic	0.45	1400	10k		14.4			721.6		2.6	0.00095	61
0.925Ba0.45Sr0.55TiO3 - 0.075[0.2Mg2TiO4 - 0.8MgO]	ceramic	0.45	1400	10k		15.5			721.6		2.9	0.00095	61
0.925Ba0.45Sr0.55TiO3 - 0.075[0.2Mg2TiO4 - 0.8MgO]	ceramic	0.45	1400	10k		16.6			721.6		3.3	0.00095	61
0.925Ba0.45Sr0.55TiO3 - 0.075[0.2Mg2TiO4 - 0.8MgO]	ceramic	0.45	1400	10k		17.7			721.6		3.7	0.00095	61
0.925Ba0.45Sr0.55TiO3 - 0.075[0.2Mg2TiO4 - 0.8MgO]	ceramic	0.45	1400	10k		18.9			721.6		4.2	0.00095	61
0.925Ba0.45Sr0.55TiO3 - 0.075[0.2Mg2TiO4 - 0.8MgO]	ceramic	0.45	1400	10k		20			721.6		4.4	0.00095	61
0.85Ba0.45Sr0.55TiO3 - 0.15[0.2Mg2TiO4 - 0.8MgO]	ceramic	0.45	1400	10k		3.9			576.8		0.4	0.0009	61
0.85Ba0.45Sr0.55TiO3 - 0.15[0.2Mg2TiO4 - 0.8MgO]	ceramic	0.45	1400	10k		4.9			576.8		0.6	0.0009	61
0.85Ba0.45Sr0.55TiO3 - 0.15[0.2Mg2TiO4 - 0.8MgO]	ceramic	0.45	1400	10k		5.8			576.8		0.8	0.0009	61
0.85Ba0.45Sr0.55TiO3 - 0.15[0.2Mg2TiO4 - 0.8MgO]	ceramic	0.45	1400	10k		6.8			576.8		1.1	0.0009	61
0.85Ba0.45Sr0.55TiO3 - 0.15[0.2Mg2TiO4 - 0.8MgO]	ceramic	0.45	1400	10k		7.8			576.8		1.4	0.0009	61
0.85Ba0.45Sr0.55TiO3 - 0.15[0.2Mg2TiO4 - 0.8MgO]	ceramic	0.45	1400	10k		8.8			576.8		1.6	0.0009	61
0.85Ba0.45Sr0.55TiO3 - 0.15[0.2Mg2TiO4 - 0.8MgO]	ceramic	0.45	1400	10k		9.7			576.8		1.9	0.0009	61
0.85Ba0.45Sr0.55TiO3 - 0.15[0.2Mg2TiO4 - 0.8MgO]	ceramic	0.45	1400	10k		10			576.8		1.9	0.0009	61
0.85Ba0.45Sr0.55TiO3 - 0.15[0.2Mg2TiO4 - 0.8MgO]	ceramic	0.45	1400	10k		10.7			576.8		2.3	0.0009	61
0.85Ba0.45Sr0.55TiO3 - 0.15[0.2Mg2TiO4 - 0.8MgO]	ceramic	0.45	1400	10k		11.7			576.8		2.6	0.0009	61
0.85Ba0.45Sr0.55TiO3 - 0.15[0.2Mg2TiO4 - 0.8MgO]	ceramic	0.45	1400	10k		12.7			576.8		3.1	0.0009	61
0.85Ba0.45Sr0.55TiO3 - 0.15[0.2Mg2TiO4 - 0.8MgO]	ceramic	0.45	1400	10k		13.6			576.8		3.4	0.0009	61
0.85Ba0.45Sr0.55TiO3 - 0.15[0.2Mg2TiO4 - 0.8MgO]	ceramic	0.45	1400	10k		14.6			576.8		3.7	0.0009	61
0.85Ba0.45Sr0.55TiO3 - 0.15[0.2Mg2TiO4 - 0.8MgO]	ceramic	0.45	1400	10k		15.6			576.8		4	0.0009	61
0.85Ba0.45Sr0.55TiO3 - 0.15[0.2Mg2TiO4 - 0.8MgO]	ceramic	0.45	1400	10k		16.5			576.8		4.3	0.0009	61
0.85Ba0.45Sr0.55TiO3 - 0.15[0.2Mg2TiO4 - 0.8MgO]	ceramic	0.45	1400	10k		17.6			576.8		4.8	0.0009	61
0.85Ba0.45Sr0.55TiO3 - 0.15[0.2Mg2TiO4 - 0.8MgO]	ceramic	0.45	1400	10k		18.5			576.8		5.3	0.0009	61
0.85Ba0.45Sr0.55TiO3 - 0.15[0.2Mg2TiO4 - 0.8MgO]	ceramic	0.45	1400	10k		19.5			576.8		5.8	0.0009	61
0.85Ba0.45Sr0.55TiO3 - 0.15[0.2Mg2TiO4 - 0.8MgO]	ceramic	0.45	1400	10k		20			576.8		6.2	0.0009	61
40wt%Ba0.6Sr0.4TiO3 - 60wt%MgO	ceramic	0.6		100k		3.9	-52				3	0.0036	62
40wt%Ba0.6Sr0.4TiO3 - 60wt%MgO	ceramic	0.6		100k		8	-52				8.6	0.0034	62
40wt%Ba0.6Sr0.4TiO3 - 60wt%MgO	ceramic	0.6		100k		11.9	-52				15.3	0.0033	62
40wt%Ba0.6Sr0.4TiO3 - 60wt%MgO	ceramic	0.6		100k		16	-52				21.4	0.0031	62
40wt%Ba0.6Sr0.4TiO3 - 60wt%MgO	ceramic	0.6		100k		20.1	-52				27	0.0029	62
40wt%Ba0.6Sr0.4TiO3 - 60wt%MgO	ceramic	0.6		100k		24	-52				31.6	0.0027	62
40wt%Ba0.6Sr0.4TiO3 - 60wt%MgO	ceramic	0.6		100k		27.9	-52				34.4	0.0024	62
40wt%Ba0.6Sr0.4TiO3 - 60wt%MgO	ceramic	0.6		100k		32.2	-52				37.9	0.0022	62
40wt%Ba0.6Sr0.4TiO3 - 60wt%MgO	ceramic	0.6		100k		36.1	-52				40.9	0.002	62
40wt%Ba0.6Sr0.4TiO3 - 60wt%MgO	ceramic	0.6		100k		40	-52				43.3	0.0019	62
Ba0.67Sr0.33TiO3	ceramic	0.67	1275	10k		15	29.8				43.1	0.014	21
Ba0.6Sr0.4TiO3	ceramic	0.6	1200	10k		20					29.8	0.0168	3
Ba0.6Sr0.4TiO3	ceramic	0.6	1230	10k		20					29	0.0023	3
Ba0.6Sr0.4TiO3	ceramic	0.6	1250	10k		20					31.3	0.002	3
Ba0.6Sr0.4TiO3	ceramic	0.6	1280	10k		20					29.3	0.006	3
Ba0.6Sr0.4TiO3	ceramic	0.6		10k		1	1			1-2um	2.2	0.00234	23
Ba0.6Sr0.4TiO3	ceramic	0.6		10k		2	1			1-2um	4.2	0.00234	23
Ba0.6Sr0.4TiO3	ceramic	0.6		10k		3	1			1-2um	6.6	0.00234	23
Ba0.6Sr0.4TiO3	ceramic	0.6		10k		4	1			1-2um	9.4	0.00234	23
Ba0.6Sr0.4TiO3	ceramic	0.6		10k		5	1			1-2um	11.9	0.00234	23
Ba0.6Sr0.4TiO3	ceramic	0.6		10k		6	1			1-2um	14.4	0.00234	23
Ba0.6Sr0.4TiO3	ceramic	0.6		10k		7	1			1-2um	16.8	0.00234	23
Ba0.6Sr0.4TiO3	ceramic	0.6		10k		8	1			1-2um	19.4	0.00234	23
Ba0.6Sr0.4TiO3	ceramic	0.6		10k		9	1			1-2um	21.8	0.00234	23
Ba0.6Sr0.4TiO3	ceramic	0.6		10k		10	1			1-2um	24.3	0.00234	23
Ba0.6Sr0.4TiO3	ceramic	0.6		10k		11	1			1-2um	26.4	0.00234	23
Ba0.6Sr0.4TiO3	ceramic	0.6		10k		12	1			1-2um	28.6	0.00234	23
Ba0.6Sr0.4TiO3	ceramic	0.6		10k		13	1			1-2um	30.6	0.00234	23
Ba0.6Sr0.4TiO3	ceramic	0.6		10k		14	1			1-2um	32.9	0.00234	23
Ba0.6Sr0.4TiO3	ceramic	0.6		10k		15	1			1-2um	34.9	0.00234	23
Ba0.6Sr0.4TiO3	ceramic	0.6		10k		16	1			1-2um	37	0.00234	23
Ba0.6Sr0.4TiO3	ceramic	0.6		10k		17	1			1-2um	39	0.00234	23
Ba0.6Sr0.4TiO3	ceramic	0.6		10k		18	1			1-2um	40.9	0.00234	23
Ba0.6Sr0.4TiO3	ceramic	0.6		10k		19	1			1-2um	42.7	0.00234	23
Ba0.6Sr0.4TiO3	ceramic	0.6		10k		20	1			1-2um	44.3	0.00234	23
Ba0.5Sr0.5TiO3	ceramic	0.5		10k	15 C	1			2777		0.5	0.00174	4
Ba0.5Sr0.5TiO3	ceramic	0.5		10k	15 C	2			2777		1.3	0.00175	4
Ba0.5Sr0.5TiO3	ceramic	0.5		10k	15 C	3			2777		2	0.00172	4
Ba0.5Sr0.5TiO3	ceramic	0.5		10k	15 C	4			2777		2.8	0.0017	4
Ba0.5Sr0.5TiO3	ceramic	0.5		10k	15 C	5			2777		3.6	0.00168	4
Ba0.5Sr0.5TiO3	ceramic	0.5		10k	15 C	6			2777		4.7	0.00163	4
Ba0.5Sr0.5TiO3	ceramic	0.5		10k	15 C	7			2777		5.7	0.00165	4
Ba0.5Sr0.5TiO3	ceramic	0.5		10k	15 C	8			2777		6.8	0.00165	4
Ba0.5Sr0.5TiO3	ceramic	0.5		10k	15 C	9			2777		8	0.00162	4
Ba0.5Sr0.5TiO3	ceramic	0.5		10k	15 C	10			2777		9.3	0.00162	4
Ba0.5Sr0.5TiO3	ceramic	0.5		10k	15 C	11			2777		10.5	0.00162	4
Ba0.5Sr0.5TiO3	ceramic	0.5		10k	15 C	12			2777		11.6	0.00162	4
Ba0.5Sr0.5TiO3	ceramic	0.5		10k	15 C	13			2777		12.5	0.00158	4
Ba0.5Sr0.5TiO3	ceramic	0.5		10k	15 C	14			2777		13.6	0.00157	4
Ba0.5Sr0.5TiO3	ceramic	0.5		10k	15 C	15			2777		14.8	0.00155	4
Ba0.5Sr0.5TiO3	ceramic	0.5		10k	15 C	16			2777		15.9	0.00151	4
Ba0.5Sr0.5TiO3	ceramic	0.5		10k	15 C	17			2777		17.1	0.00155	4
Ba0.5Sr0.5TiO3	ceramic	0.5		10k	15 C	18			2777		18.5	0.00155	4
Ba0.5Sr0.5TiO3	ceramic	0.5		10k	15 C	19			2777		19	0.00152	4
Ba0.4Sr0.6TiO3	ceramic	0.4		10k	RT	1			1103		0.1	0.0008	2
Ba0.4Sr0.6TiO3	ceramic	0.4		10k	RT	2			1103		0.2	0.0008	2
Ba0.4Sr0.6TiO3	ceramic	0.4		10k	RT	3			1103		0.6	0.0008	2
Ba0.4Sr0.6TiO3	ceramic	0.4		10k	RT	4			1103		0.8	0.0008	2
Ba0.4Sr0.6TiO3	ceramic	0.4		10k	RT	5			1103		1.1	0.0008	2
Ba0.4Sr0.6TiO3	ceramic	0.4		10k	RT	6			1103		1.5	0.0008	2
Ba0.4Sr0.6TiO3	ceramic	0.4		10k	RT	7			1103		1.8	0.0008	2
Ba0.4Sr0.6TiO3	ceramic	0.4		10k	RT	8			1103		2.2	0.0008	2
Ba0.4Sr0.6TiO3	ceramic	0.4		10k	RT	9			1103		2.9	0.0008	2
Ba0.4Sr0.6TiO3	ceramic	0.4		10k	RT	10			1103		3.6	0.0008	2
Ba0.4Sr0.6TiO3	ceramic	0.4		10k	RT	11			1103		4.1	0.0008	2
Ba0.4Sr0.6TiO3	ceramic	0.4		10k	RT	12			1103		4.9	0.0008	2
Ba0.4Sr0.6TiO3	ceramic	0.4		10k	RT	13			1103		5.4	0.0008	2
Ba0.4Sr0.6TiO3	ceramic	0.4		10k	RT	14			1103		6.1	0.0008	2
Ba0.4Sr0.6TiO3	ceramic	0.4		10k	RT	15			1103		6.9	0.0008	2
Ba0.4Sr0.6TiO3	ceramic	0.4		10k	RT	16			1103		7.7	0.0008	2
Ba0.4Sr0.6TiO3	ceramic	0.4		10k	RT	17			1103		8.5	0.0008	2
Ba0.4Sr0.6TiO3	ceramic	0.4		10k	RT	18			1103		9.3	0.0008	2
Ba0.4Sr0.6TiO3	ceramic	0.4		10k	RT	19			1103		10.1	0.0008	2
Ba0.4Sr0.6TiO3	ceramic	0.4		10k	RT	20			1103		11	0.0008	2
Ba0.4Sr0.6TiO3	ceramic	0.4		10k	RT	21			1103		12	0.0008	2
Ba0.4Sr0.6TiO3	ceramic	0.4		10k	RT	22			1103		12.7	0.0008	2
Ba0.4Sr0.6TiO3	ceramic	0.4		10k	RT	23			1103		13.7	0.0008	2
Ba0.4Sr0.6TiO3	ceramic	0.4		10k	RT	24			1103		14.4	0.0008	2
Ba0.4Sr0.6TiO3	ceramic	0.4		10k	RT	25			1103		15.4	0.0008	2
Ba0.4Sr0.6TiO3	ceramic	0.4		10k	RT	26			1103		16.3	0.0008	2
Ba0.4Sr0.6TiO3	ceramic	0.4		10k	RT	27			1103		17.2	0.0008	2
Ba0.4Sr0.6TiO3	ceramic	0.4		10k	RT	28			1103		18.1	0.0008	2
Ba0.4Sr0.6TiO3	ceramic	0.4		10k	RT	29			1103		18.8	0.0008	2
Ba0.4Sr0.6TiO3	ceramic	0.4		10k	RT	30			1103		19.7	0.0008	2
Ba0.8Sr0.2TiO3	ceramic	0.8	1400	100M	RT	1			2227	3.7 um	0.5	0.08	60
Ba0.8Sr0.2TiO3	ceramic	0.8	1400	100M	RT	2			2227	3.7um	1.4	0.08	60
Ba0.8Sr0.2TiO3	ceramic	0.8	1400	100M	RT	3			2227	3.7 um	2.2	0.08	60
Ba0.8Sr0.2TiO3	ceramic	0.8	1400	100M	RT	4			2227	3.7um	2.9	0.08	60
Ba0.8Sr0.2TiO3	ceramic	0.8	1400	100M	RT	5			2227	3.7 um	3.8	0.08	60
Ba0.8Sr0.2TiO3	ceramic	0.8	1400	100M	RT	6			2227	3.7um	4.7	0.08	60
Ba0.8Sr0.2TiO3	ceramic	0.8	1400	100M	RT	7			2227	3.7 um	5.6	0.08	60
Ba0.8Sr0.2TiO3	ceramic	0.8	1400	100M	RT	8			2227	3.7um	6.4	0.08	60
Ba0.8Sr0.2TiO3	ceramic	0.8	1400	100M	RT	9			2227	3.7 um	7.4	0.08	60
Ba0.8Sr0.2TiO3	ceramic	0.8	1400	100M	RT	10			2227	3.7um	8.4	0.08	60
Ba0.8Sr0.2TiO3	ceramic	0.8	1400	100M	RT	11			2227	3.7 um	9.3	0.08	60
Ba0.8Sr0.2TiO3	ceramic	0.8	1400	100M	RT	12			2227	3.7um	10.4	0.08	60
Ba0.8Sr0.2TiO3	ceramic	0.8	1400	100M	RT	13			2227	3.7 um	11.1	0.08	60
Ba0.8Sr0.2TiO3	ceramic	0.8	1400	100M	RT	14			2227	3.7um	12	0.08	60
Ba0.8Sr0.2TiO3	ceramic	0.8	1400	100M	RT	15			2227	3.7 um	13.1	0.08	60
Ba0.3Sr0.7TiO3	ceramic	0.3		10k	RT	4			648.2		0.1	0.0005	63
Ba0.3Sr0.7TiO3	ceramic	0.3		10k	RT	5			648.2		0.2	0.0005	63
Ba0.3Sr0.7TiO3	ceramic	0.3		10k	RT	6			648.2		0.3	0.0005	63
Ba0.3Sr0.7TiO3	ceramic	0.3		10k	RT	7			648.2		0.4	0.0005	63
Ba0.3Sr0.7TiO3	ceramic	0.3		10k	RT	8			648.2		0.5	0.0005	63
Ba0.3Sr0.7TiO3	ceramic	0.3		10k	RT	9			648.2		0.7	0.0005	63
Ba0.3Sr0.7TiO3	ceramic	0.3		10k	RT	10			648.2		0.7	0.0005	63
Ba0.3Sr0.7TiO3	ceramic	0.3		10k	RT	11			648.2		0.9	0.0005	63
Ba0.3Sr0.7TiO3	ceramic	0.3		10k	RT	12			648.2		1.1	0.0005	63
Ba0.3Sr0.7TiO3	ceramic	0.3		10k	RT	13			648.2		1.2	0.0005	63
Ba0.3Sr0.7TiO3	ceramic	0.3		10k	RT	14			648.2		1.4	0.0005	63
Ba0.3Sr0.7TiO3	ceramic	0.3		10k	RT	15			648.2		1.6	0.0005	63
Ba0.3Sr0.7TiO3	ceramic	0.3		10k	RT	16			648.2		1.8	0.0005	63
Ba0.3Sr0.7TiO3	ceramic	0.3		10k	RT	17			648.2		2	0.0005	63
Ba0.3Sr0.7TiO3	ceramic	0.3		10k	RT	18			648.2		2.3	0.0005	63
Ba0.3Sr0.7TiO3	ceramic	0.3		10k	RT	19			648.2		2.5	0.0005	63
Ba0.3Sr0.7TiO3	ceramic	0.3		10k	RT	20			648.2		2.8	0.0005	63
Ba0.3Sr0.7TiO3	ceramic	0.3		10k	RT	21			648.2		3.1	0.0005	63
Ba0.3Sr0.7TiO3	ceramic	0.3		10k	RT	22			648.2		3.3	0.0005	63
Ba0.3Sr0.7TiO3	ceramic	0.3		10k	RT	23			648.2		3.6	0.0005	63
Ba0.3Sr0.7TiO3	ceramic	0.3		10k	RT	24			648.2		3.9	0.0005	63
Ba0.3Sr0.7TiO3	ceramic	0.3		10k	RT	25			648.2		4.2	0.0005	63
Ba0.3Sr0.7TiO3	ceramic	0.3		10k	RT	26			648.2		4.5	0.0005	63
Ba0.3Sr0.7TiO3	ceramic	0.3		10k	RT	27			648.2		4.8	0.0005	63
Ba0.3Sr0.7TiO3	ceramic	0.3		10k	RT	28			648.2		5.1	0.0005	63
Ba0.3Sr0.7TiO3	ceramic	0.3		10k	RT	29			648.2		5.3	0.0005	63
Ba0.3Sr0.7TiO3	ceramic	0.3		10k	RT	30			648.2		5.4	0.0005	63
Ba0.4Sr0.6TiO3	ceramic	0.4		10k	RT	1.9					0.1		63
Ba0.4Sr0.6TiO3	ceramic	0.4		10k	RT	3.8					0.5		63
Ba0.4Sr0.6TiO3	ceramic	0.4		10k	RT	5.6					1.1		63
Ba0.4Sr0.6TiO3	ceramic	0.4		10k	RT	7.5					1.9		63
Ba0.4Sr0.6TiO3	ceramic	0.4		10k	RT	9.4					2.7		63
Ba0.4Sr0.6TiO3	ceramic	0.4		10k	RT	11.3					4		63
Ba0.4Sr0.6TiO3	ceramic	0.4		10k	RT	13.2					5.3		63
Ba0.4Sr0.6TiO3	ceramic	0.4		10k	RT	15.1					6.8		63
Ba0.4Sr0.6TiO3	ceramic	0.4		10k	RT	16.9					8.1		63
Ba0.4Sr0.6TiO3	ceramic	0.4		10k	RT	18.8					9.5		63
Ba0.4Sr0.6TiO3	ceramic	0.4		10k	RT	20.1					10.8		63
Ba0.4Sr0.6TiO3	ceramic	0.4		10k	RT	21.9					12.3		63
Ba0.4Sr0.6TiO3	ceramic	0.4		10k	RT	24					14.2		63
Ba0.4Sr0.6TiO3	ceramic	0.4		10k	RT	25.9					15.9		63
Ba0.4Sr0.6TiO3	ceramic	0.4		10k	RT	28.1					18		63
Ba0.4Sr0.6TiO3	ceramic	0.4		10k	RT	30					18.8		63
Ba0.5Sr0.5TiO3	ceramic	0.5		10k	RT	1.3					0.1		63
Ba0.5Sr0.5TiO3	ceramic	0.5		10k	RT	2.6					0.3		63
Ba0.5Sr0.5TiO3	ceramic	0.5		10k	RT	3.8					0.7		63
Ba0.5Sr0.5TiO3	ceramic	0.5		10k	RT	5.1					1.1		63
Ba0.5Sr0.5TiO3	ceramic	0.5		10k	RT	6.4					1.5		63
Ba0.5Sr0.5TiO3	ceramic	0.5		10k	RT	7.6					2.3		63
Ba0.5Sr0.5TiO3	ceramic	0.5		10k	RT	9					3.1		63
Ba0.5Sr0.5TiO3	ceramic	0.5		10k	RT	10.2					4.1		63
Ba0.5Sr0.5TiO3	ceramic	0.5		10k	RT	11.5					5.2		63
Ba0.5Sr0.5TiO3	ceramic	0.5		10k	RT	12.9					6.1		63
Ba0.5Sr0.5TiO3	ceramic	0.5		10k	RT	14.1					7.2		63
Ba0.5Sr0.5TiO3	ceramic	0.5		10k	RT	15.4					8.3		63
Ba0.5Sr0.5TiO3	ceramic	0.5		10k	RT	16.6					9.5		63
Ba0.5Sr0.5TiO3	ceramic	0.5		10k	RT	17.9					10.7		63
Ba0.5Sr0.5TiO3	ceramic	0.5		10k	RT	19.1					11.9		63
Ba0.5Sr0.5TiO3	ceramic	0.5		10k	RT	20.5					13.1		63
Ba0.5Sr0.5TiO3	ceramic	0.5		10k	RT	21.7					14.4		63
Ba0.5Sr0.5TiO3	ceramic	0.5		10k	RT	23.1					15.7		63
Ba0.5Sr0.5TiO3	ceramic	0.5		10k	RT	24.3					16.9		63
Ba0.5Sr0.5TiO3	ceramic	0.5		10k	RT	25.6					18.2		63
Ba0.5Sr0.5TiO3	ceramic	0.5		10k	RT	26.8					19.6		63
Ba0.5Sr0.5TiO3	ceramic	0.5		10k	RT	28.1					20.8		63
Ba0.5Sr0.5TiO3	ceramic	0.5		10k	RT	30					23.5		63
Ba0.6Sr0.4TiO3	ceramic	0.6		10k	RT	1.1					0.2		63
Ba0.6Sr0.4TiO3	ceramic	0.6		10k	RT	2					1.2		63
Ba0.6Sr0.4TiO3	ceramic	0.6		10k	RT	3.1					2.3		63
Ba0.6Sr0.4TiO3	ceramic	0.6		10k	RT	4.1					3.7		63
Ba0.6Sr0.4TiO3	ceramic	0.6		10k	RT	5.5					5.8		63
Ba0.6Sr0.4TiO3	ceramic	0.6		10k	RT	6.7					8.1		63
Ba0.6Sr0.4TiO3	ceramic	0.6		10k	RT	7.7					10.5		63
Ba0.6Sr0.4TiO3	ceramic	0.6		10k	RT	8.8					12.8		63
Ba0.6Sr0.4TiO3	ceramic	0.6		10k	RT	9.8					15.4		63
Ba0.6Sr0.4TiO3	ceramic	0.6		10k	RT	11					17.9		63
Ba0.6Sr0.4TiO3	ceramic	0.6		10k	RT	12.8					21.4		63
Ba0.6Sr0.4TiO3	ceramic	0.6		10k	RT	13.8					23.7		63
Ba0.6Sr0.4TiO3	ceramic	0.6		10k	RT	14.8					25.8		63
Ba0.6Sr0.4TiO3	ceramic	0.6		10k	RT	15.9					27.9		63
Ba0.6Sr0.4TiO3	ceramic	0.6		10k	RT	17.1					29.6		63
Ba0.6Sr0.4TiO3	ceramic	0.6		10k	RT	18.1					31.9		63
Ba0.6Sr0.4TiO3	ceramic	0.6		10k	RT	19.2					33.8		63
Ba0.6Sr0.4TiO3	ceramic	0.6		10k	RT	20					34.9		63
Ba0.6Sr0.4TiO3	ceramic	0.6		10k	RT	21					36.5		63
Ba0.6Sr0.4TiO3	ceramic	0.6		10k	RT	22.3					38.2		63
Ba0.6Sr0.4TiO3	ceramic	0.6		10k	RT	23.3					39.8		63
Ba0.6Sr0.4TiO3	ceramic	0.6		10k	RT	24.3					41		63
Ba0.6Sr0.4TiO3	ceramic	0.6		10k	RT	25.4					42.1		63
Ba0.6Sr0.4TiO3	ceramic	0.6		10k	RT	26.5					43.5		63
Ba0.6Sr0.4TiO3	ceramic	0.6		10k	RT	27.4					44.7		63
Ba0.6Sr0.4TiO3	ceramic	0.6		10k	RT	28.5					45.6		63
Ba0.6Sr0.4TiO3	ceramic	0.6		10k	RT	29.5					46.8		63
Ba0.6Sr0.4TiO3	ceramic	0.6		10k	RT	30					50.1		63
Ba0.65Sr0.35TiO3	ceramic	0.65		10k	15	1	15	5238		0.3 um	0.5	0.0119262	31
Ba0.65Sr0.35TiO3	ceramic	0.65		10k	15	1.5	15	5238		0.3 um	1.3	0.0116803	31
Ba0.65Sr0.35TiO3	ceramic	0.65		10k	15	2	15	5238		0.3 um	3	0.0110656	31
Ba0.65Sr0.35TiO3	ceramic	0.65		10k	15	2.5	15	5238		0.3 um	5.4	0.0106967	31
Ba0.65Sr0.35TiO3	ceramic	0.65		10k	15	3	15	5238		0.3 um	7.5	0.010082	31
Ba0.65Sr0.35TiO3	ceramic	0.65		10k	15	3.5	15	5238		0.3 um	10	0.00971311	31
Ba0.65Sr0.35TiO3	ceramic	0.65		10k	15	4	15	5238		0.3 um	12.7	0.00946721	31
Ba0.65Sr0.35TiO3	ceramic	0.65		10k	15	4.5	15	5238		0.3 um	15.4	0.00897541	31
Ba0.65Sr0.35TiO3	ceramic	0.65		10k	15	5	15	5238		0.3 um	17.5	0.00872951	31
Ba0.65Sr0.35TiO3	ceramic	0.65		10k	15	5.5	15	5238		0.3 um	20	0.0082377	31
Ba0.65Sr0.35TiO3	ceramic	0.65		10k	15	6	15	5238		0.3 um	22.4	0.0082377	31
Ba0.65Sr0.35TiO3	ceramic	0.65		10k	15	6.5	15	5238		0.3 um	24.6	0.0079918	31
Ba0.65Sr0.35TiO3	ceramic	0.65		10k	15	7	15	5238		0.3 um	26.7	0.0077459	31
Ba0.65Sr0.35TiO3	ceramic	0.65		10k	15	7.5	15	5238		0.3 um	28.7	0.0075	31
Ba0.65Sr0.35TiO3	ceramic	0.65		10k	15	8	15	5238		0.3 um	30.6	0.00737705	31
Ba0.65Sr0.35TiO3	ceramic	0.65		10k	15	8.5	15	5238		0.3 um	32.4	0.0072541	31
Ba0.65Sr0.35TiO3	ceramic	0.65		10k	15	9	15	5238		0.3 um	34.1	0.00713115	31
Ba0.65Sr0.35TiO3	ceramic	0.65		10k	15	9.5	15	5238		0.3 um	35.7	0.0070082	31
Ba0.65Sr0.35TiO3	ceramic	0.65		10k	15	10	15	5238		0.3 um	37.3	0.00688525	31
Ba0.65Sr0.35TiO3	ceramic	0.65		10k	15	10.5	15	5238		0.3 um	38.6	0.0067623	31
Ba0.65Sr0.35TiO3	ceramic	0.65		10k	15	11	15	5238		0.3 um	40.1	0.00663934	31
Ba0.65Sr0.35TiO3	ceramic	0.65		10k	15	11.5	15	5238		0.3 um	41.4	0.00663934	31
Ba0.65Sr0.35TiO3	ceramic	0.65		10k	15	12	15	5238		0.3 um	42.8	0.00663934	31
Ba0.65Sr0.35TiO3	ceramic	0.65		10k	15	12.5	15	5238		0.3 um	43.9	0.00651639	31
Ba0.65Sr0.35TiO3	ceramic	0.65		10k	15	13	15	5238		0.3 um	45.3	0.00614754	31
Ba0.65Sr0.35TiO3	ceramic	0.65		10k	15	13.5	15	5238		0.3 um	46.3	0.00590164	31
Ba0.65Sr0.35TiO3	ceramic	0.65		10k	15	14	15	5238		0.3 um	47.8	0.00565574	31
Ba0.65Sr0.35TiO3	ceramic	0.65		10k	15	14.5	15	5238		0.3 um	48.5	0.00553279	31
Ba0.65Sr0.35TiO3	ceramic	0.65		10k	15	15	15	5238		0.3 um	49.5	0.00553279	31
Ba0.65Sr0.35TiO3	ceramic	0.65		10k	15	15.5	15	5238		0.3 um	50.5	0.00540984	31
Ba0.65Sr0.35TiO3	ceramic	0.65		10k	15	16	15	5238		0.3 um	51.5	0.00540984	31
Ba0.65Sr0.35TiO3	ceramic	0.65		10k	15	16.6	15	5238		0.3 um	52.5	0.00540984	31
Ba0.65Sr0.35TiO3	ceramic	0.65		10k	15	17	15	5238		0.3 um	53.3	0.00528689	31
Ba0.65Sr0.35TiO3	ceramic	0.65		10k	15	17.5	15	5238		0.3 um	54.2	0.00528689	31
Ba0.65Sr0.35TiO3	ceramic	0.65		10k	15	25	15	5238		0.3 um	68.58	0.00504098	31
Ba0.8Sr0.2TiO3	thin film	0.8		10k	RT	0						0.0044	64
40%wt Ba0.6Sr0.4TiO3 - 60%wt MgO	ceramic	0.6	1360C	100k		0	-52				0	0.00373907
40%wt Ba0.6Sr0.4TiO3 - 60%wt MgO	ceramic	0.6	1360C	100k		1	-52				1.00924	0.00369934
40%wt Ba0.6Sr0.4TiO3 - 60%wt MgO	ceramic	0.6	1360C	100k		2	-52				1.83425	0.0036465
40%wt Ba0.6Sr0.4TiO3 - 60%wt MgO	ceramic	0.6	1360C	100k		3	-52				2.65991	0.00361338
40%wt Ba0.6Sr0.4TiO3 - 60%wt MgO	ceramic	0.6	1360C	100k		4	-52				3.41684	0.00357369
40%wt Ba0.6Sr0.4TiO3 - 60%wt MgO	ceramic	0.6	1360C	100k		5	-52				4.99456	0.00352745
40%wt Ba0.6Sr0.4TiO3 - 60%wt MgO	ceramic	0.6	1360C	100k		6	-52				6.4358	0.00349431
40%wt Ba0.6Sr0.4TiO3 - 60%wt MgO	ceramic	0.6	1360C	100k		7	-52				7.7396	0.00346777
40%wt Ba0.6Sr0.4TiO3 - 60%wt MgO	ceramic	0.6	1360C	100k		8	-52				9.11179	0.00343467
40%wt Ba0.6Sr0.4TiO3 - 60%wt MgO	ceramic	0.6	1360C	100k		9	-52				10.8266	0.00337524
40%wt Ba0.6Sr0.4TiO3 - 60%wt MgO	ceramic	0.6	1360C	100k		10	-52				12.4727	0.00334866
40%wt Ba0.6Sr0.4TiO3 - 60%wt MgO	ceramic	0.6	1360C	100k		11	-52				14.1189	0.00331558
40%wt Ba0.6Sr0.4TiO3 - 60%wt MgO	ceramic	0.6	1360C	100k		12	-52				15.8334	0.00328248
40%wt Ba0.6Sr0.4TiO3 - 60%wt MgO	ceramic	0.6	1360C	100k		13	-52				17.3427	0.00322304
40%wt Ba0.6Sr0.4TiO3 - 60%wt MgO	ceramic	0.6	1360C	100k		14	-52				18.7155	0.00318992
40%wt Ba0.6Sr0.4TiO3 - 60%wt MgO	ceramic	0.6	1360C	100k		15	-52				20.1561	0.00313047
40%wt Ba0.6Sr0.4TiO3 - 60%wt MgO	ceramic	0.6	1360C	100k		16	-52				21.8706	0.00309079
40%wt Ba0.6Sr0.4TiO3 - 60%wt MgO	ceramic	0.6	1360C	100k		17	-52				23.1751	0.00303137
40%wt Ba0.6Sr0.4TiO3 - 60%wt MgO	ceramic	0.6	1360C	100k		18	-52				24.5476	0.00296536
40%wt Ba0.6Sr0.4TiO3 - 60%wt MgO	ceramic	0.6	1360C	100k		19	-52				26.1253	0.00291251
40%wt Ba0.6Sr0.4TiO3 - 60%wt MgO	ceramic	0.6	1360C	100k		20	-52				27.635	0.00285309
40%wt Ba0.6Sr0.4TiO3 - 60%wt MgO	ceramic	0.6	1360C	100k		21	-52				28.8707	0.00279365
40%wt Ba0.6Sr0.4TiO3 - 60%wt MgO	ceramic	0.6	1360C	100k		22	-52				29.9696	0.0027342
40%wt Ba0.6Sr0.4TiO3 - 60%wt MgO	ceramic	0.6	1360C	100k		23	-52				30.863	0.00268794
40%wt Ba0.6Sr0.4TiO3 - 60%wt MgO	ceramic	0.6	1360C	100k		24	-52				32.0987	0.00262193
40%wt Ba0.6Sr0.4TiO3 - 60%wt MgO	ceramic	0.6	1360C	100k		25	-52				32.7192	0.00256909
40%wt Ba0.6Sr0.4TiO3 - 60%wt MgO	ceramic	0.6	1360C	100k		26	-52				33.4758	0.00252282
40%wt Ba0.6Sr0.4TiO3 - 60%wt MgO	ceramic	0.6	1360C	100k		27	-52				33.9588	0.00246996
40%wt Ba0.6Sr0.4TiO3 - 60%wt MgO	ceramic	0.6	1360C	100k		28	-52				34.8532	0.00241711
40%wt Ba0.6Sr0.4TiO3 - 60%wt MgO	ceramic	0.6	1360C	100k		29	-52				35.5417	0.00236425
40%wt Ba0.6Sr0.4TiO3 - 60%wt MgO	ceramic	0.6	1360C	100k		30	-52				36.4352	0.00231797
Ba0.6Sr0.4TiO3 – 4%wt MgO	ceramic	0.6	1200C	100k		0	~ 17	~2500	~2500	Smaller grains closer to MgO inclusions (200nm - 1um) and larger grains in BST matrix (> few microns)	0.0704225	0.005	70
Ba0.6Sr0.4TiO3 – 4%wt MgO	ceramic	0.6	1200C	100k		4	~ 17	~2500	~2500	Smaller grains closer to MgO inclusions (200nm - 1um) and larger grains in BST matrix (> few microns)	6.74651	0.005	70
Ba0.6Sr0.4TiO3 – 4%wt MgO	ceramic	0.6	1200C	100k		6	~ 17	~2500	~2500	Smaller grains closer to MgO inclusions (200nm - 1um) and larger grains in BST matrix (> few microns)	13.852	0.005	70
Ba0.6Sr0.4TiO3 – 4%wt MgO	ceramic	0.6	1200C	100k		8	~ 17	~2500	~2500	Smaller grains closer to MgO inclusions (200nm - 1um) and larger grains in BST matrix (> few microns)	19.4786	0.005	70
Ba0.6Sr0.4TiO3 – 4%wt MgO	ceramic	0.6	1200C	100k		10	~ 17	~2500	~2500	Smaller grains closer to MgO inclusions (200nm - 1um) and larger grains in BST matrix (> few microns)	25.3872	0.005	70
Ba0.6Sr0.4TiO3 – 4%wt MgO	ceramic	0.6	1200C	100k		12	~ 17	~2500	~2500	Smaller grains closer to MgO inclusions (200nm - 1um) and larger grains in BST matrix (> few microns)	28.8308	0.005	70
Ba0.6Sr0.4TiO3 – 4%wt MgO	ceramic	0.6	1200C	100k		14	~ 17	~2500	~2500	Smaller grains closer to MgO inclusions (200nm - 1um) and larger grains in BST matrix (> few microns)	33.0491	0.005	70
Ba0.6Sr0.4TiO3 – 4%wt MgO	ceramic	0.6	1200C	100k		16	~ 17	~2500	~2500	Smaller grains closer to MgO inclusions (200nm - 1um) and larger grains in BST matrix (> few microns)	36.7042	0.005	70
Ba0.6Sr0.4TiO3 – 4%wt MgO	ceramic	0.6	1200C	100k		18	~ 17	~2500	~2500	Smaller grains closer to MgO inclusions (200nm - 1um) and larger grains in BST matrix (> few microns)	39.0211	0.005	70
Ba0.6Sr0.4TiO3 – 4%wt MgO	ceramic	0.6	1200C	100k		20	~ 17	~2500	~2500	Smaller grains closer to MgO inclusions (200nm - 1um) and larger grains in BST matrix (> few microns)	42.4648	0.005	70
45wt%Ba0.55Sr0.45TiO3 – 55wt%MgO (BaTiO3 +SrTiO3+basic magnesium carbonate)	ceramic	0.55	1450C/3h	microwave	RT	0			65.69	BST- 1.63um / MgO - 4.27um	0	0.0039	71
45wt%Ba0.55Sr0.45TiO3 – 55wt%MgO (BaTiO3 +SrTiO3+basic magnesium carbonate)	ceramic	0.55	1450C/3h	microwave	RT	5			65.69	BST- 1.63um / MgO - 4.27um	0.716846	0.0039	71
45wt%Ba0.55Sr0.45TiO3 – 55wt%MgO (BaTiO3 +SrTiO3+basic magnesium carbonate)	ceramic	0.55	1450C/3h	microwave	RT	10			65.69	BST- 1.63um / MgO - 4.27um	1.91159	0.0039	71
45wt%Ba0.55Sr0.45TiO3 – 55wt%MgO (BaTiO3 +SrTiO3+basic magnesium carbonate)	ceramic	0.55	1450C/3h	microwave	RT	15			65.69	BST- 1.63um / MgO - 4.27um	3.10633	0.0039	71
45wt%Ba0.55Sr0.45TiO3 – 55wt%MgO (BaTiO3 +SrTiO3+basic magnesium carbonate)	ceramic	0.55	1450C/3h	microwave	RT	20			65.69	BST- 1.63um / MgO - 4.27um	4.06213	0.0039	71
45wt%Ba0.55Sr0.45TiO3 – 55wt%MgO (BaTiO3 +SrTiO3+basic magnesium carbonate)	ceramic	0.55	1450C/3h	microwave	RT	25			65.69	BST- 1.63um / MgO - 4.27um	5.73477	0.0039	71
45wt%Ba0.55Sr0.45TiO3 – 55wt%MgO (BaTiO3 +SrTiO3+basic magnesium carbonate)	ceramic	0.55	1450C/3h	microwave	RT	30			65.69	BST- 1.63um / MgO - 4.27um	5.97372	0.0039	71
45wt%Ba0.55Sr0.45TiO3 – 55wt%MgO (BaTiO3 +SrTiO3+light magnesium oxide)	ceramic	0.55	1450C/3h	microwave	RT	0			73.76	BST - 1.21um / MgO - 4.29um	0	0.00373	71
45wt%Ba0.55Sr0.45TiO3 – 55wt%MgO (BaTiO3 +SrTiO3+light magnesium oxide)	ceramic	0.55	1450C/3h	microwave	RT	5			73.76	BST - 1.21um / MgO - 4.29um	0.219058	0.00373	71
45wt%Ba0.55Sr0.45TiO3 – 55wt%MgO (BaTiO3 +SrTiO3+light magnesium oxide)	ceramic	0.55	1450C/3h	microwave	RT	10			73.76	BST - 1.21um / MgO - 4.29um	1.31435	0.00373	71
45wt%Ba0.55Sr0.45TiO3 – 55wt%MgO (BaTiO3 +SrTiO3+light magnesium oxide)	ceramic	0.55	1450C/3h	microwave	RT	15			73.76	BST - 1.21um / MgO - 4.29um	2.40964	0.00373	71
45wt%Ba0.55Sr0.45TiO3 – 55wt%MgO (BaTiO3 +SrTiO3+light magnesium oxide)	ceramic	0.55	1450C/3h	microwave	RT	20			73.76	BST - 1.21um / MgO - 4.29um	3.28587	0.00373	71
45wt%Ba0.55Sr0.45TiO3 – 55wt%MgO (BaTiO3 +SrTiO3+light magnesium oxide)	ceramic	0.55	1450C/3h	microwave	RT	25			73.76	BST - 1.21um / MgO - 4.29um	3.72399	0.00373	71
45wt%Ba0.55Sr0.45TiO3 – 55wt%MgO (BaTiO3 +SrTiO3+light magnesium oxide)	ceramic	0.55	1450C/3h	microwave	RT	30			73.76	BST - 1.21um / MgO - 4.29um	4.60022	0.00373	71
45wt%Ba0.55Sr0.45TiO3 – 55wt%MgO (BaTiO3 +SrTiO3+heavy magnesium oxide)	ceramic	0.55	1450C/3h	microwave	RT	0			85.57	BST - 1.62um / MgO - 4.21um	0	0.004	71
45wt%Ba0.55Sr0.45TiO3 – 55wt%MgO (BaTiO3 +SrTiO3+heavy magnesium oxide)	ceramic	0.55	1450C/3h	microwave	RT	5			85.57	BST - 1.62um / MgO - 4.21um	0.890472	0.004	71
45wt%Ba0.55Sr0.45TiO3 – 55wt%MgO (BaTiO3 +SrTiO3+heavy magnesium oxide)	ceramic	0.55	1450C/3h	microwave	RT	10			85.57	BST - 1.62um / MgO - 4.21um	2.13713	0.004	71
45wt%Ba0.55Sr0.45TiO3 – 55wt%MgO (BaTiO3 +SrTiO3+heavy magnesium oxide)	ceramic	0.55	1450C/3h	microwave	RT	15			85.57	BST - 1.62um / MgO - 4.21um	3.56189	0.004	71
45wt%Ba0.55Sr0.45TiO3 – 55wt%MgO (BaTiO3 +SrTiO3+heavy magnesium oxide)	ceramic	0.55	1450C/3h	microwave	RT	20			85.57	BST - 1.62um / MgO - 4.21um	4.80855	0.004	71
45wt%Ba0.55Sr0.45TiO3 – 55wt%MgO (BaTiO3 +SrTiO3+heavy magnesium oxide)	ceramic	0.55	1450C/3h	microwave	RT	25			85.57	BST - 1.62um / MgO - 4.21um	5.87711	0.004	71
45wt%Ba0.55Sr0.45TiO3 – 55wt%MgO (BaTiO3 +SrTiO3+heavy magnesium oxide)	ceramic	0.55	1450C/3h	microwave	RT	30			85.57	BST - 1.62um / MgO - 4.21um	7.12378	0.004	71
45wt%Ba0.55Sr0.45TiO3 – 55wt%MgO (BaCO3 , SrCO3 , TiO2+basic magnesium carbonate)	ceramic	0.55	1450C/3h	microwave	RT	0			99.34	BST - 2.48um / MgO - 6.48um	0	0.00392	71
45wt%Ba0.55Sr0.45TiO3 – 55wt%MgO (BaCO3 , SrCO3 , TiO2+basic magnesium carbonate)	ceramic	0.55	1450C/3h	microwave	RT	5			99.34	BST - 2.48um / MgO - 6.48um	0.73692	0.00392	71
45wt%Ba0.55Sr0.45TiO3 – 55wt%MgO (BaCO3 , SrCO3 , TiO2+basic magnesium carbonate)	ceramic	0.55	1450C/3h	microwave	RT	10			99.34	BST - 2.48um / MgO - 6.48um	2.21076	0.00392	71
45wt%Ba0.55Sr0.45TiO3 – 55wt%MgO (BaCO3 , SrCO3 , TiO2+basic magnesium carbonate)	ceramic	0.55	1450C/3h	microwave	RT	15			99.34	BST - 2.48um / MgO - 6.48um	3.83198	0.00392	71
45wt%Ba0.55Sr0.45TiO3 – 55wt%MgO (BaCO3 , SrCO3 , TiO2+basic magnesium carbonate)	ceramic	0.55	1450C/3h	microwave	RT	20			99.34	BST - 2.48um / MgO - 6.48um	5.60059	0.00392	71
45wt%Ba0.55Sr0.45TiO3 – 55wt%MgO (BaCO3 , SrCO3 , TiO2+basic magnesium carbonate)	ceramic	0.55	1450C/3h	microwave	RT	25			99.34	BST - 2.48um / MgO - 6.48um	7.07443	0.00392	71
45wt%Ba0.55Sr0.45TiO3 – 55wt%MgO (BaCO3 , SrCO3 , TiO2+basic magnesium carbonate)	ceramic	0.55	1450C/3h	microwave	RT	30			99.34	BST - 2.48um / MgO - 6.48um	8.99042	0.00392	71
45wt%Ba0.55Sr0.45TiO3 – 55wt%MgO (BaCO3 , SrCO3 , TiO2+light magnesium oxide)	ceramic	0.55	1450C/3h	microwave	RT	0			104.29	BST - 3.82um / MgO - 5.75um	0	0.00408	71
45wt%Ba0.55Sr0.45TiO3 – 55wt%MgO (BaCO3 , SrCO3 , TiO2+light magnesium oxide)	ceramic	0.55	1450C/3h	microwave	RT	5			104.29	BST - 3.82um / MgO - 5.75um	0.411805	0.00408	71
45wt%Ba0.55Sr0.45TiO3 – 55wt%MgO (BaCO3 , SrCO3 , TiO2+light magnesium oxide)	ceramic	0.55	1450C/3h	microwave	RT	10			104.29	BST - 3.82um / MgO - 5.75um	1.37268	0.00408	71
45wt%Ba0.55Sr0.45TiO3 – 55wt%MgO (BaCO3 , SrCO3 , TiO2+light magnesium oxide)	ceramic	0.55	1450C/3h	microwave	RT	15			104.29	BST - 3.82um / MgO - 5.75um	2.6081	0.00408	71
45wt%Ba0.55Sr0.45TiO3 – 55wt%MgO (BaCO3 , SrCO3 , TiO2+light magnesium oxide)	ceramic	0.55	1450C/3h	microwave	RT	20			104.29	BST - 3.82um / MgO - 5.75um	3.70625	0.00408	71
45wt%Ba0.55Sr0.45TiO3 – 55wt%MgO (BaCO3 , SrCO3 , TiO2+light magnesium oxide)	ceramic	0.55	1450C/3h	microwave	RT	25			104.29	BST - 3.82um / MgO - 5.75um	4.94166	0.00408	71
45wt%Ba0.55Sr0.45TiO3 – 55wt%MgO (BaCO3 , SrCO3 , TiO2+light magnesium oxide)	ceramic	0.55	1450C/3h	microwave	RT	30			104.29	BST - 3.82um / MgO - 5.75um	6.17708	0.00408	71
45wt%Ba0.55Sr0.45TiO3 – 55wt%MgO (BaCO3 , SrCO3 , TiO2+heavy magnesium oxide)	ceramic	0.55	1450C/3h	microwave	RT	0			141.55	BST - 2.94um / MgO - 7.10um	0	0.00289	71
45wt%Ba0.55Sr0.45TiO3 – 55wt%MgO (BaCO3 , SrCO3 , TiO2+heavy magnesium oxide)	ceramic	0.55	1450C/3h	microwave	RT	5			141.55	BST - 2.94um / MgO - 7.10um	0.363416	0.00289	71
45wt%Ba0.55Sr0.45TiO3 – 55wt%MgO (BaCO3 , SrCO3 , TiO2+heavy magnesium oxide)	ceramic	0.55	1450C/3h	microwave	RT	10			141.55	BST - 2.94um / MgO - 7.10um	1.45366	0.00289	71
45wt%Ba0.55Sr0.45TiO3 – 55wt%MgO (BaCO3 , SrCO3 , TiO2+heavy magnesium oxide)	ceramic	0.55	1450C/3h	microwave	RT	15			141.55	BST - 2.94um / MgO - 7.10um	2.66505	0.00289	71
45wt%Ba0.55Sr0.45TiO3 – 55wt%MgO (BaCO3 , SrCO3 , TiO2+heavy magnesium oxide)	ceramic	0.55	1450C/3h	microwave	RT	20			141.55	BST - 2.94um / MgO - 7.10um	3.99758	0.00289	71
45wt%Ba0.55Sr0.45TiO3 – 55wt%MgO (BaCO3 , SrCO3 , TiO2+heavy magnesium oxide)	ceramic	0.55	1450C/3h	microwave	RT	25			141.55	BST - 2.94um / MgO - 7.10um	5.57238	0.00289	71
45wt%Ba0.55Sr0.45TiO3 – 55wt%MgO (BaCO3 , SrCO3 , TiO2+heavy magnesium oxide)	ceramic	0.55	1450C/3h	microwave	RT	30			141.55	BST - 2.94um / MgO - 7.10um	6.90491	0.00289	71
Ba0.6Sr0.4TiO3	ceramic	1		3.5G		1.563	5.8				0	0.022	55
Ba0.6Sr0.4TiO3	ceramic	1		3.5G		2.344	5.8				1.93	0.022	55
Ba0.6Sr0.4TiO3	ceramic	1		3.5G		3.125	5.8				2.87	0.022	55
Ba0.6Sr0.4TiO3	ceramic	1		3.5G		3.906	5.8				4.73	0.022	55
Ba0.6Sr0.4TiO3	ceramic	1		3.5G		4.688	5.8				7.43	0.022	55
Ba0.6Sr0.4TiO3	ceramic	1		3.5G		5.469	5.8				10.03	0.022	55
Ba0.6Sr0.4TiO3	ceramic	1		3.5G		6.25	5.8				12.54	0.022	55
Ba0.6Sr0.4TiO3	ceramic	1		3.5G		7.031	5.8				14.97	0.022	55
Ba0.6Sr0.4TiO3	ceramic	1		3.5G		7.813	5.8				16.54	0.022	55
Ba0.6Sr0.4TiO3	ceramic	1		3.5G		8.594	5.8				18.83	0.022	55
Ba0.6Sr0.4TiO3	ceramic	1		3.5G		9.375	5.8				21.04	0.022	55
Ba0.6Sr0.4TiO3	ceramic	1		3.5G		10.156	5.8				23.18	0.022	55
Ba0.6Sr0.4TiO3	ceramic	1		3.5G		10.938	5.8				25.92	0.022	55
Ba0.6Sr0.4TiO3	ceramic	1		3.5G		11.719	5.8				28.54	0.022	55
Ba0.6Sr0.4TiO3	ceramic	1		3.5G		12.5	5.8				29.81	0.022	55
Ba0.6Sr0.4TiO3	ceramic	1		3.5G		13.281	5.8				31.66	0.022	55

## Sheet: References
Reference No.	DOI	Citation
1	https://doi.org/10.1016/S0955-2219(03)00486-2	F. Zimmermann, W. Menesklou and E. Ivers-Tiffée, J. Eur. Ceram. Soc., 2004, 24, 1811–1814.
2	https://doi.org/10.1063/1.3000057	J. Zhang, J. Zhai, H. Jiang and X. Yao, J. Appl. Phys., 2008, 104.
3	https://doi.org/10.1016/j.jpcs.2010.07.024	Q. Xu, X.-F. Zhang, Y.-H. Huang, W. Chen, H.-X. Liu, M. Chen and B.-H. Kim, J. Phys. Chem. Solids, 2010, 71, 1550–1556.
4	http://dx.doi.org/10.1016/j.jallcom.2017.09.330	P. Z. Ge, X. G. Tang, Q. X. Liu, Y. P. Jiang, W. H. Li and B. Li, J. Alloys Compd., 2018, 731, 70–77.
5		C. M. and S. Y. and C. Y. and F. C. and G. W. and X. D. and X. Meng, Mater. Res. Express, 2017, 4, 16302.
6	https://doi.org/10.1016/j.ssc.2004.05.016	X. G. Tang, J. Wang, X. X. Wang and H. L. W. Chan, Solid State Commun., 2004, 131, 163–168.
7	https://doi.org/10.1063/1.1498496	Z. Yu, C. Ang, R. Guo and A. S. Bhalla, Appl. Phys. Lett., 2002, 81, 1285–1287.
8	https://doi.org/10.1023/B:JECR.0000026372.07871.a4	T. Wang, X. M. Chen and X. H. Zheng, J. Electroceramics, 2003, 11, 173–178.
9	https://doi.org/10.1038/s41598-017-07192-x	P. Ren, Z. Liu, Q. Wang, B. Peng, S. Ke, H. Fan and G. Zhao, Sci. Rep., 2017, 7, 1–9.
10	https://doi.org/10.1063/1.1721469	L. Davis and L. G. Rubin, J. Appl. Phys., 1953, 24, 1194–1197.
11	https://doi.org/10.1111/jace.15242	T. Teranishi, K. Osaki, H. Hayashi and A. Kishimoto, J. Am. Ceram. Soc., 2018, 101, 723–731.
12	https://doi.org/10.1016/j.ceramint.2018.01.258	P. Ren, J. He, X. Wang, Z. Wan, Z. Liu, Z. Duan, H. Fan and G. Zhao, Ceram. Int., 2018, 44, 8133–8137.
13	https://doi.org/10.1109/TUFFC.2013.2740	F. L. Martínez, J. Hinojosa, G. Doménech, F. J. Fernández-luque, J. Zapata, R. Ruiz and L. Pardo, IEEE Trans. Ultrason. Ferroelectr. Freq. Control, 2013, 60, 1595–1602.
14	https://doi.org/10.1016/j.ceramint.2017.06.060	X. Zhao, R. Liang, Z. Zhou and X. Dong, Ceram. Int., 2017, 43, 14473–14475.
15	https://doi.org/10.1016/j.jeurceramsoc.2016.12.016	P. Ren, Q. Wang, S. Li and G. Zhao, J. Eur. Ceram. Soc., 2017, 37, 1501–1507.
16	https://doi.org/10.1016/10.1063/1.4961424	L. Li, M. Spreitzer, D. Suvorov and X. M. Chen, J. Appl. Phys., 2016, 120, 074109.
17		X. X. Huang, T. F. Zhang, X. G. Tang, Y. P. Jiang, Q. X. Liu, Z. Y. Feng and Q. F. Zhou, Sci. Rep., 2016, 6, 1–11.
18	https://doi.org/10.1080/00150193.2017.1282761	E. A. Nenasheva, N. F. Kartenko, I. M. Gaidamaka, S. S. Redozubov, A. B. Kozyrev and A. D. Kanareykin, Ferroelectrics, 2017, 506, 174–183.
19	https://doi.org/10.1016/j.jeurceramsoc.2018.01.033	F. Marlec, C. Le Paven, F. Cheviré, L. Le Gendre, R. Benzerga, B. Guiffard, T. Dufay, F. Tessier, B. Messaid and A. Sharaiha, J. Eur. Ceram. Soc., 2018, 38, 2526–2533.
20	https://doi.org/10.1016/j.ceramint.2011.04.074	M. Zhang, J. Zhai and X. Yao, Ceram. Int., 2012, 38, S173–S176.
21	https://doi.org/10.1007/s10854-016-5068-2	S. Tio, J. Mater. Sci. Mater. Electron., 2016, 27, 9976–9980.
22	https://doi.org/10.1016/j.ceramint.2016.06.141	R. Laishram, K. C. Singh and C. Prakash, Ceram. Int., 2016, 42, 14970–14975.
23	https://doi.org/10.1063/1.3663566	W. Liao, R. Liang, G. Wang, F. Cao and X. Dong, Appl. Phys. Lett., 2011, 99, 1–4.
24	https://doi.org/10.1063/1.1388856	C. Ang, a. S. Bhalla, R. Guo and L. E. Cross, J. Appl. Phys., 2001, 90, 2465.
25	https://doi.org/10.1063/1.1781734	X. G. Tang, K. H. Chew, J. Wang and H. L. W. Chan, Appl. Phys. Lett., 2004, 85, 991–993.
26		B. Shen, J. Zhai and X. Yao, Appl. Phys. Lett., 2005, 86, 1–3.
27	https://doi.org/10.1007/s100190050098	L. C. Sengupta and S. Sengupta, Mater. Res. Innov., 1999, 2, 278–282.
28		B. S. Titanate, System, 1997, 99.
29		P. Taylor, S. Agrawal, R. Guo, D. Agrawal and A. S. Bhalla, 2010, 37–41.
30	https://doi.org/10.1038/nature12582	C. H. Lee, N. D. Orloff, T. Birol, Y. Zhu, V. Goian, E. Rocas, R. Haislmaier, E. Vlahos, J. A. Mundy, L. F. Kourkoutis, Y. Nie, M. D. Biegalski, J. Zhang, M. Bernhagen, N. A. Benedek, Y. Kim, J. D. Brock, R. Uecker, X. X. Xi, V. Gopalan, D. Nuzhnyy, S. Kamba, D. A. Muller, I. Takeuchi, J. C. Booth, C. J. Fennie and D. G. Schlom, Nature, 2013, 502, 532–536.
31	https://doi.org/10.1016/j.jallcom.2017.09.330	P. Z. Ge, X. G. Tang, Q. X. Liu, Y. P. Jiang, W. H. Li and B. Li, J. Alloys Compd., 2018, 731, 70–77.
32	https://doi.org/10.1063/1.2081131	S. W. Liu, J. Weaver, Z. Yuan, W. Donner, C. L. Chen, J. C. Jiang, E. I. Meletis, W. Chang, S. W. Kirchoefer, J. Horwitz and A. Bhalla, Appl. Phys. Lett., 2005, 87, 1–3.
33	https://doi.org/10.1063/1.1378811	S. B. Majumder, M. Jain, A. Martinez, R. S. Katiyar, F. W. Van Keuls and F. A. Miranda, J. Appl. Phys., 2001, 90, 896–903.
34	https://doi.org/10.1063/1.1818724	N. K. Pervez, P. J. Hansen and R. A. York, Appl. Phys. Lett., 2004, 85, 4451–4453.
35	https://doi.org/10.1063/1.366062	C. Basceri, S. K. Streiffer, A. I. Kingon and R. Waser, J. Appl. Phys., 1997, 82, 2497–2504.
36		P. Du, X. Li, Y. Liu, G. Han and W. Weng, J. Eur. Ceram. Soc., 2006, 26, 2147–2150.
37	https://doi.org/10.1063/1.126536	J. Hao, W. Si, X. X. Xi, R. Guo, A. S. Bhalla and L. E. Cross, Appl. Phys. Lett., 2000, 76, 3100–3102.
38	https://doi.org/10.1063/1.1771459	M. Jain, N. K. Karan, R. S. Katiyar, A. S. Bhalla, F. A. Miranda and F. W. Van Keuls, Appl. Phys. Lett., 2004, 85, 275–277.
39		J. Zhai, X. Yao, Z. Xu and H. Chen, J. Appl. Phys., 2006, 100.
40		M. H. Wu and J. M. Wu, Appl. Phys. Lett., 2005, 86, 23–26.
41		L.-J. Wu, J.-M. Wu, H.-E. Huang and H.-Y. Bor, Appl. Phys. Lett., 2007, 90, 072901.
42		J. Zhai, X. Yao, L. Zhang, B. Shen and C. Haydn, Ferroelectrics, 2005, 329, 23–27.
43	https://doi.org/10.1063/1.2721968	Z. Ying, P. Yun, X. Y. Zhou, Z. T. Song, S. L. Feng, Y. Wang, D. Y. Wang and H. L. W. Chan, J. Appl. Phys., 2007, 101, 2005–2008.
44	https://doi.org/10.1063/1.2720303	X. H. Zhu, J. Li and D. N. Zheng, Appl. Phys. Lett., 2007, 90, 1–4.
45	https://doi.org/10.1063/1.2201632	Y. Xia, C. Cai, X. Zhi, B. Pan, D. Wu, X. Meng and Z. Liu, Appl. Phys. Lett., 2006, 88, 5–8.
46		Q. Y. Shao, A. D. Li, Y. D. Xia, D. Wu, Z. G. Liu and N. Ben Ming, J. Appl. Phys., 2006, 100, 1–4.
47	https://doi.org/10.1063/1.2770962	M. Jain, N. K. Karan, J. Yoon, H. Wang, I. Usov, R. S. Katiyar, A. S. Bhalla and Q. X. Jia, Appl. Phys. Lett., 2007, 91, 1–4.
48		S. E. Moon, M. H. Kwak, Y. T. Kim, H. C. Ryu, S. J. Lee and K. Y. Kang, Integr. Ferroelectr., 2006, 77, 37–44.
49	https://doi.org/10.1063/1.1353838	S. Abadei, S. Gevorgian, C. R. Cho, A. Grishin, J. Andreasson and T. Lindbäck, Appl. Phys. Lett., 2001, 78, 1900–1902.
50	https://doi.org/10.1063/1.1613036	J. Lu and S. Stemmer, Appl. Phys. Lett., 2003, 83, 2411–2413.
51	https://doi.org/10.1063/1.3126442	S. W. Jiang, Y. R. Li, R. G. Li, N. D. Xiong, L. F. Tan, X. Z. Liu and B. W. Tao, Appl. Phys. Lett., 2009, 94, 2007–2010.
52	https://doi.org/10.1063/1.1505669	W. Chang and L. Sengupta, 2003, 3941, 3–9.
53	https://doi.org/10.1109/TUFFC.2010.1581	Yanyan He, Yebin Xu, Ting Liu, Chunlian Zeng, and Wanping Chen, IEEE Transactions on Ultrasonics, Ferroelectrics, and Frequency Control, vol. 57, no. 7, July 2010
54	https://doi.org/10.1088/2053-1591/aa523a	Chaoliang Mao et al 2017 Mater. Res. Express 4 016302
55	QMUL Samples - Paper under review	Hangfeng Zhang, Henry Giddens et al...
56	https://doi.org/10.1016/j.jallcom.2011.12.105	Guoxin Hu et.al Journal of Alloys and Compounds, Volume 518, 2012, Pages 44-50
57	https://doi.org/10.1016/j.matchemphys.2008.10.008	P. Liu, J.L. Ma, L. Meng, et al., Mater. Chem. Phys. 114 (2009) 624–628.
58	https://doi.org/10.1016/j.ceramint.2012.11.089	Microwave dielectric properties and low sintering temperature of Ba0.5Sr0.5TiO3–Mg2TiO4 composites synthesized in situ by the hydrothermal method, Ceramics International, Volume 39, Issue 5, 2013
59	https://doi.org/10.1063/1.2784202	Xiujian Chou, Jiwei Zhai, and Xi Yao, Appl. Phys. Lett. 91, 122908 (2007)
60	https://doi.org/10.1111/jace.15242	Teranishi T, Osaki K, Hayashi H, Kishimoto A, J Am Ceram Soc. 2018;101:723–731
61	https://doi.org/10.1016/j.jallcom.2017.12.279	Xiaomeng M. , Sanshan Li , Yanyan He, Ting Liu , Yebin Xu, Journal of Alloys and Compounds, Vol 739, March 2018, Pages 755-763
62	https://doi.org/10.1080/00150190490460803	Agrawal S, Guo R, Agrawal D, et al. Tunable BST: MgO Dielectric Composite by Microwave Sintering. Ferroelectrics, 2004, 306(1): 155-163.
63	https://doi.org/10.1016/j.actamat.2009.06.011	Zhang J , Zhai J , Chou X , et al. Microwave and infrared dielectric response of tunable Ba1−xSrxTiO3 ceramics. Acta Materialia, 2009, 57(15):4491-4499.
64	https://doi.org/10.1063/1.3563576	S. K. SahooD. Misra, M. Sahoo, C. A. MacDonald, H. Bakhru, D. C. Agrawal, Y. N. Mohapatra, S. B. Majumder, and R. S. Katiyar; Journal of Applied Physics 109, 064108 (2011)
65	https://doi.org/10.1080/10584580108011962	Michael Voigts , Wolfgang Menesklou & Ellen Ivers-Tiffee (2001) Dielectric properties and tunability of BST and BZT thick films for microwave applications, Integrated Ferroelectrics, 39:1-4, 383-392
66	https://doi.org/10.1111/j.1551-2916.2011.04577.x	Mingwei Zhang, Jiwei Zhai, Bo Shen, Xi Yao, MgO Doping Effects on Dielectric Properties of Ba0.55Sr0.45TiO3 Ceramics , Journal of the American Ceramic Society, May 2011
67	https://doi.org/10.1080/00150190490460803	S. Agarwal, R. Guo, D. Agarwal, Tunable BST:MgO Dielectric Composite by Microwave Sintering, Ferroelectrics, Volume 306, 2004 - Issue 1
68	https://doi.org/10.1088/1674-1056/24/12/127704	Du Hong-Lei(杜洪磊) a) , Xue Qian(薛 倩) a) , Gao Xiao-Yang(高小洋) a) , Yao Feng-Rui, Ultrahigh frequency tunability of aperture-coupled microstrip antenna via electric-field tunable BST, Chinese Physics, Vol. 24, No. 12 (2015) 127704
69	https://patents.google.com/patent/US5635434A/en	sengupta et al. CERAMC FERROELECTRIC COMPOSITE MATERAL-BSTO-MAGNESUM BASED COMPOUND
70	https://doi.org/10.1063/1.2837621	Chung, U-Chan & Elissalde, Catherine & Maglione, Mario & Estournès, Claude & Pate, Muhammad & Ganne, Jean-Pierre. (2008). Low-losses, highly tunable Ba0.6Sr0.4TiO3/MgO composite. Applied Physics Letters. 92. 042902 - 042902. 10.1063/1.2837621.
71	https://doi.org/10.1080/10584587.2016.1252661	Hai Jiang, Xiao-Hong Wang, Hua-Bo Wang, Jing Tao & Wen-Zhong Lu (2016) Effect of raw material on properties of Ba 0.55 Sr 0.45 TiO 3 /MgO composites, Integrated Ferroelectrics, 176:1, 275-282
